# Supplementary material for: (o-CF3PhO)3P as a simple coupling reagent for direct amidation via activation of amines
Source: Royal Society of Chemistry journal article supplement (doi:10.1039/d3qo01705b), 2024-01-01
Supplement: d3qo01705b1.pdf [file d3qo01705b1.pdf]

*Supporting Information*

## **(*o*-CF<sub>3</sub>PhO)<sub>3</sub>P as a simple coupling reagent for direct amidation *via* activation of amines**

*Lin Zhang,\*<sup>†</sup> Nana Ma,<sup>†</sup> Mei Wang, Wenchang Gou, Jie Tian, Qian Xu, Chong Zhao, and Chun Li\**

State Key Laboratory of Functions and Applications of Medicinal Plants & School of Pharmaceutical Sciences, Guizhou Medical University, Guiyang 550004, People's Republic of China

\*Corresponding information: E-mail: [scuchunli@163.com](mailto:scuchunli@163.com); [gmulinzhang@163.com](mailto:gmulinzhang@163.com)

### **Table of Contents**

|                                                                                                 |      |
|-------------------------------------------------------------------------------------------------|------|
| <b>1. General information</b> .....                                                             | S2   |
| <b>2. Experimental Section</b> .....                                                            | S2   |
| 2.1 Synthesis of ( <i>o</i> -CF <sub>3</sub> PhO) <sub>3</sub> P.....                           | S2   |
| 2.2 General Procedure for Synthesis of amides ( <b>P1-P54</b> ) .....                           | S2   |
| 2.3 General Procedure for Synthesis of lactams ( <b>P55-P57</b> ) .....                         | S14  |
| 2.4 General Procedure for Synthesis of amides containing chiral center ( <b>P58-P62</b> ) ..... | S15  |
| 2.5 General Procedure for Synthesis of dipeptides ( <b>P63-P67</b> ) .....                      | S16  |
| <b>3. PMI calculations</b> .....                                                                | S18  |
| <b>4. Mechanistic studies</b> .....                                                             | S19  |
| 4.1 Control Experiments.....                                                                    | S19  |
| 4.2 DFT Calculation.....                                                                        | S20  |
| <b>5. Copies of NMR Spectra</b> .....                                                           | S31  |
| <b>6. Chiral HPLC analysis</b> .....                                                            | S102 |

## 1. General information

Unless otherwise noted, reagents were obtained from commercial sources and used without further purification. All work-up and purification procedures were carried out with reagent-grade solvents in air.  $^1\text{H}$ ,  $^{13}\text{C}$  NMR,  $^{31}\text{P}$  NMR and  $^{19}\text{F}$  NMR spectra were recorded with Bruker AV-600 or AV-400 spectrometers in  $\text{DMSO-}d_6$  or  $\text{CDCl}_3$  with tetramethylsilane (TMS) as an internal reference. Abbreviations are as follows: s (singlet), d (doublet), m (multiplet). HRMS was performed on a Waters Xevo G2-S Qtof instrument using electrospray ionization (ESI) techniques. Melting points of products in solid states were taken on a Yice wx-4 melting point apparatus without calibration.

## 2. Experimental Section

### 2.1 Synthesis of (*o*- $\text{CF}_3\text{PhO}$ ) $_3\text{P}$

To a solution of 2-(trifluoromethyl)phenol (10 g, 61.7 mmol, 3.3 equiv.) and triethylamine (10.4 mL, 74.8 mmol, 4.0 equiv.) in dry THF (120 mL) in two necked round bottomed flask, was slowly added a solution of  $\text{PCl}_3$  (1.6 mL, 18.7 mmol, 1.0 equiv.) in dry THF (20 mL) at 0 °C. Then, the mixture was warmed to room temperature and stirred for 24 h. The solvent was concentrated under reduced pressure and the crude product was further purified by column chromatography on silica gel (Petroleum ether / EtOAc = 200/1) to give the pure (*o*- $\text{CF}_3\text{PhO}$ ) $_3\text{P}$  as colorless oil (7.7 g, 80% yield).  $^1\text{H}$  NMR (600 MHz,  $\text{DMSO-}d_6$ ):  $\delta$  7.79 (d,  $J$  = 6.0 Hz, 3H), 7.71-7.74 (m, 3H), 7.50 (d,  $J$  = 6.0 Hz, 3H), 7.39-7.42 (m, 3H).  $^{13}\text{C}$  NMR (150 MHz,  $\text{DMSO-}d_6$ ):  $\delta$  148.9, 134.9 128.0 (d,  $J_{\text{C-F}}$  = 4.5 Hz), 125.3, 123.4 (dd,  $J_{\text{C-F}}$  = 541.5 Hz,  $J_{\text{C-F}}$  = 270.0 Hz), 121.1 (d,  $J_{\text{C-F}}$  = 12 Hz), 120.8 (d,  $J_{\text{C-F}}$  = 30 Hz).  $^{19}\text{F}$  NMR (564 MHz,  $\text{DMSO-}d_6$ ):  $\delta$  -60.46.  $^{31}\text{P}$  NMR (243 MHz,  $\text{DMSO-}d_6$ ):  $\delta$  127.47. HRMS:  $[\text{M}+\text{Na}]^+$  calcd for  $\text{C}_{21}\text{H}_{21}\text{O}_3\text{F}_9\text{PNa}$  537.0273, found 537.0276.

### 2.2 General Procedure for Synthesis of amides (**P1-P54**)

To a 10 mL tube were added amine (0.5 mmol, 1.0 equiv.), carboxylic acid (0.5 mmol, 1.0 equiv.), (*o*- $\text{CF}_3\text{PhO}$ ) $_3\text{P}$  (257 mg, 0.5 mmol, 1.0 equiv.) and  $\text{CH}_3\text{CN}$  (0.5 mL). The mixture was warmed to 80 °C in an oil bath and stirred for the indicated reaction time using magnetic stirring. Then, the solvent was concentrated under reduced pressure and the crude product was further purified by column chromatography on silica gel to give the pure product (**P1-P54**).

#### **N-*p*-Tolyl-benzamide (P1)**

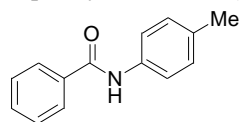

Known compound,<sup>[1]</sup> white solid, mp: 170-172 °C, purified by silica gel chromatography (petroleum ether/ethyl acetate = 5:1), 96% yield, 102 mg.  $^1\text{H}$  NMR (600 MHz,  $\text{DMSO-}d_6$ ):  $\delta$  10.18 (s, 1H), 7.95 (d,  $J$  = 6.0 Hz, 2H), 7.67 (d,  $J$  = 3.0 Hz, 2H), 7.57-7.60 (m, 1H), 7.51-7.54 (m, 2H), 7.16 (d,  $J$  = 3.0 Hz, 2H), 2.28 (s, 3H).  $^{13}\text{C}$  NMR (150 MHz,  $\text{DMSO-}d_6$ ):  $\delta$  165.8, 137.1, 135.5, 133.1, 131.9, 129.5, 128.8, 128.1, 120.8, 21.0.

#### **N-(4-Fluoro-phenyl)-benzamide (P2)**

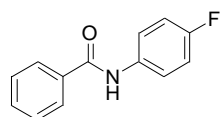

Known compound,<sup>[1]</sup> white solid, mp: 197-198 °C, purified by silica gel

chromatography (petroleum ether/ethyl acetate = 3:1), 99% yield, 107 mg.  $^1\text{H}$  NMR (600 MHz, DMSO- $d_6$ ):  $\delta$  10.33 (s, 1H), 7.96 (d,  $J$  = 3.0 Hz, 2H), 7.80-7.82 (m, 2H), 7.59-7.61 (m, 1H), 7.53-7.55 (m, 2H), 7.19-7.22 (m, 2H).  $^{13}\text{C}$  NMR (150 MHz, DMSO- $d_6$ ):  $\delta$  165.9, 158.7 (d,  $J_{\text{C-F}}$  = 238.5 Hz), 136.0 (d,  $J_{\text{C-F}}$  = 1.5 Hz), 135.3, 132.08, 128.9, 128.1, 122.6 (d,  $J_{\text{C-F}}$  = 7.5 Hz), 115.7 (d,  $J_{\text{C-F}}$  = 22.5 Hz).

#### ***N*-(4-Methoxy-phenyl)-benzamide (P3)**

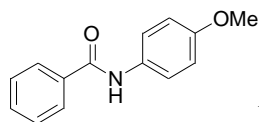

Known compound,<sup>[1]</sup> light purple solid, mp: 173-175 °C, purified by silica gel chromatography (petroleum ether/ethyl acetate = 8:1), 93% yield, 106 mg.  $^1\text{H}$  NMR (600 MHz, DMSO- $d_6$ ):  $\delta$  10.14 (s, 1H), 7.95 (d,  $J$  = 3.0 Hz, 2H), 7.67 (d,  $J$  = 6.0 Hz, 2H), 7.57-7.59 (m, 1H), 7.51-7.54 (m, 1H), 6.94 (d,  $J$  = 3.0 Hz, 2H), 3.75 (s, 3H).  $^{13}\text{C}$  NMR (150 MHz, DMSO- $d_6$ ):  $\delta$  165.6, 156.0, 135.5, 132.69, 131.9, 128.8, 128.0, 122.4, 114.2, 55.6.

#### **4-Nitro-*N*-(*p*-tolyl)benzamide (P4)**

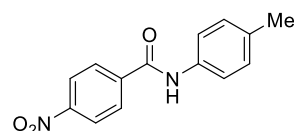

Known compound,<sup>[2]</sup> light yellow solid, mp: 199-201 °C, purified by silica gel chromatography (petroleum ether / ethyl acetate = 8:1). 91% yield, 117 mg.  $^1\text{H}$  NMR (400 MHz, DMSO- $d_6$ ):  $\delta$  10.49 (s, 1H), 8.37 (d,  $J$  = 6.0 Hz, 2H), 8.18 (d,  $J$  = 4.0 Hz, 2H), 7.67 (d,  $J$  = 6.0 Hz, 2H), 7.18 (d,  $J$  = 4.0 Hz, 2H), 2.29 (s, 3H).  $^{13}\text{C}$  NMR (100 MHz, DMSO- $d_6$ ):  $\delta$  164.1, 149.6, 141.2, 136.7, 133.7, 129.6, 129.5, 124.0, 121.0, 21.0.

#### **4-Cyano-*N*-(*p*-tolyl)benzamide(P5)**

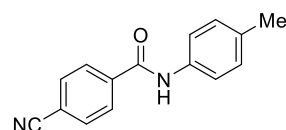

White solid, mp: 179-181 °C, purified by silica gel chromatography (petroleum ether / ethyl acetate = 5:1). 93% yield, 110 mg.  $^1\text{H}$  NMR (400 MHz, DMSO- $d_6$ ):  $\delta$  10.40 (s, 1H), 8.10 (d,  $J$  = 4.0 Hz, 2H), 8.02 (d,  $J$  = 4.0 Hz, 2H), 7.65 (d,  $J$  = 4.0 Hz, 2H), 7.18 (d,  $J$  = 6.0 Hz, 2H), 2.29 (s, 3H).  $^{13}\text{C}$  NMR (100 MHz, DMSO- $d_6$ ):  $\delta$  164.4, 139.5, 136.7, 133.6, 132.9, 129.6, 129.0, 120.9, 118.8, 114.2, 21.0. HRMS:  $[\text{M}+\text{H}]^+$  calcd for  $\text{C}_{15}\text{H}_{13}\text{N}_2\text{O}$  237.1022, found 237.1016.

#### **3-Chloro-4-methyl-*N*-(3-trifluoromethyl-phenyl)-benzamide (P6)**

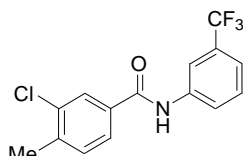

White solid, mp: 164-166 °C, purified by silica gel chromatography (petroleum ether/ethyl acetate = 5:1), 99% yield, 156 mg.  $^1\text{H}$  NMR (600 MHz, DMSO- $d_6$ ):  $\delta$  10.55 (s, 1H), 8.23 (s, 1H), 8.06 (d,  $J$  = 3.0 Hz, 2H), 7.88 (d,  $J$  = 3.0 Hz, 1H), 7.59-7.62 (m, 1H), 7.54 (d,  $J$  = 6.0 Hz, 1H), 7.47 (d,  $J$  = 3.0 Hz, 1H), 2.42 (s, 3H).  $^{13}\text{C}$  NMR (150 MHz, DMSO- $d_6$ ):  $\delta$  164.8, 140.2 (d,  $J_{\text{C-F}}$  = 10.5 Hz), 134.2, 133.9, 131.8, 130.4, 129.9 (q,  $J_{\text{C-F}}$  = 63 Hz), 128.4, 127.0, 125.5, 124.3, 123.7, 120.6 (d,  $J_{\text{C-F}}$  = 3.0 Hz), 116.9 (d,  $J_{\text{C-F}}$  = 4.5 Hz), 20.1. HRMS:  $[\text{M}-\text{H}]^-$  calcd for  $\text{C}_{15}\text{H}_{10}\text{ClF}_3\text{NO}$  312.0409, found 312.0409.

### N-Cyclohexyl-benzamide (P7)

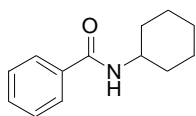

Known compound,<sup>[1]</sup> white solid, mp: 154-156 °C, purified by silica gel chromatography (petroleum ether/ethyl acetate = 5:1), 90% yield, 92 mg. <sup>1</sup>H NMR (600 MHz, DMSO-*d*<sub>6</sub>): δ 8.21 (d, *J* = 3.0 Hz, 1H), 7.84 (d, *J* = 3.0 Hz, 2H), 7.49-7.52 (m, 1H), 7.43-7.45 (m, 2H), 3.75-3.76 (m, 1H), 1.73-1.82 (m, 4H), 1.61 (d, *J* = 6.0 Hz, 1H), 1.26-1.34 (m, 4H), 1.11-1.17 (m, 1H). <sup>13</sup>C NMR (150 MHz, DMSO-*d*<sub>6</sub>): δ 165.8, 135.3, 131.4, 128.6, 127.7, 48.8, 32.9, 25.7, 25.4.

### N-Phenethyl-benzamide (P8)

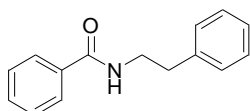

Known compound,<sup>[1]</sup> white solid, mp: 123-125 °C, purified by silica gel chromatography (petroleum ether/ethyl acetate = 8:1), 82% yield, 92 mg. <sup>1</sup>H NMR (600 MHz, DMSO-*d*<sub>6</sub>): δ 8.57-8.59 (m, 1H), 7.83 (d, *J* = 3.0 Hz, 2H), 7.50-7.53 (m, 1H), 7.44-7.47 (m, 2H), 7.29-7.31 (m, 2H), 7.25 (d, *J* = 3.0 Hz, 2H), 7.19-7.22 (m, 1H), 3.47-3.50 (m, 2H), 2.84-2.86 (m, 2H). <sup>13</sup>C NMR (150 MHz, DMSO-*d*<sub>6</sub>): δ 166.6, 140.0, 135.1, 131.5, 129.1, 128.8, 128.7, 127.6, 126.6, 41.4, 35.6.

### 4-Chloro-N-(2-morpholin-4-yl-ethyl)-benzamide (P9)

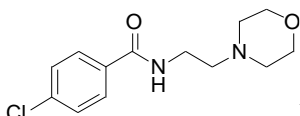

Known compound,<sup>[1]</sup> white solid, mp: 146-148 °C, purified by silica gel chromatography (dichloromethane/methanol = 20:1), 95% yield, 127 mg. <sup>1</sup>H NMR (600 MHz, DMSO-*d*<sub>6</sub>): δ 8.51 (s, 1H), 7.85 (d, *J* = 6.0 Hz, 2H), 7.54 (d, *J* = 6.0 Hz, 2H), 3.56 (s, 4H), 3.36-3.39 (m, 4H), 2.44-2.46 (m, 2H), 2.40 (s, 2H). <sup>13</sup>C NMR (150 MHz, DMSO-*d*<sub>6</sub>): δ 165.5, 136.4, 133.7, 129.5, 128.8, 66.7, 57.8, 53.8, 37.1.

### N-(2,6-Dimethyl-phenyl)-benzamide (P10)

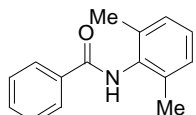

Known compound,<sup>[3]</sup> white solid, mp: 162-163 °C, purified by silica gel chromatography (petroleum ether/ethyl acetate = 5:1), 84% yield, 95 mg. <sup>1</sup>H NMR (600 MHz, DMSO-*d*<sub>6</sub>): δ 9.78 (s, 1H), 8.01 (d, *J* = 3.0 Hz, 2H), 7.58-7.61 (m, 1H), 7.52-7.54 (m, 2H), 7.13 (s, 3H), 2.18 (s, 6H). <sup>13</sup>C NMR (150 MHz, DMSO-*d*<sub>6</sub>): δ 165.4, 136.1, 135.8, 134.8, 132.0, 128.9, 128.2, 128.0, 127.2, 18.5.

### N-(2,6-Dimethyl-phenyl)-2,6-dimethyl-benzamide (P11)

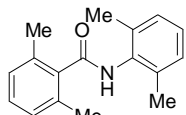

White solid, mp: 263-265 °C, purified by silica gel chromatography (petroleum ether/ethyl acetate = 5:1), 83% yield, 105 mg. <sup>1</sup>H NMR (600 MHz, DMSO-*d*<sub>6</sub>): δ 9.78 (s, 1H), 7.21-7.23 (m, 1H), 7.12 (d, *J* = 3.0 Hz, 5H), 2.41 (s, 6H), 2.31 (s, 6H). <sup>13</sup>C NMR (150 MHz, DMSO-*d*<sub>6</sub>): δ 167.9, 139.1, 135.7, 135.3, 134.3, 128.7, 128.5, 127.9, 127.0, 20.2, 19.7. HRMS: [M+H]<sup>+</sup> calcd for C<sub>17</sub>H<sub>20</sub>NO 254.1539, found 254.1549.



### Biphenyl-2-carboxylic acid *o*-tolylamide (P12)

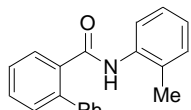

Known compound,<sup>[4]</sup> white solid, mp: 135-137 °C, purified by silica gel chromatography (petroleum ether/ethyl acetate = 10:1), 80% yield, 115 mg. <sup>1</sup>H NMR (600 MHz, DMSO-*d*<sub>6</sub>): δ 9.57 (s, 1H), 7.62 (d, *J* = 3.0 Hz, 1H), 7.55-7.58 (m, 1H), 7.46-7.51 (m, 4H), 7.41-7.44 (m, 2H), 7.35-7.37 (m, 1H), 7.29 (d, *J* = 6.0 Hz, 1H), 7.12-7.15 (m, 2H), 7.05-7.07 (m, 1H), 1.94 (m, 3H). <sup>13</sup>C NMR (150 MHz, DMSO-*d*<sub>6</sub>): δ 168.4, 140.7, 139.6, 137.8, 136.5, 132.8, 130.7, 130.4, 130.0, 129.0, 128.8, 128.4, 127.9, 127.7, 126.3, 125.9, 125.8, 17.8.

### 2-Amino-N-(2-morpholin-4-yl-ethyl)-benzamide (P13)

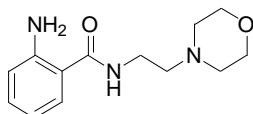

Known compound,<sup>[5]</sup> light yellow solid, mp: 122-124 °C, purified by silica gel chromatography (dichloromethane/methanol = 40:1), 81% yield, 101 mg. <sup>1</sup>H NMR (600 MHz, DMSO-*d*<sub>6</sub>): δ 8.11-8.12 (m, 1H), 7.43 (d, *J* = 3.0 Hz, 1H), 7.11-7.13 (m, 1H), 7.68 (d, *J* = 3.0 Hz, 1H), 6.49-6.52 (m, 1H), 6.35 (s, 2H), 3.57-3.58 (m, 4H), 3.32-3.35 (m, 2H), 2.43-2.47 (m, 6H). <sup>13</sup>C NMR (150 MHz, DMSO-*d*<sub>6</sub>): δ 169.2, 149.9, 132.0, 128.4, 116.7, 115.6, 115.0, 66.6, 57.8, 53.7, 36.4.

### 3-Amino-4-fluoro-N-(4-trifluoromethoxy-phenyl)-benzamide (P14)

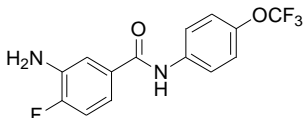

White solid, mp: 150-152 °C, purified by silica gel chromatography (petroleum ether/ethyl acetate = 5:1), 84% yield, 132 mg. <sup>1</sup>H NMR (600 MHz, DMSO-*d*<sub>6</sub>): δ 10.30 (s, 1H), 7.86-7.88 (m, 2H), 7.36 (d, *J* = 3.0 Hz, 3H), 7.14 (d, *J* = 3.0 Hz, 2H), 5.43 (s, 2H). <sup>13</sup>C NMR (150 MHz, DMSO-*d*<sub>6</sub>): δ 166.0, 153.7, 152.1, 144.2, 139.0, 137.0 (d, *J*<sub>C-F</sub> = 13.5 Hz), 131.8, 122.0 (d, *J*<sub>C-F</sub> = 15 Hz), 120.6 (d, *J*<sub>C-F</sub> = 238.5 Hz), 116.4 (d, *J*<sub>C-F</sub> = 6.0 Hz), 115.9 (d, *J*<sub>C-F</sub> = 7.5 Hz), 115.1 (d, *J*<sub>C-F</sub> = 19.5 Hz). HRMS: [M+H]<sup>+</sup> calcd for C<sub>14</sub>H<sub>11</sub>N<sub>2</sub>O<sub>2</sub>F<sub>4</sub> 315.0751, found 315.0754.

### N-(4-Nitro-phenyl)-benzamide (P15)

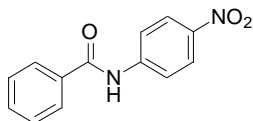

Known compound,<sup>[6]</sup> yellow solid, mp: 194-196 °C, purified by silica gel chromatography (petroleum ether/ethyl acetate = 8:1), 58% yield, 71 mg. <sup>1</sup>H NMR (600 MHz, DMSO-*d*<sub>6</sub>): δ 10.82 (s, 1H), 8.27 (d, *J* = 6.0 Hz, 2H), 8.07 (d, *J* = 6.0 Hz, 2H), 7.99 (d, *J* = 3.0 Hz, 2H), 7.63-7.65 (m, 1H), 7.55-7.58 (m, 2H). <sup>13</sup>C NMR (150 MHz, DMSO-*d*<sub>6</sub>): δ 166.8, 146.0, 142.9, 134.7, 132.7, 129.0, 128.4, 125.27, 120.3.

### N-(4-cyanophenyl)benzamide (P16)

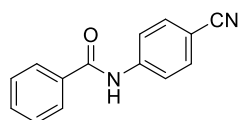

Known compound,<sup>[7]</sup> white solid, mp: 168-170 °C, purified by silica gel chromatography (petroleum ether / ethyl acetate = 5:1). 80% yield, 90 mg. <sup>1</sup>H NMR (400 MHz, DMSO-*d*<sub>6</sub>): δ 10.65 (s, 1H), 8.00 (d, *J* = 6.0 Hz, 2H), 7.97 (d, *J* = 4.0 Hz, 2H), 7.81 (d, *J* = 4.0 Hz,

2H), 7.62-7.65 (m, 1H), 7.54-7.58 (m, 2H). <sup>13</sup>C NMR (100 MHz, DMSO-*d*<sub>6</sub>): δ 166.6, 143.9, 134.8, 133.6, 132.5, 128.9, 128.3, 120.6, 119.5, 105.8.

#### N-(2-Chloro-4-trifluoromethoxy-phenyl)-4-hydroxy-3-methoxy-benzamide (P17)

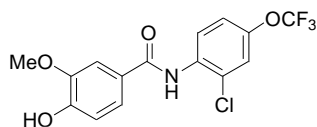

White solid, mp: 149-150 °C, purified by silica gel chromatography (petroleum ether/ethyl acetate = 10:1), 71% yield, 128 mg. <sup>1</sup>H NMR (400 MHz, DMSO-*d*<sub>6</sub>): δ 9.92 (s, 1H), 9.80 (s, 1H), 7.71 (d, *J* = 2.0 Hz, 2H), 7.56 (s, 1H), 7.52 (d, *J* = 4.0 Hz, 1H), 7.44 (d, *J* = 4.0 Hz, 1H), 6.89 (d, *J* = 4.0 Hz, 1H), 3.85 (s, 3H). <sup>13</sup>C NMR (100 MHz, DMSO-*d*<sub>6</sub>): δ 165.5, 150.8, 147.8, 146.1, 135.5, 130.8, 129.9, 124.8, 123.0, 121.7, 120.8, 115.4, 112.2, 56.2. HRMS: [M+Na]<sup>+</sup> calcd for C<sub>15</sub>H<sub>11</sub>NO<sub>4</sub>F<sub>3</sub>ClNa 384.0221, found 384.0224.

#### N-(4-Fluoro-3-methyl-phenyl)-3-sulfamoyl-benzamide (P18)

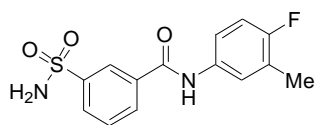

White solid, mp: 191-193 °C, purified by silica gel chromatography (dichloromethane/methanol = 15:1), 99% yield, 154 mg. <sup>1</sup>H NMR (600 MHz, DMSO-*d*<sub>6</sub>): δ 10.49 (s, 1H), 8.38 (s, 1H), 8.17 (d, *J* = 3.0 Hz, 1H), 8.03 (d, *J* = 3.0 Hz, 1H), 7.73-7.76 (m, 1H), 7.69 (d, *J* = 3.0 Hz, 1H), 7.60 (s, 1H), 7.51 (s, 2H), 7.13-7.16 (m, 1H), 2.25 (s, 3H). <sup>13</sup>C NMR (150 MHz, DMSO-*d*<sub>6</sub>): δ 164.7, 158.4, 156.8, 145.0, 136.0, 135.3 (d, *J*<sub>C-F</sub> = 3.0 Hz), 130.4 (d, *J*<sub>C-F</sub> = 210.0 Hz), 128.9, 125.5, 124.6 (d, *J*<sub>C-F</sub> = 18.0 Hz), 124.1 (d, *J*<sub>C-F</sub> = 4.5 Hz), 120.3 (d, *J*<sub>C-F</sub> = 7.5 Hz), 115.4 (d, *J*<sub>C-F</sub> = 24.0 Hz), 14.8 (d, *J*<sub>C-F</sub> = 3.0 Hz). HRMS: [M+Na]<sup>+</sup> calcd for C<sub>14</sub>H<sub>13</sub>FN<sub>2</sub>O<sub>3</sub>SNa 331.0523, found 331.0522.

#### N,N-Diethyl-nicotinamide (P19)

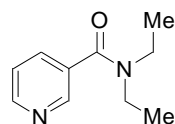

Known compound,<sup>[8]</sup> light yellow oil, purified by silica gel chromatography (dichloromethane/methanol = 40:1), 65% yield, 59 mg. <sup>1</sup>H NMR (600 MHz, DMSO-*d*<sub>6</sub>): δ 8.64 (d, *J* = 3.0 Hz, 1H), 8.57 (s, 1H), 7.80 (d, *J* = 3.0 Hz, 1H), 7.46-7.48 (m, 1H), 3.46 (d, *J* = 3.0 Hz, 2H), 3.19 (d, *J* = 3.0 Hz, 2H), 1.16 (s, 3H), 1.06 (s, 3H). <sup>13</sup>C NMR (150 MHz, DMSO-*d*<sub>6</sub>): δ 168.1, 150.48, 147.2, 134.4, 133.5, 124.0, 43.4, 39.3, 14.5, 13.3.

#### Pyridine-2-carboxylic acid (pyridin-2-ylmethyl)-amide (P20)

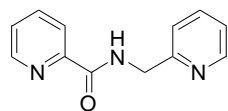

Known compound,<sup>[9]</sup> light yellow oil, purified by silica gel chromatography (dichloromethane/methanol = 40:1), 61% yield, 65 mg. <sup>1</sup>H NMR (400 MHz, DMSO-*d*<sub>6</sub>): δ 9.39-9.41 (m, 1H), 8.70 (d, *J* = 2.0 Hz, 1H), 8.54 (d, *J* = 2.0 Hz, 1H), 8.08 (d, *J* = 4.0 Hz, 1H), 8.00-8.05 (m, 1H), 7.74-7.78 (m, 1H), 7.62-7.66 (m, 1H), 7.33 (d, *J* = 4.0 Hz, 1H), 7.26-7.29 (m, 1H), 4.64 (d, *J* = 2.0 Hz, 2H). <sup>13</sup>C NMR (100 MHz, DMSO-*d*<sub>6</sub>): δ 164.5, 158.4, 150.2, 149.3, 149.0, 138.3, 137.20, 127.1, 122.6, 122.4, 121.45, 44.6.

### 5-Bromo-6-chloro-N-[4-(chloro-difluoro-methoxy)-phenyl]-nicotinamide (P21)

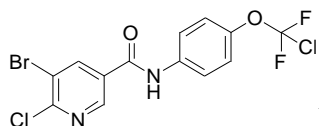

White solid, mp: 185-187 °C, purified by silica gel chromatography (petroleum ether/ethyl acetate = 5:1), 75% yield, 155 mg. <sup>1</sup>H NMR (600 MHz, DMSO-*d*<sub>6</sub>): δ 10.68 (s, 1H), 8.93 (s, 1H), 8.73 (s, 1H), 7.87 (d, *J* = 6.0 Hz, 2H), 7.39 (d, *J* = 6.0 Hz, 2H). <sup>13</sup>C NMR (150 MHz, DMSO-*d*<sub>6</sub>): δ 162.3, 152.4, 148.3, 145.9, 142.2, 138.2, 131.4, 125.4 (t, *J*<sub>C-F</sub> = 285 Hz), 122.4, 122.2, 119.7. HRMS: [M-H]<sup>-</sup> calcd for C<sub>13</sub>H<sub>6</sub>N<sub>2</sub>O<sub>2</sub>F<sub>2</sub>Cl<sub>2</sub>Br 408.8963, found 408.8959.

### N-(4-Fluoro-phenyl)-2-methyl-nicotinamide (P22)

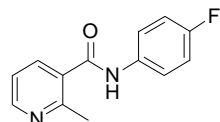

White solid, mp: 162-164 °C, purified by silica gel chromatography (dichloromethane/methanol = 10:1), 92% yield, 107 mg. <sup>1</sup>H NMR (600 MHz, DMSO-*d*<sub>6</sub>): δ 10.52 (s, 1H), 8.57 (d, *J* = 6.0 Hz, 1H), 7.88 (d, *J* = 3.0 Hz, 1H), 7.75-7.77 (m, 2H), 7.34-7.37 (m, 1H), 7.19-7.22 (m, 2H), 2.57 (s, 3H). <sup>13</sup>C NMR (150 MHz, DMSO-*d*<sub>6</sub>): δ 166.97, 158.82 (d, *J*<sub>C-F</sub> = 238.5), 155.5, 150.3, 135.9 (d, *J*<sub>C-F</sub> = 3.0 Hz), 135.6, 132.6, 123.0 (d, *J*<sub>C-F</sub> = 7.5 Hz), 121.4, 115.8 (d, *J*<sub>C-F</sub> = 22.5 Hz), 23.0. HRMS: [M+H]<sup>+</sup> calcd for C<sub>13</sub>H<sub>12</sub>FN<sub>2</sub>O 231.0928, found 231.0930.

### 2-Hydroxy-quinoline-4-carboxylic acid (2-diethylamino-ethyl)-amide (P23)

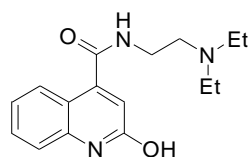

White solid, mp: 270-272 °C, precipitated by ethyl acetate, 99% yield, 143 mg. <sup>1</sup>H NMR (600 MHz, DMSO-*d*<sub>6</sub>): δ 11.94 (s, 1H), 8.64-8.65 (m, 1H), 7.79 (d, *J* = 3.0 Hz, 1H), 7.52-7.54 (m, 1H), 7.35 (d, *J* = 3.0 Hz, 1H), 7.17-7.20 (m, 1H), 6.47 (s, 1H), 3.34-3.36 (m, 4H), 2.53-2.58 (m, 4H), 0.97-0.99 (m, 6H). <sup>13</sup>C NMR (150 MHz, DMSO-*d*<sub>6</sub>): δ 166.1, 161.8, 147.1, 139.7, 131.2, 126.6, 122.4, 119.9, 116.7, 116.1, 51.9, 47.0, 37.7, 12.4. HRMS: [M+H]<sup>+</sup> calcd for C<sub>16</sub>H<sub>22</sub>N<sub>3</sub>O<sub>2</sub> 288.1707, found 288.1703.

### (2-Chloro-pyrimidin-5-yl)-pyrrolidin-1-yl-methanone (P24)

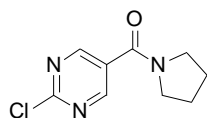

White solid, mp: 113-115 °C, purified by silica gel chromatography (dichloromethane/methanol = 50:1), 73% yield, 77 mg. <sup>1</sup>H NMR (600 MHz, DMSO-*d*<sub>6</sub>): δ 8.96 (s, 2H), 3.47-3.50 (m, 4H), 1.83-1.89 (m, 4H). <sup>13</sup>C NMR (150 MHz, DMSO-*d*<sub>6</sub>): δ = 163.1, 160.9, 159.3, 130.3, 48.9, 46.7, 26.4, 24.4. HRMS: [M+H]<sup>+</sup> calcd for C<sub>9</sub>H<sub>11</sub>ClN<sub>3</sub>O 212.0585, found 212.0584.

### Benzofuran-2-carboxylic acid (2-morpholin-4-yl-ethyl)-amide (P25)

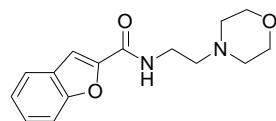

Known compound,<sup>[10]</sup> white solid, mp: 82-84 °C, purified by silica gel chromatography (dichloromethane/methanol = 40:1), 98% yield, 135 mg. <sup>1</sup>H NMR (600 MHz, DMSO-*d*<sub>6</sub>): δ 8.63-8.65 (m, 1H), 7.78 (d, *J* = 3.0 Hz, 1H), 7.67 (d, *J* = 3.0 Hz, 1H), 7.53 (s, 1H), 7.46-7.48 (m, 1H), 7.33-7.35 (m, 1H), 3.57-3.58 (m, 4H), 3.40-3.43 (m, 2H), 2.48-2.49 (m, 2H),

2.42 (s, 4H). <sup>13</sup>C NMR (150 MHz, DMSO-*d*<sub>6</sub>): δ 158.5, 154.6, 149.7, 127.7, 127.2, 124.2, 123.2, 112.2, 109.8, 66.7, 57.7, 53.7, 36.4.

### 2-Methyl-furan-3-carboxylic acid phenylamide (P26)

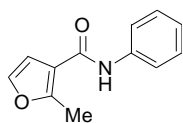

Known compound,<sup>[1]</sup> white solid, mp: 108-110 °C, purified by silica gel chromatography (petroleum ether/ethyl acetate = 15:1), 91% yield, 96 mg. <sup>1</sup>H NMR (400 MHz, DMSO-*d*<sub>6</sub>): δ 9.70 (s, 1H), 7.72 (d, *J* = 2.0 Hz, 2H), 7.60 (s, 1H), 7.32-7.34 (m, 2H), 7.09 (d, *J* = 2.0 Hz, 2H), 2.56 (s, 3H). <sup>13</sup>C NMR (100 MHz, DMSO-*d*<sub>6</sub>): δ 162.2, 157.3, 141.2, 139.4, 129.0, 124.0, 120.9, 116.5, 109.9, 13.8.

### Benzo[b]thiophen-2-yl-(2,6-dimethyl-morpholin-4-yl)-methanone (P27)

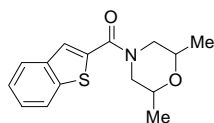

White solid, mp: 128-130 °C, purified by silica gel chromatography (petroleum ether/ethyl acetate = 10:1), 91% yield, 125 mg. <sup>1</sup>H NMR (600 MHz, CDCl<sub>3</sub>): δ 7.84-7.87 (m, 1H), 7.81-7.83 (m, 1H), 7.47 (s, 1H), 7.39-7.43 (m, 2H), 3.99-4.65 (m, 2H), 3.64 (s, 2H), 2.53-3.01 (m, 2H), 1.21 (s, 6H). <sup>13</sup>C NMR (150 MHz, CDCl<sub>3</sub>): δ 163.7, 140.2, 138.6, 136.4, 125.9, 125.4, 124.9, 124.6, 122.4, 72.0, 18.7. HRMS: [M+Na]<sup>+</sup> calcd for C<sub>15</sub>H<sub>17</sub>NO<sub>2</sub>SNa 298.0872, found 298.0874.

### 1H-Indole-2-carboxylic acid phenethyl-amide (P28)

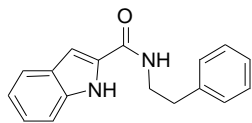

Light yellow solid, mp: 218-220 °C, purified by silica gel chromatography (dichloromethane/methanol = 20:1), 80% yield, 106 mg. <sup>1</sup>H NMR (600 MHz, DMSO-*d*<sub>6</sub>): δ 11.57 (s, 1H), 8.58-8.60 (m, 1H), 7.61 (d, *J* = 3.0 Hz, 1H), 7.43 (d, *J* = 3.0 Hz, 1H), 7.29-7.31 (m, 2H), 7.27 (d, *J* = 3.0 Hz, 2H), 7.16-7.21 (m, 2H), 7.10 (s, 1H), 7.02-7.04 (m, 1H), 3.51-3.54 (m, 2H), 2.86-2.89 (m, 2H). <sup>13</sup>C NMR (150 MHz, DMSO-*d*<sub>6</sub>): δ 161.5, 140.0, 136.8, 132.3, 129.2, 128.8, 127.6, 126.6, 123.7, 121.9, 120.1, 112.8, 102.7, 40.9, 35.7. HRMS: [M-H]<sup>-</sup> calcd for C<sub>17</sub>H<sub>15</sub>N<sub>2</sub>O 263.1190, found 263.1191.

### N-methoxy-N-methylbenzamide (P29)

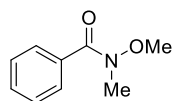

Known compound, <sup>[1]</sup> colorless oil, purified by silica gel chromatography (petroleum ether / ethyl acetate = 15:1). 91% yield, 75 mg. <sup>1</sup>H NMR (400 MHz, DMSO-*d*<sub>6</sub>): δ 7.56-7.59 (m, 2H), 7.42-7.52 (m, 3H), 3.54 (s, 3H), 3.25 (s, 3H). <sup>13</sup>C NMR (100 MHz, DMSO-*d*<sub>6</sub>): δ 169.6, 134.9, 130.8, 128.5, 128.0, 61.1, 33.7.

### 2,N-Di-p-tolyl-acetamide (P30)

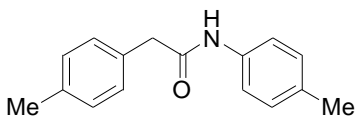

Known compound,<sup>[12]</sup> white solid, mp: 184-186 °C, purified by silica gel chromatography (petroleum ether/ethyl acetate = 5:1), 99% yield, 119 mg. <sup>1</sup>H NMR (400 MHz, DMSO-*d*<sub>6</sub>): δ 10.03 (s, 1H), 7.47 (d, *J* = 4.0 Hz, 2H), 7.21 (d, *J* = 2.0 Hz, 2H), 7.12 (d, *J* = 4.0 Hz, 2H), 7.09 (d, *J* = 2.0 Hz, 2H), 3.55 (s, 2H), 2.27 (s, 3H), 2.23 (s, 3H). <sup>13</sup>C NMR (100 MHz,

DMSO-*d*<sub>6</sub>):  $\delta$  169.5, 137.2, 136.0, 133.5, 132.5, 129.5, 129.4, 129.3, 119.6, 43.4, 21.1, 20.9.

#### N-(4-Fluoro-phenyl)-2-p-tolyl-acetamide (P31)

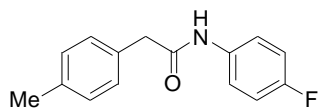

White solid, mp: 155-157 °C, purified by silica gel chromatography (petroleum ether/ethyl acetate = 3:1), 99% yield, 121 mg. <sup>1</sup>H NMR (400 MHz, DMSO-*d*<sub>6</sub>):  $\delta$  10.19 (s, 1H), 7.60-7.62 (m, 2H), 7.22 (d, *J* = 2.0 Hz, 2H), 7.12-7.15 (m, 4H), 3.57 (s, 2H), 2.27 (s, 3H). <sup>13</sup>C NMR (100 MHz, DMSO-*d*<sub>6</sub>):  $\delta$  169.6, 158.4 (d, *J*<sub>C-F</sub> = 238.0 Hz), 136.1 (d, *J*<sub>C-F</sub> = 2.0 Hz), 136.0, 133.3, 129.4 (d, *J*<sub>C-F</sub> = 7.0 Hz), 121.3 (d, *J*<sub>C-F</sub> = 8 Hz), 115.8, 115.6, 43.3, 21.1. HRMS: [M+Na]<sup>+</sup> calcd for C<sub>15</sub>H<sub>14</sub>FNONa 266.0952, found 266.0949.

#### N-(4-Methoxy-phenyl)-2-p-tolyl-acetamide (P32)

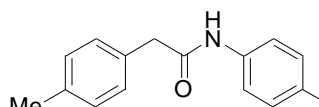

Light purple solid, mp: 171-173 °C, purified by silica gel chromatography (petroleum ether/ethyl acetate = 8:1), 99% yield, 127 mg. <sup>1</sup>H NMR (400 MHz, DMSO-*d*<sub>6</sub>):  $\delta$  9.89 (s, 1H), 7.49 (d, *J* = 4.0 Hz, 2H), 7.21 (d, *J* = 2.0 Hz, 2H), 7.12 (d, *J* = 4.0 Hz, 2H), 6.86 (d, *J* = 4.0 Hz, 2H), 3.70 (s, 3H), 3.54 (s, 2H), 2.27 (s, 3H). <sup>13</sup>C NMR (100 MHz, DMSO-*d*<sub>6</sub>):  $\delta$  169.2, 155.6, 135.9, 133.5, 132.9, 129.4, 129.3, 121.1, 114.3, 55.6, 43.3, 21.1. HRMS: [M-H]<sup>-</sup> calcd for C<sub>16</sub>H<sub>16</sub>NO<sub>2</sub> 254.1187, found 254.1184.

#### N-(3,5-Dimethyl-phenyl)-2-(4-hydroxy-phenyl)-acetamide (P33)

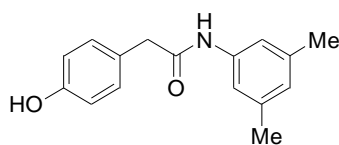

White solid, mp: 189-191 °C, purified by silica gel chromatography (dichloromethane/methanol = 50:1), 83% yield, 106 mg. <sup>1</sup>H NMR (400 MHz, DMSO-*d*<sub>6</sub>):  $\delta$  9.89 (s, 1H), 9.25 (s, 1H), 7.21 (s, 2H), 7.11 (d, *J* = 4.0 Hz, 2H), 6.67-6.71 (m, 3H), 3.46 (s, 2H), 2.21 (s, 6H). <sup>13</sup>C NMR (100 MHz, DMSO-*d*<sub>6</sub>):  $\delta$  170.0, 156.5, 139.6, 138.1, 130.4, 126.7, 125.1, 117.3, 115.5, 43.1, 21.5. HRMS: [M-H]<sup>-</sup> calcd for C<sub>16</sub>H<sub>16</sub>NO<sub>2</sub> 254.1187, found 254.1185.

#### N-methyl-N-phenyl-2-(p-tolyl)acetamide (P34)

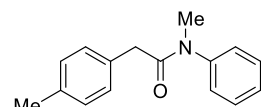

Light yellow oil, purified by silica gel chromatography (petroleum ether/ethyl acetate = 8:1), 90% yield, 108 mg. <sup>1</sup>H NMR (600 MHz, DMSO-*d*<sub>6</sub>):  $\delta$  7.35 (d, *J* = 6.0 Hz, 2H), 7.38 (s, 1H), 7.04 (d, *J* = 3.0 Hz, 2H), 6.90 (s, 2H), 3.34 (s, 3H), 3.17 (s, 2H), 2.25 (s, 3H). <sup>13</sup>C NMR (151 MHz, DMSO):  $\delta$  170.3, 144.4, 135.7, 133.2, 130.1, 129.4, 129.1, 128.0, 117.4, 40.5, 37.5, 21.1. HRMS: [M+H]<sup>+</sup> calcd for C<sub>16</sub>H<sub>18</sub>NO 240.1383, found 240.1373.

#### 1-(Indolin-1-yl)-2-(p-tolyl)ethan-1-one (P35)

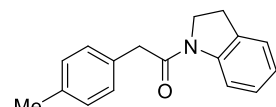

White solid, mp: 115-117 °C, purified by silica gel chromatography (petroleum ether/ethyl acetate = 8:1), 93% yield, 117 mg. <sup>1</sup>H NMR (600 MHz, DMSO-*d*<sub>6</sub>):  $\delta$  8.06 (d, *J* = 3.0 Hz, 1H), 7.22 (d, *J* = 3.0 Hz, 1H), 7.17 (d, *J* = 3.0 Hz, 2H), 7.13 (d, *J* = 6.0 Hz, 3H), 6.97-

6.99 (m, 1H), 4.11-4.14 (m, 2H), 3.78 (s, 2H), 3.11-3.14 (m, 2H), 2.28 (s, 3H).  $^{13}\text{C}$  NMR (150 MHz, DMSO- $d_6$ ):  $\delta$  169.7, 143.5, 136.0, 132.5, 132.2, 129.8, 129.3, 127.4, 125.3, 123.7, 116.4, 48.1, 42.3, 27.9, 21.1. HRMS:  $[\text{M}+\text{Na}]^+$   $\text{C}_{17}\text{H}_{17}\text{NONa}$  calcd for 274.1202, found 274.1200.

### 2-(4-chlorophenyl)-N-(thiazol-2-yl)acetamide (P36)

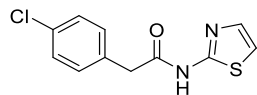

White solid, mp: 189-191 °C, purified by silica gel chromatography (petroleum ether/ethyl acetate = 2:1), 51% yield, 65 mg.  $^1\text{H}$  NMR (600 MHz, DMSO- $d_6$ ):  $\delta$  12.39 (s, 1H), 7.48 (d,  $J$  = 1.5 Hz, 1H), 7.40 (d,  $J$  = 6.0 Hz, 2H), 7.36 (d,  $J$  = 3.0 Hz, 2H), 7.22 (d,  $J$  = 3.0 Hz, 1H), 3.78 (s, 2H).  $^{13}\text{C}$  NMR (150 MHz, DMSO- $d_6$ ):  $\delta$  169.3, 158.4, 138.1, 134.4, 132.0, 131.6, 128.8, 114.0, 41.3. HRMS:  $[\text{M}+\text{Na}]^+$  calcd for  $\text{C}_{11}\text{H}_9\text{ClN}_2\text{OSNa}$  275.0016, found 275.0015.

### N-(2,6-Dimethyl-phenyl)-2-p-tolyl-acetamide (P37)

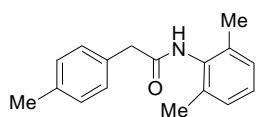

White solid, mp: 184-186 °C, purified by silica gel chromatography (petroleum ether/ethyl acetate = 5:1), 61% yield, 78 mg.  $^1\text{H}$  NMR (400 MHz, DMSO- $d_6$ ):  $\delta$  9.41 (s, 1H), 7.26 (d,  $J$  = 2.0 Hz, 2H), 7.14 (d,  $J$  = 4.0 Hz, 2H), 7.03-7.05 (m, 3H), 3.58 (s, 2H), 2.28 (s, 3H), 2.07 (s, 6H).  $^{13}\text{C}$  NMR (100 MHz, DMSO- $d_6$ ):  $\delta$  169.3, 135.9, 135.6, 135.6, 133.8, 129.4, 129.3, 128.1, 126.8, 42.6, 21.1, 18.5. HRMS:  $[\text{M}-\text{H}]^-$  calcd for  $\text{C}_{17}\text{H}_{18}\text{NO}$  252.1394, found 252.1394.

### N-(1-Naphthalen-1-yl-ethyl)-2-phenyl-isobutyramide (P38)

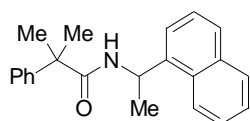

White solid, mp: 108-110 °C, purified by silica gel chromatography (petroleum ether/ethyl acetate = 3:1), 96% yield, 152 mg.  $^1\text{H}$  NMR (600 MHz, DMSO- $d_6$ ):  $\delta$  8.09 (d,  $J$  = 3.0 Hz, 1H), 7.91 (d,  $J$  = 6.0 Hz, 1H), 7.83 (d,  $J$  = 6.0 Hz, 1H), 7.79 (d,  $J$  = 3.0 Hz, 1H), 7.50-7.56 (m, 2H), 7.38-7.41 (m, 1H), 7.35 (d,  $J$  = 3.0 Hz, 1H), 7.26-7.29 (m, 4H), 7.18-7.21 (m, 1H), 5.72-5.77 (m, 1H), 1.49 (s, 3H), 1.44 (d,  $J$  = 6.0 Hz, 6H).  $^{13}\text{C}$  NMR (150 MHz, DMSO- $d_6$ ):  $\delta$  175.1, 146.7, 140.8, 133.7, 130.9, 129.0, 128.5, 127.6, 126.6, 126.5, 126.3, 126.0, 125.7, 123.7, 122.9, 46.5, 44.82, 27.6, 27.1, 21.5. HRMS:  $[\text{M}+\text{Na}]^+$  calcd for  $\text{C}_{22}\text{H}_{23}\text{NONa}$  340.1672, found 340.1671.

### 2-Phenyl-N-pyridin-3-yl-propionamide (P39)

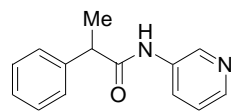

White solid, mp: 100-102 °C, purified by silica gel chromatography (petroleum ether/ethyl acetate = 1:1), 48% yield, 54 mg.  $^1\text{H}$  NMR (400 MHz, DMSO- $d_6$ ):  $\delta$  10.30 (s, 1H), 8.75 (d,  $J$  = 2.0 Hz, 1H), 8.25 (d,  $J$  = 2.0 Hz, 1H), 8.05 (d,  $J$  = 2.0 Hz, 1H), 7.40 (d,  $J$  = 2.0 Hz, 2H), 7.31-7.35 (m, 3H), 7.24-7.26 (m, 1H), 3.84-3.88 (m, 1H), 1.44 (d,  $J$  = 2.0 Hz, 3H).  $^{13}\text{C}$  NMR (100 MHz, DMSO- $d_6$ ):  $\delta$  173.2, 144.6, 142.0, 141.2, 136.3, 128.9, 127.7, 127.3, 126.5, 124.1, 46.4, 19.1. HRMS:  $[\text{M}-\text{H}]^-$  calcd for  $\text{C}_{14}\text{H}_{13}\text{N}_2\text{O}$  225.1033, found 225.1032.

### N-[2-(1H-Indol-3-yl)-ethyl]-2-(4-isobutyl-phenyl)-propionamide (P40)

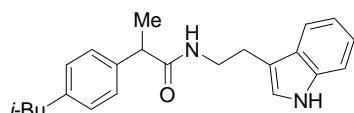

Light brown solid, mp: 99-101 °C, purified by silica gel

chromatography (petroleum ether/ethyl acetate = 10:1), 80% yield, 140 mg.  $^1\text{H}$  NMR (400 MHz, DMSO- $d_6$ ):  $\delta$  10.78 (s, 1H), 8.01-8.04 (m, 1H), 7.50 (d,  $J = 4.0$  Hz, 1H), 7.32 (d,  $J = 4.0$  Hz, 1H), 7.21 (d,  $J = 4.0$  Hz, 2H), 7.04-7.08 (m, 4H), 6.94-6.97 (m, 1H), 3.51-3.57 (m, 1H), 3.29-3.32 (m, 2H), 2.76-2.79 (m, 2H), 2.40 (d,  $J = 4.0$  Hz, 2H), 1.77-1.84 (m, 1H), 1.31 (d,  $J = 2.0$  Hz, 3H), 0.85 (d,  $J = 4.0$  Hz, 6H).  $^{13}\text{C}$  NMR (100 MHz, DMSO- $d_6$ ):  $\delta$  173.7, 140.1, 139.6, 136.7, 129.2, 127.7, 127.4, 123.1, 121.3, 118.7, 118.6, 112.2, 111.8, 45.2, 44.7, 30.1, 25.6, 22.7, 19.1. HRMS:  $[\text{M}+\text{Na}]^+$  calcd for  $\text{C}_{23}\text{H}_{28}\text{N}_2\text{ONa}$  371.2094, found 371.2094.

#### 4,4-Difluoro-cyclohexanecarboxylic acid p-tolylamide (P41)

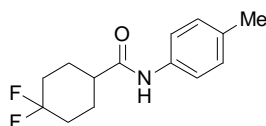

White solid, mp: 164-166 °C, purified by silica gel chromatography

(petroleum ether/ethyl acetate = 5:1), 99% yield, 126 mg.  $^1\text{H}$  NMR (400 MHz, DMSO- $d_6$ ):  $\delta$  9.85 (s, 1H), 7.48 (d,  $J = 2.0$  Hz, 2H), 7.09 (d,  $J = 2.0$  Hz, 2H), 2.43-2.47 (m, 1H), 2.24 (s, 3H), 2.07-2.12 (m, 3H), 1.81-1.90 (m, 4H), 1.67-1.71 (m, 2H).  $^{13}\text{C}$  NMR (100 MHz, DMSO- $d_6$ ):  $\delta$  173.0 (d,  $J_{\text{C-F}} = 2.0$  Hz), 137.2, 132.4, 129.5, 124.1 (dd,  $J_{\text{C-F}} = 238.0, 240.0$  Hz), 119.6, 42.4, 33.0, 32.7 (dd,  $J_{\text{C-F}} = 23.0, 25.0$  Hz), 26.1 (d,  $J_{\text{C-F}} = 9.0$  Hz), 20.9. HRMS:  $[\text{M}+\text{Na}]^+$  calcd for  $\text{C}_{14}\text{H}_{17}\text{F}_2\text{NONa}$  276.1170, found 276.1175.

#### 4,4-Difluoro-cyclohexanecarboxylic acid (1-phenyl-ethyl)-amide (P42)

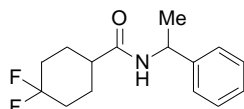

White solid, mp: 137-139 °C, purified by silica gel chromatography

(petroleum ether/ethyl acetate = 3:1), 78% yield, 105 mg.  $^1\text{H}$  NMR (600 MHz, DMSO- $d_6$ ):  $\delta$  8.30 (d,  $J = 6.0$  Hz, 1H), 7.28-7.31 (m, 4H), 7.20-7.22 (m, 1H), 4.87-4.92 (m, 1H), 2.30-2.34 (m, 1H), 2.02-2.06 (m, 2H), 1.76-1.81 (m, 4H), 1.54-1.63 (m, 2H), 1.33 (d,  $J = 3.0$  Hz, 3H).  $^{13}\text{C}$  NMR (150 MHz, DMSO- $d_6$ ):  $\delta$  173.3, 145.4, 128.7, 127.0, 126.3, 124.2 (t,  $J_{\text{C-F}} = 159.0$  Hz), 48.0, 41.4, 32.8 (t,  $J_{\text{C-F}} = 24$  Hz), 32.7 (t,  $J_{\text{C-F}} = 22.5$  Hz), 26.0 (dd,  $J_{\text{C-F}} = 9.0$  Hz, 34.5 Hz), 23.0. HRMS:  $[\text{M}-\text{H}]^-$   $\text{C}_{15}\text{H}_{18}\text{F}_2\text{NO}$  266.1362, found 266.1363.

#### 2-(1H-Indol-3-yl)-N-p-tolyl-acetamide (P43)

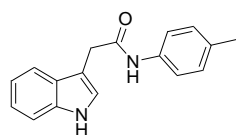

Known compound,<sup>[13]</sup> yellow solid, mp: 193-195 °C, purified by silica gel

chromatography (petroleum ether/ethyl acetate = 5:1), 97% yield, 131 mg.  $^1\text{H}$  NMR (400 MHz, DMSO- $d_6$ ):  $\delta$  10.91 (s, 1H), 10.00 (s, 1H), 7.61 (d,  $J = 2.0$  Hz, 1H), 7.49 (d,  $J = 2.0$  Hz, 2H), 7.35 (d,  $J = 4.0$  Hz, 1H), 7.25 (s, 1H), 7.06-7.09 (m, 3H), 6.97-6.99 (m, 3H), 3.70 (s, 2H), 2.23 (s, 3H).  $^{13}\text{C}$  NMR (100 MHz, DMSO):  $\delta$  169.9, 137.4, 136.6, 132.4, 129.5, 127.7, 124.3, 121.4, 119.6, 119.2, 118.8, 111.8, 109.12, 34.2, 20.9.

#### 2-(1H-Indol-3-yl)-N-phenethyl-acetamide (P44)

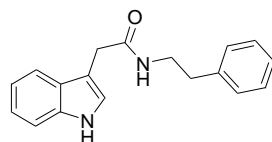

Light yellow oil, purified by silica gel chromatography

(dichloromethane/methanol = 100:1), 96% yield, 134 mg.  $^1\text{H}$  NMR (600 MHz,  $\text{DMSO-}d_6$ ):  $\delta$  10.86 (s, 1H), 7.90 (d,  $J = 3.0$  Hz, 1H), 7.51 (d,  $J = 3.0$  Hz, 1H), 7.34 (d,  $J = 6.0$  Hz, 1H), 7.23-7.26 (m, 2H), 7.17-7.19 (m, 1H), 7.14 (d,  $J = 6.0$  Hz, 3H), 7.05-7.08 (m, 1H), 6.95-6.98 (m, 1H), 3.48 (s, 2H), 3.25-3.29 (m, 2H), 2.67-2.70 (m, 2H).  $^{13}\text{C}$  NMR (150 MHz,  $\text{DMSO-}d_6$ ):  $\delta$  171.1, 140.0, 136.6, 129.1, 128.7, 127.7, 126.5, 124.3, 121.4, 119.2, 118.7, 111.7, 109.3, 40.8, 35.6, 33.2. HRMS:  $[\text{M}+\text{H}]^+$  calcd for  $\text{C}_{18}\text{H}_{19}\text{N}_2\text{O}$  279.1492, found 279.1498.

#### N-Cyclohexyl-2-(1H-indol-3-yl)-acetamide (P45)

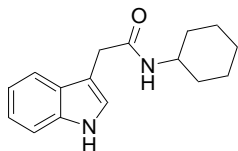

Light pink solid, mp: 159-161 °C, purified by silica gel chromatography (dichloromethane/methanol = 100:1), 83% yield, 107 mg.  $^1\text{H}$  NMR (600 MHz,  $\text{DMSO-}d_6$ ):  $\delta$  10.81 (s, 1H), 7.78 (d,  $J = 3.0$  Hz, 1H), 7.56 (d,  $J = 3.0$  Hz, 1H), 7.34 (d,  $J = 3.0$  Hz, 1H), 7.16 (s, 1H), 7.05-7.07 (m, 1H), 6.95-6.98 (m, 1H), 3.52-3.55 (m, 1H), 3.47 (s, 2H), 1.72 (d,  $J = 6.0$  Hz, 2H), 1.66 (d,  $J = 6.0$  Hz, 2H), 1.54 (d,  $J = 6.0$  Hz, 1H), 1.21-1.27 (m, 2H), 1.11-1.18 (m, 3H).  $^{13}\text{C}$  NMR (150 MHz,  $\text{DMSO-}d_6$ ):  $\delta$  170.1, 136.6, 127.7, 124.0, 121.3, 119.2, 118.7, 111.7, 109.7, 48.0, 33.3, 33.0, 25.7, 25.0. HRMS:  $[\text{M}-\text{H}]^-$  calcd for  $\text{C}_{16}\text{H}_{19}\text{N}_2\text{O}$  255.1503, found 255.1506.

#### 2-(1-Methyl-1H-indol-3-yl)-N-p-tolyl-acetamide (P46)

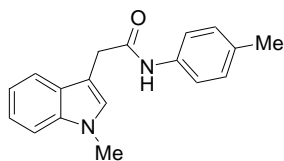

White solid, mp: 145-147 °C, purified by silica gel chromatography (petroleum ether/ethyl acetate = 5:1), 95% yield, 132 mg.  $^1\text{H}$  NMR (400 MHz,  $\text{DMSO-}d_6$ ):  $\delta$  10.02 (s, 1H), 7.62 (d,  $J = 2.0$  Hz, 1H), 7.49 (d,  $J = 2.0$  Hz, 2H), 7.39 (d,  $J = 2.0$  Hz, 1H), 7.23 (s, 1H), 7.12-7.15 (m, 1H), 7.08 (d,  $J = 4.0$  Hz, 2H), 7.01-7.03 (m, 1H), 3.75 (s, 3H), 3.70 (s, 2H), 2.23 (s, 3H).  $^{13}\text{C}$  NMR (100 MHz,  $\text{DMSO-}d_6$ ):  $\delta$  169.8, 137.3, 137.0, 132.4, 129.5, 128.6, 128.0, 121.6, 119.6, 119.4, 118.9, 110.0, 108.4, 34.0, 32.7, 20.9. HRMS:  $[\text{M}-\text{H}]^-$  calcd for  $\text{C}_{18}\text{H}_{17}\text{N}_2\text{O}$  277.1346, found 277.1345.

#### 2-Thiophen-3-yl-N-p-tolyl-acetamide (P47)

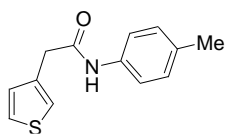

Gray solid, mp: 136-138 °C, purified by silica gel chromatography (petroleum ether/ethyl acetate = 10:1), 99% yield, 115 mg.  $^1\text{H}$  NMR (600 MHz,  $\text{DMSO-}d_6$ ):  $\delta$  10.04 (s, 1H), 7.48 (d,  $J = 3.0$  Hz, 3H), 7.31 (s, 1H), 7.10 (d,  $J = 3.0$  Hz, 3H), 3.63 (s, 2H), 2.24 (s, 3H).  $^{13}\text{C}$  NMR (150 MHz,  $\text{DMSO-}d_6$ ):  $\delta$  168.9, 137.2, 136.2, 132.6, 129.5, 129.2, 126.2, 122.9, 119.6, 38.5, 20.9. HRMS:  $[\text{M}+\text{Na}]^+$  calcd for  $\text{C}_{13}\text{H}_{13}\text{NOS}$  254.0610, found 254.0614.

#### N-(adamantan-1-yl)-2-(thiophen-3-yl)acetamide (P48)

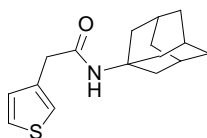

Light yellow solid, mp: 147-149 °C, purified by silica gel chromatography



(petroleum ether/ethyl acetate = 8:1), 62% yield, 86 mg.  $^1\text{H NMR}$  (600 MHz,  $\text{DMSO-}d_6$ ):  $\delta$  7.59 (s, 1H), 7.33 (d,  $J = 3.0$  Hz, 1H), 6.92-6.94 (m, 1H), 6.86 (d,  $J = 1.5$  Hz, 1H), 3.56 (s, 2H), 2.00 (s, 3H), 1.91 (s, 6H), 1.61 (s, 6H).  $^{13}\text{C NMR}$  (150 MHz,  $\text{DMSO-}d_6$ ):  $\delta$  168.7, 138.9, 126.9, 126.1, 125.1, 51.2, 41.4, 37.9, 36.5, 29.2. HRMS:  $[\text{M}+\text{H}]^+$  calcd for  $\text{C}_{16}\text{H}_{22}\text{NOS}$  276.1417, found 276.1413.

### 2-Dimethylamino-N-p-tolyl-acetamide (P49)

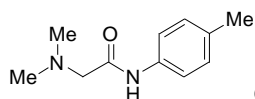

Colorless oil, purified by silica gel chromatography (petroleum ether/ethyl acetate = 2:1), 96% yield, 92 mg.  $^1\text{H NMR}$  (600 MHz,  $\text{DMSO-}d_6$ ):  $\delta$  9.60 (s, 1H), 7.53 (d,  $J = 3.0$  Hz, 2H), 7.10 (d,  $J = 3.0$  Hz, 2H), 3.03 (s, 2H), 2.26 (s, 6H), 2.24 (s, 3H).  $^{13}\text{C NMR}$  (150 MHz,  $\text{DMSO-}d_6$ ):  $\delta$  168.8, 136.6, 132.7, 129.5, 119.9, 63.7, 45.8, 20.9. HRMS:  $[\text{M}+\text{Na}]^+$  calcd for  $\text{C}_{11}\text{H}_{16}\text{N}_2\text{ONa}$  215.1155, found 215.1156.

### 2-(1H-Indol-3-yl)-2-oxo-N-p-tolyl-acetamide (P50)

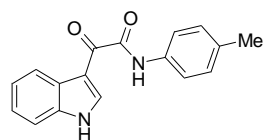

Known compound,<sup>[14]</sup> light brown solid, mp: 254-256 °C, purified by silica gel chromatography (petroleum ether/ethyl acetate = 8:1), 75% yield, 105 mg.  $^1\text{H NMR}$  (400 MHz,  $\text{DMSO-}d_6$ ):  $\delta$  12.34 (s, 1H), 10.59 (s, 1H), 8.77 (s, 1H), 8.28-8.30 (m, 1H), 7.75 (d,  $J = 4.0$  Hz, 2H), 7.55-7.58 (m, 1H), 7.29-7.31 (m, 2H), 7.18 (d,  $J = 4.0$  Hz, 2H), 2.29 (s, 3H).  $^{13}\text{C NMR}$  (100 MHz,  $\text{DMSO-}d_6$ ):  $\delta$  182.5, 162.6, 139.0, 136.8, 136.0, 133.7, 129.6, 126.6, 124.0, 123.2, 121.7, 120.7, 113.1, 112.4, 21.0.

### N-(4-Chloro-phenyl)-2-(1H-indol-3-yl)-2-oxo-acetamide (P51)

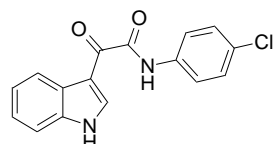

Known compound,<sup>[15]</sup> light green solid, mp: 268-270 °C, purified by silica gel chromatography (petroleum ether/ethyl acetate = 5:1), 50% yield, 76 mg.  $^1\text{H NMR}$  (400 MHz,  $\text{DMSO-}d_6$ ):  $\delta$  12.36 (s, 1H), 10.85 (s, 1H), 8.76 (s, 1H), 8.28-8.30 (m, 1H), 7.91 (d,  $J = 4.0$  Hz, 2H), 7.56-7.59 (m, 1H), 7.45 (d,  $J = 4.0$  Hz, 2H), 7.28-7.32 (m, 2H).  $^{13}\text{C NMR}$  (100 MHz,  $\text{DMSO-}d_6$ ):  $\delta$  182.1, 162.8, 139.1, 137.5, 136.9, 129.1, 128.4, 126.6, 124.1, 123.2, 122.3, 121.7, 113.2, 112.4.

### But-2-ynoic acid p-tolylamide (P52)

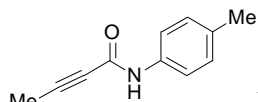

Light yellow solid, mp: 129-131 °C, purified by silica gel chromatography (petroleum ether/ethyl acetate = 8:1), 86% yield, 75 mg.  $^1\text{H NMR}$  (600 MHz,  $\text{DMSO-}d_6$ ):  $\delta$  10.51 (s, 1H), 7.48 (d,  $J = 3.0$  Hz, 2H), 7.11 (d,  $J = 3.0$  Hz, 2H), 2.24 (s, 3H), 2.03 (s, 3H).  $^{13}\text{C NMR}$  (150 MHz,  $\text{DMSO-}d_6$ ):  $\delta$  150.8, 136.6, 133.3, 129.6, 119.9, 84.3, 76.5, 20.9, 3.7. HRMS:  $[\text{M}+\text{H}]^+$  calcd for  $\text{C}_{11}\text{H}_{12}\text{NO}$  174.0913, found 174.0915.

### 2-(2,4-Dichloro-phenoxy)-N-prop-2-ynyl-propionamide (P53)

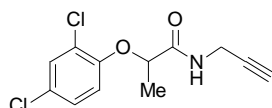

White solid, mp: 106-107 °C, purified by silica gel chromatography (petroleum ether/ethyl acetate = 10:1), 86% yield, 117 mg. <sup>1</sup>H NMR (600 MHz, DMSO-*d*<sub>6</sub>): δ 8.53-8.54 (m, 1H), 7.59 (d, *J* = 1.5 Hz, 1H), 7.34 (d, *J* = 6.0 Hz, 1H), 6.96 (d, *J* = 6.0 Hz, 1H), 4.76-4.79 (m, 1H), 3.87-3.89 (m, 2H), 3.10-3.11 (m, 1H), 1.45 (d, *J* = 3.0 Hz, 3H). <sup>13</sup>C NMR (150 MHz, DMSO-*d*<sub>6</sub>): δ 170.5, 152.4, 130.0, 128.5, 125.8, 123.7, 116.7, 81.2, 75.4, 73.5, 28.5, 18.9. HRMS: [M-H]<sup>-</sup> calcd for C<sub>12</sub>H<sub>10</sub>Cl<sub>2</sub>NO<sub>2</sub> 270.0094, found 270.0094.

### N-methoxy-N-methyl-2-(p-tolyl)acetamide (P54)

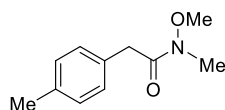

Known compound, <sup>[11]</sup> colorless oil, purified by silica gel chromatography (petroleum ether / ethyl acetate = 15:1). 87% yield, 84 mg. <sup>1</sup>H NMR (400 MHz, DMSO-*d*<sub>6</sub>): δ 7.08-7.13 (m, 4H), 3.66 (s, 2H), 3.65 (s, 3H), 3.09 (s, 3H), 2.27 (s, 3H). <sup>13</sup>C NMR (100 MHz, DMSO-*d*<sub>6</sub>): δ 172.0, 135.9, 132.7, 129.7, 129.2, 61.6, 38.4, 32.3, 21.1.

### 2.3 General Procedure for Synthesis of lactams (P55-P57)

To a 10 mL tube were added substrate (0.5 mmol, 1.0 equiv.), (*o*-CF<sub>3</sub>PhO)<sub>3</sub>P (257 mg, 0.5 mmol, 1.0 equiv.) and CH<sub>3</sub>CN (0.5 mL). The mixture was warmed to 80 °C in an oil bath and stirred for the indicated reaction time using magnetic stirring. Then, the solvent was concentrated under reduced pressure and the crude product was further purified by column chromatography on silica gel to give the pure product (P55-P57).

#### 1,4-Dihydro-2H-isoquinolin-3-one (P55)

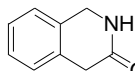

Light yellow solid, mp: 132-134 °C, purified by silica gel chromatography (petroleum ether/ethyl acetate = 1:2), 82% yield, 60 mg. <sup>1</sup>H NMR (600 MHz, DMSO-*d*<sub>6</sub>): δ 7.99 (s, 1H), 7.19-7.26 (m, 4H), 4.32 (s, 2H), 3.43 (s, 2H). <sup>13</sup>C NMR (150 MHz, DMSO-*d*<sub>6</sub>): δ 170.9, 133.4, 133.2, 127.7, 127.4, 126.6, 125.8, 44.6, 37.3. HRMS: [M+H]<sup>+</sup> C<sub>9</sub>H<sub>10</sub>NO calcd for 148.0757, found 148.0745.

#### (2-Oxo-piperidin-3-yl)-carbamic acid benzyl ester (P56)

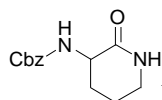

White solid, mp: 88-90 °C, purified by silica gel chromatography (ethyl acetate), 99% yield, 123 mg. <sup>1</sup>H NMR (600 MHz, DMSO-*d*<sub>6</sub>): δ 7.53 (s, 1H), 7.36 (s, 5H), 7.31 (s, 1H), 5.02 (s, 2H), 3.89 (s, 1H), 3.10 (s, 2H), 1.95 (s, 1H), 1.66-1.77 (m, 3H). <sup>13</sup>C NMR (150 MHz, DMSO-*d*<sub>6</sub>): δ 170.3, 156.5, 137.6, 128.8, 128.2, 65.7, 51.2, 41.5, 28.3, 21.7. HRMS: [M+Na]<sup>+</sup> calcd for C<sub>13</sub>H<sub>16</sub>N<sub>2</sub>O<sub>3</sub>Na 271.1053, found 271.1053.

#### (2-Oxo-azepan-3-yl)-carbamic acid benzyl ester (P57)

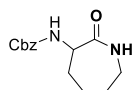

White solid, mp: 118-120 °C, purified by silica gel chromatography (petroleum

ether/ethyl acetate = 2:1), 73% yield, 96 mg. <sup>1</sup>H NMR (600 MHz, DMSO-*d*<sub>6</sub>): δ 7.75-7.76 (m, 1H), 7.36 (d, *J* = 3.0 Hz, 4H), 7.30-7.32 (m, 1H), 7.00 (d, *J* = 3.0 Hz, 1H), 5.02 (s, 2H), 4.16-4.19 (m, 1H), 3.13-3.19 (m, 1H), 3.03-3.06 (m, 1H), 1.86-1.88 (m, 1H), 1.78 (d, *J* = 6.0 Hz, 1H), 1.71-1.74 (m, 1H), 1.59-1.66 (m, 1H), 1.39-1.46 (m, 1H), 1.16-1.22 (m, 1H). <sup>13</sup>C NMR (150 MHz, DMSO-*d*<sub>6</sub>): δ 174.6, 155.7, 137.6, 128.8, 128.2, 128.1, 65.7, 53.6, 41.0, 31.3, 29.3, 28.0. HRMS: [M+Na]<sup>+</sup> calcd for C<sub>14</sub>H<sub>18</sub>N<sub>2</sub>O<sub>3</sub>Na 285.1210, found 285.1210.

## 2.4 General Procedure for Synthesis of amides containing chiral center (**P58-P62**)

To a 10 mL tube were added amine (0.5 mmol, 1.0 equiv.), carboxylic acid (0.5 mmol, 1.0 equiv.), (*o*-CF<sub>3</sub>PhO)<sub>3</sub>P (257 mg, 0.5 mmol, 1.0 equiv.) and CH<sub>3</sub>CN (0.5 mL). The mixture was warmed to 80 °C in an oil bath and stirred for the indicated reaction time using magnetic stirring. Then, the solvent was concentrated under reduced pressure and the crude product was further purified by column chromatography on silica gel to give the pure product (**P58-P62**). The er values of all compounds were determined by HPLC with a chiral column with Chirasil OD-H column (25 cm × 4.6 mm), Chirasil IC column (25 cm × 4.6 mm).

### (*S*)-2-Benzoylamino-3-phenyl-propionic acid methyl ester (**P58**)

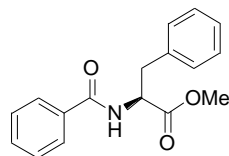

Known compound,<sup>[17]</sup> white solid, mp: 79-81 °C, purified by silica gel chromatography (petroleum ether/ethyl acetate = 8:1), 87% yield, 123 mg, > 99% er. <sup>1</sup>H NMR (400 MHz, DMSO-*d*<sub>6</sub>): δ 8.88 (d, *J* = 2.0 Hz, 1H), 7.80 (d, *J* = 2.0 Hz, 2H), 7.52-7.55 (m, 1H), 7.45-7.47 (m, 2H), 7.31 (d, *J* = 4.0 Hz, 2H), 7.27-7.29 (m, 2H), 7.18-7.21 (m, 1H), 4.65-4.68 (m, 1H), 3.64 (s, 3H), 3.08-3.19 (m, 2H). <sup>13</sup>C NMR (100 MHz, DMSO-*d*<sub>6</sub>): δ 172.7, 166.9, 138.2, 134.1, 132.0, 129.5, 128.7, 128.7, 127.8, 126.9, 54.75, 52.4, 36.7.

### Methyl-(4-chlorobenzoyl)-L-leucinate (**P59**)

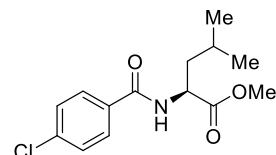

White solid, mp: 85-87 °C, purified by silica gel chromatography (petroleum ether/ethyl acetate = 10:1), 99% yield, 141 mg, > 99% er. <sup>1</sup>H NMR (600 MHz, DMSO-*d*<sub>6</sub>): δ 8.83 (d, *J* = 3.0 Hz, 1H), 7.92 (d, *J* = 3.0 Hz, 2H), 7.57 (d, *J* = 3.0 Hz, 2H), 4.48-4.52 (m, 1H), 3.65 (s, 3H), 1.76-1.81 (m, 1H), 1.66-1.72 (m, 1H), 1.56-1.60 (m, 1H), 0.93 (d, *J* = 3.0 Hz, 3H), 0.88 (d, *J* = 6.0 Hz, 3H). <sup>13</sup>C NMR (150 MHz, DMSO-*d*<sub>6</sub>): δ 173.5, 166.0, 136.8, 132.9, 129.9, 128.9, 52.4, 51.5, 24.9, 23.3, 21.6. HRMS: [M+Na]<sup>+</sup> calcd for C<sub>14</sub>H<sub>18</sub>ClNO<sub>3</sub>Na 306.0867, found 306.0863.

### (*R*)-2-p-Tolylcarbamoyl-pyrrolidine-1-carboxylic acid tert-butyl ester (**P60**)

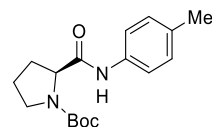

Known compound,<sup>[18]</sup> white solid, mp: 166-168 °C, purified by silica gel chromatography (petroleum ether/ethyl acetate = 8:1), 87% yield, 133 mg, > 99% er. <sup>1</sup>H NMR (600 MHz, DMSO-*d*<sub>6</sub>): δ 9.87 (s, 1H), 7.49 (d, *J* = 3.0 Hz, 2H), 7.10 (d, *J* = 6.0 Hz, 2H), 4.17-4.24 (m,

1H), 3.31-3.43 (m, 2H), 2.24 (s, 3H), 2.11-2.20 (m, 1H), 1.84-1.92 (m, 2H), 1.76-1.82 (m, 1H), 1.40 (s, 3H), 1.27 (s, 6H). <sup>13</sup>C NMR (150 MHz, DMSO-*d*<sub>6</sub>): δ 171.7, 153.6, 137.0, 132.5, 129.5, 119.7, 78.9, 60.8, 47.0, 31.5, 28.4, 23.9, 20.9.

**(R)-[Phenyl-(3-trifluoromethyl-phenylcarbamoyl)-methyl]-carbamic acid benzyl ester (P61)**

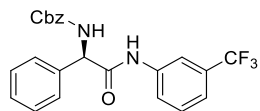

White solid, mp: 148-150 °C, purified by silica gel chromatography (petroleum ether/ethyl acetate = 5:1), 90% yield, 193 mg, > 99% er. <sup>1</sup>H NMR (600 MHz, DMSO-*d*<sub>6</sub>): δ 10.68 (s, 1H), 8.23 (d, *J* = 3.0 Hz, 1H), 8.10 (s, 1H), 7.80 (d, *J* = 3.0 Hz, 1H), 7.53-7.57 (m, 3H), 7.18-7.42 (m, 9H), 5.44 (d, *J* = 6.0 Hz, 1H), 5.09 (s, 2H). <sup>13</sup>C NMR (150 MHz, DMSO-*d*<sub>6</sub>): δ 170.0, 156.4, 140.0, 137.8, 137.3, 130.6, 130.0 (q, *J*<sub>C-F</sub> = 63.0 Hz), 129.0, 128.8, 128.5, 128.3, 128.2, 128.0, 125.5 (d, *J*<sub>C-F</sub> = 271.5 Hz), 123.2, 120.4, 115.7, 66.2, 59.6. HRMS: [M+Na]<sup>+</sup> calcd for C<sub>23</sub>H<sub>19</sub>N<sub>2</sub>O<sub>3</sub>F<sub>3</sub>Na 451.1240, found 451.1246.

**(R)-[2-(4-Benzyloxy-phenyl)-1-(4-methoxy-phenylcarbamoyl)-ethyl]-carbamic acid tert-butyl ester (P62)**

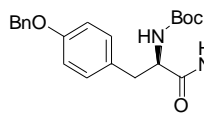

White solid, mp: 158-160 °C, purified by silica gel chromatography (petroleum ether/ethyl acetate = 5:1), 70% yield, 167 mg, > 99% er. <sup>1</sup>H NMR (600 MHz, DMSO-*d*<sub>6</sub>): δ 9.86 (s, 1H), 7.49 (d, *J* = 3.0 Hz, 2H), 7.43 (d, *J* = 6.0 Hz, 2H), 7.37-7.39 (m, 2H), 7.31-7.33 (m, 1H), 7.22 (d, *J* = 6.0 Hz, 2H), 7.02 (d, *J* = 3.0 Hz, 1H), 6.92 (d, *J* = 6.0 Hz, 2H), 6.89 (d, *J* = 3.0 Hz, 2H), 5.05 (s, 2H), 4.24 (s, 1H), 3.72 (s, 3H), 2.90-2.93 (m, 1H), 2.75-2.79 (m, 1H), 1.32 (s, 9H). <sup>13</sup>C NMR (150 MHz, DMSO-*d*<sub>6</sub>): δ 170.8, 157.4, 155.8, 155.7, 137.7, 132.5, 130.7, 130.6, 128.9, 128.2, 128.1, 121.3, 114.8, 114.3, 78.5, 69.6, 57.1, 55.6, 37.2, 28.6. HRMS: [M+Na]<sup>+</sup> calcd for C<sub>28</sub>H<sub>32</sub>N<sub>2</sub>O<sub>5</sub>Na 499.2203, found 499.2201.

**2.5 General Procedure for Synthesis of dipeptides (P63-P67)**

To a 10 mL tube were added amine (0.5 mmol, 1.0 equiv.), carboxylic acid (0.5 mmol, 1.0 equiv.), (*o*-CF<sub>3</sub>PhO)<sub>3</sub>P (386 mg, 0.75 mmol, 1.0 equiv.) and CH<sub>3</sub>CN (0.5 mL). The mixture was warmed to 100 °C in an oil bath and stirred for the indicated reaction time using magnetic stirring. Then, the solvent was concentrated under reduced pressure and the crude product was further purified by column chromatography on silica gel to give the pure product (P63-P67). The er values of all compounds were determined by HPLC with a chiral column with Chirasil OD-H column (25 cm × 4.6 mm), Chirasil IC column (25 cm × 4.6 mm).

**(R)-2-((S)-3-(4-(benzyloxy)phenyl)-2-((tert-butoxycarbonyl)amino)propanamido)-2-phenylacetate (P63)**

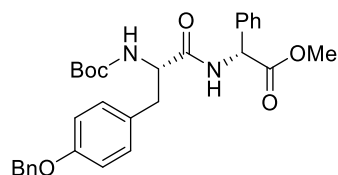

White solid, mp: 104-106 °C, purified by silica gel chromatography (petroleum ether/ethyl acetate = 2:1), 69% yield, 179 mg, 99% er. <sup>1</sup>H NMR (600 MHz, DMSO-*d*<sub>6</sub>):

$\delta$  8.72-8.79 (m, 1H), 7.37-7.44 (m, 9H), 7.31-7.33 (m, 1H), 7.21-7.26 (m, 2H), 6.90-6.93 (m, 2H), 5.42-5.47 (m, 1H), 5.06 (s, 2H), 4.17-4.27 (m, 1H), 3.63 (s, 3H), 2.90-2.96 (m, 1H), 2.67-2.71 (m, 1H), 1.29 (s, 9H).  $^{13}\text{C}$  NMR (150 MHz, DMSO- $d_6$ ):  $\delta$  172.5, 171.4, 157.4, 155.8, 137.7, 136.5, 130.7, 130.7, 129.2, 128.9, 128.8, 128.2, 128.2, 128.1, 114.8, 78.5, 69.6, 56.7, 56.0, 52.8, 36.9, 28.6. HRMS:  $[\text{M}+\text{H}]^+$  calcd for  $\text{C}_{30}\text{H}_{35}\text{N}_2\text{O}_6$  519.2490, found 519.2485.

**(2-tert-Butoxycarbonylamino-3-phenyl-propionylamino)-phenyl-acetic acid methyl ester (P64)**

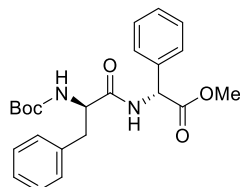

Known compound,<sup>[19]</sup> white solid, mp: 150-152 °C, purified by silica gel chromatography (petroleum ether/ethyl acetate = 5:1), 60% yield, 124 mg, 94% er.  $^1\text{H}$  NMR (400 MHz, DMSO- $d_6$ ):  $\delta$  8.74-8.81 (m, 1H), 7.17-7.42 (m, 10H), 6.92-6.98 (m, 1H), 5.42-5.45 (m, 1H), 4.22-4.36 (m, 1H), 3.64 (d,  $J$  = 4.0 Hz, 3H), 2.87-3.03 (m, 1H), 2.67-2.77 (m, 1H), 1.28 (s, 9H).  $^{13}\text{C}$  NMR (100 MHz, DMSO- $d_6$ ):  $\delta$  172.4, 171.4, 155.7, 138.6, 136.9, 129.7, 129.2, 128.8, 128.4, 127.9, 126.6, 78.5, 56.7, 55.8, 52.8, 37.8, 28.6.

**2-(2-tert-Butoxycarbonylamino-4-methylsulfanyl-butrylamino)-3-phenyl-propionic acid benzyl ester (P65)**

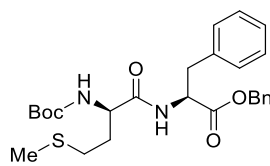

White solid, mp: 100-102 °C, purified by silica gel chromatography (petroleum ether/ethyl acetate = 5:1), 75% yield, 182 mg, >99% er.  $^1\text{H}$  NMR (400 MHz, DMSO- $d_6$ ):  $\delta$  8.28 (d,  $J$  = 4.0 Hz, 1H), 7.32-7.37 (m, 3H), 7.19-7.27 (m, 7H), 6.92 (d,  $J$  = 2.0 Hz, 1H), 5.02-5.10 (m, 2H), 4.51-4.56 (m, 1H), 3.97-4.05 (m, 1H), 2.95-3.07 (m, 2H), 2.33-2.41 (m, 2H), 1.99 (s, 3H), 1.67-1.77 (m, 2H), 1.36 (s, 9H).  $^{13}\text{C}$  NMR (100 MHz, DMSO- $d_6$ ):  $\delta$  172.3, 171.7, 155.7, 137.4, 136.1, 129.6, 128.8, 128.7, 128.5, 128.3, 127.0, 78.6, 66.5, 54.0, 53.8, 37.0, 32.3, 30.1, 28.6, 15.1. HRMS:  $[\text{M}-\text{H}]^-$  calcd for  $\text{C}_{26}\text{H}_{33}\text{N}_2\text{O}_5\text{S}$  485.2116, found 485.2122.

**2-(2-Benzoyloxycarbonylamino-propionylamino)-3-phenyl-propionic acid benzyl ester (P66)**

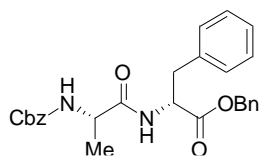

White solid, mp: 109-111 °C, purified by silica gel chromatography (petroleum ether/ethyl acetate = 3:1), 93% yield, 214 mg, >99% er.  $^1\text{H}$  NMR (400 MHz, DMSO- $d_6$ ):  $\delta$  8.35 (d,  $J$  = 4.0 Hz, 1H), 7.18-7.38 (m, 16H), 5.08-5.15 (m, 2H), 4.97-5.05 (m, 2H), 4.53-4.58 (m, 1H), 4.03-4.10 (m, 1H), 3.05-3.10 (m, 1H), 2.89-2.94 (m, 1H), 1.01 (d,  $J$  = 4.0 Hz, 3H).  $^{13}\text{C}$  NMR (100 MHz, DMSO- $d_6$ ):  $\delta$  173.0, 171.7, 156.0, 137.5, 137.4, 136.2, 129.7, 128.9, 128.8, 128.6, 128.5, 128.3, 128.2, 128.2, 127.0, 66.5, 65.8, 53.8, 50.3, 37.3, 18.8. HRMS:  $[\text{M}+\text{Na}]^+$  calcd for  $\text{C}_{27}\text{H}_{28}\text{N}_2\text{O}_5\text{Na}$  483.1890, found 483.1889.

## 2-(2-Benzoyloxycarbonylamino-3-phenyl-propionylamino)-propionic acid methyl ester (P67)

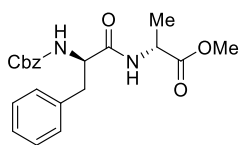

Known compound,<sup>[20]</sup> white solid, mp: 127-129 °C, purified by silica gel chromatography (petroleum ether/ethyl acetate = 3:1), 87% yield, 167 mg, 98% er. <sup>1</sup>H NMR (400 MHz, DMSO-*d*<sub>6</sub>): δ 8.46 (d, *J* = 2.0 Hz, 1H), 7.48 (d, *J* = 4.0 Hz, 1H), 7.20-7.34 (m, 10H), 4.93-4.98 (m, 2H), 4.26-4.34 (m, 2H), 3.64 (s, 3H), 2.94-2.97 (m, 1H), 2.74-2.78 (m, 1H), 1.24 (d, *J* = 2.0 Hz, 3H). <sup>13</sup>C NMR (100 MHz, DMSO-*d*<sub>6</sub>): δ 173.4, 172.1, 156.3, 138.6, 137.5, 129.7, 128.7, 128.5, 128.1, 127.9, 126.7, 65.6, 56.3, 52.4, 48.1, 37.8, 17.3.

### 3. PMI calculations

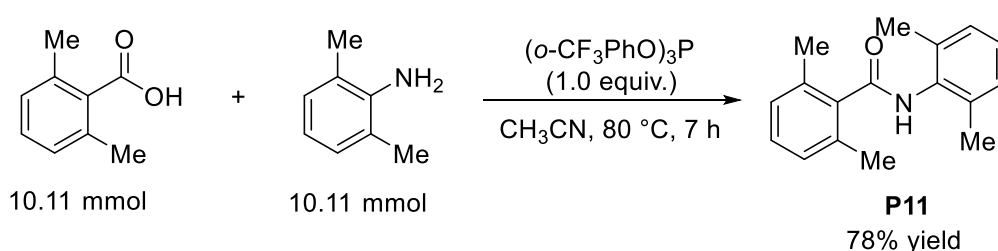

To a 25 mL round-bottom flask were added 2,6-dimethylbenzoic acid (10.11 mmol, 1.52 g, 1.0 equiv.), 2,6-dimethylaniline (10.11 mmol, 1.23 g, 1.0 equiv.), (*o*-CF<sub>3</sub>PhO)<sub>3</sub>P (10.11 mmol, 5.20 g, 1.0 equiv.) and CH<sub>3</sub>CN (10 mL). The mixture was warmed to 80 °C in an oil bath and stirred for 7 h using magnetic stirring. The reaction was cooled down to room temperature and lots of white solid were precipitated. The mixture was further stored at 0 °C for 0.5 h. Then, the solid was filtered and recrystallized by hexane to give pure product **P11** (78%, 2.00 g).

**Table S1.** PMI calculation for **P11** purified from recrystallization

|                        |                                                             | Equivalents<br>used | MW<br>(g / mol) | mmol  | g    | Density<br>g / mL | Volume<br>(mL) |
|------------------------|-------------------------------------------------------------|---------------------|-----------------|-------|------|-------------------|----------------|
| Reactants              | 2,6-dimethylbenzoic acid                                    | 1.0                 | 150.07          | 10.11 | 1.52 |                   |                |
|                        | 2,6-dimethylaniline                                         | 1.0                 | 121.09          | 10.11 | 1.23 |                   |                |
|                        | ( <i>o</i> -CF <sub>3</sub> PhO) <sub>3</sub> P             | 1.0                 | 514.04          | 10.11 | 5.20 |                   |                |
| Auxiliary<br>materials | CH <sub>3</sub> CN                                          |                     | 101.19          |       | 7.86 | 0.7857            | 10             |
|                        | Hexane                                                      |                     |                 |       | 6.60 | 0.66              | 10             |
| Product                | N-(2,6-dimethylphenyl)-2,6-dimethylbenzamide ( <b>P11</b> ) |                     | 253.15          | 7.90  | 2.00 |                   |                |
| PMI                    |                                                             |                     | 11.2            |       |      |                   |                |

## 4. Mechanistic studies

### 4.1 Control experiments

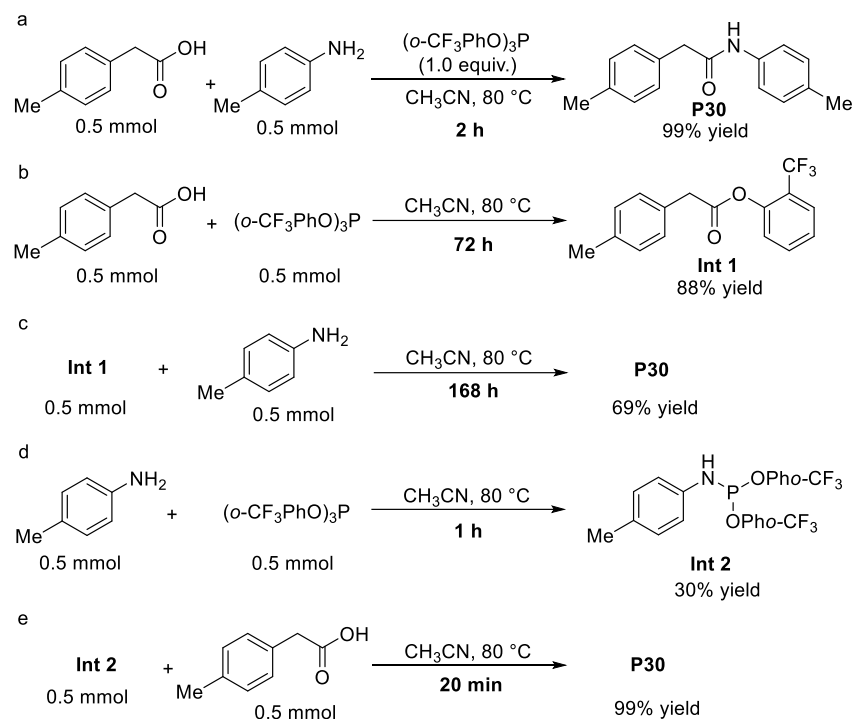

Scheme S1. Control experiments.

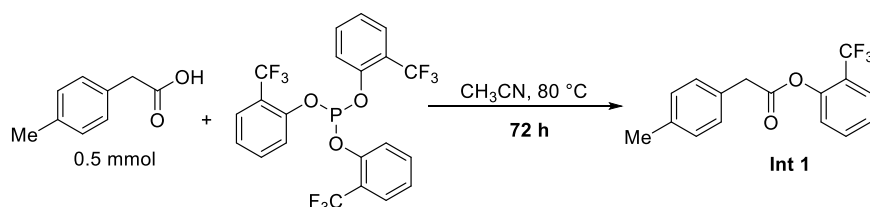

To a 10 mL tube were added *p*-methylphenylacetic acid (75 mg, 0.5 mmol, 1.0 equiv.), (*o*-CF<sub>3</sub>PhO)<sub>3</sub>P (257 mg, 0.5 mmol, 1.0 equiv.) and CH<sub>3</sub>CN (1 mL). The mixture was warmed to 80 °C in an oil bath and stirred for 72 h using magnetic stirring. Then, the solvent was concentrated under reduced pressure and the crude product was further purified by column chromatography on silica gel (petroleum ether/ethyl acetate = 30:1) to give the product (**Int 1**) as a colorless oil (129 mg, 88% yield). <sup>1</sup>H NMR (DMSO-*d*<sub>6</sub>, 600 MHz): δ 7.79 (d, *J* = 3.0 Hz, 1H), 7.73-7.76 (m, 1H), 7.47-7.50 (m, 1H), 7.41 (d, *J* = 3.0 Hz, 1H), 7.24 (d, *J* = 6.0 Hz, 2H), 7.18 (d, *J* = 3.0 Hz, 2H), 3.96 (s, 2H), 2.30 (s, 3H). <sup>13</sup>C NMR (150 MHz, DMSO): δ 170.3, 148.2, 136.7, 134.6, 130.6, 129.9, 129.5, 127.3 (dd, *J*<sub>C-F</sub> = 9.0 Hz, *J*<sub>C-F</sub> = 4.5 Hz), 127.1, 125.3, 124.3, 125.5, 121.9 (dd, *J*<sub>C-F</sub> = 60 Hz, *J*<sub>C-F</sub> = 30 Hz), 21.1. HRMS: [M-H]<sup>-</sup> calcd for C<sub>16</sub>H<sub>12</sub>O<sub>2</sub>F<sub>3</sub> 293.0795, found 293.0785.

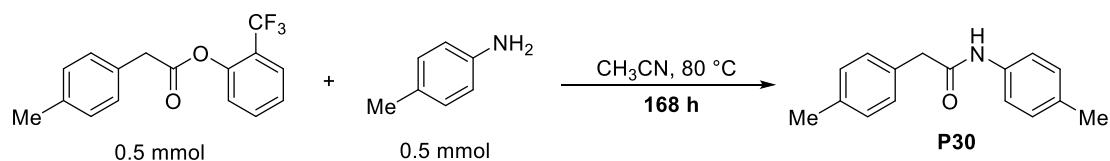

To a 10 mL tube were added 2-(trifluoromethyl)phenyl 2-(*p*-tolyl)acetate (147 mg, 0.5 mmol, 1.0 equiv.), *p*-toluidine (54 mg, 0.5 mmol, 1.0 equiv.) and CH<sub>3</sub>CN (1mL). The mixture was warmed to 80 °C in an oil bath and stirred for 168 h using magnetic stirring. Then, the solvent was concentrated under reduced pressure and the crude product was further purified by column chromatography on silica gel (petroleum ether/ethyl acetate = 5:1) to give **P30** in 69% yield (83 mg).

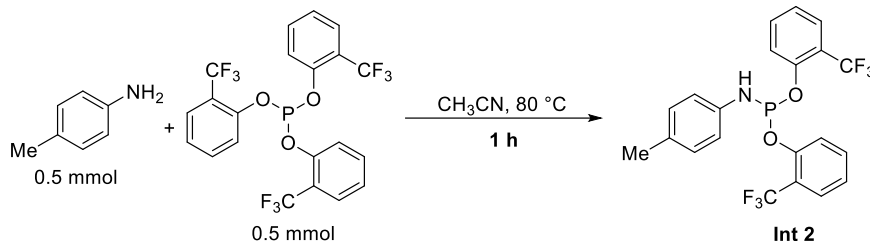

To a 10 mL tube were added *p*-toluidine (54 mg, 0.5 mmol, 1.0 equiv.), *p*-toluidine (54 mg, 0.5 mmol, 1.0 equiv.), (*o*-CF<sub>3</sub>PhO)<sub>3</sub>P (257 mg, 0.5 mmol, 1.0 equiv.) and CH<sub>3</sub>CN (1mL). The mixture was warmed to 80 °C in an oil bath and stirred for 1 h using magnetic stirring. Then, the solvent was concentrated under reduced pressure and the crude product was further purified by column chromatography on silica gel (petroleum ether/ethyl acetate = 30:1) to give (**Int 2** as colorless oil (67 mg, 30% yield). <sup>1</sup>H NMR (CDCl<sub>3</sub>-*d*<sub>6</sub>, 600 MHz): δ 7.62 (d, *J* = 2.0 Hz, 2H), 7.45-7.47 (m, 2H), 7.35 (d, *J* = 3.0 Hz, 2H), 7.15-7.18 (m, 2H), 7.05 (d, *J* = 6.0 Hz, 2H), 6.97 (d, *J* = 3.0 Hz, 2H), 5.41 (d, *J* = 3.0 Hz, 1H), 2.28 (s, 3H). <sup>13</sup>C NMR (150 MHz, CDCl<sub>3</sub>): δ 149.9, 136.5 (d, *J*<sub>C-F</sub> = 12.0 Hz), 132.2, 130.7, 128.9, 126.3 (d, *J*<sub>C-F</sub> = 4.5 Hz), 123.2, 122.2, 121.4, 119.5 (d, *J*<sub>C-F</sub> = 13.5 Hz), 117.7 (d, *J*<sub>C-F</sub> = 10.5 Hz), 19.6. HRMS: [M+Na]<sup>+</sup> calcd for C<sub>21</sub>H<sub>16</sub>NO<sub>2</sub>F<sub>6</sub>PNa 482.0715, found 482.0725.

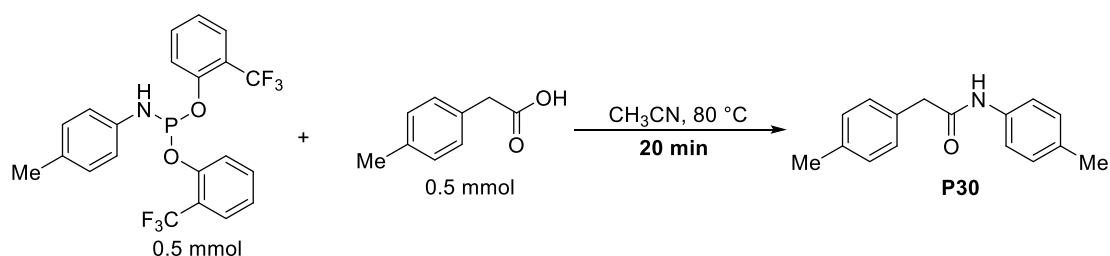

To a 10 mL tube were added *p*-methylphenylacetic acid (75 mg, 0.5 mmol, 1.0 equiv.), *p*-toluidine (54 mg, 0.5 mmol, 1.0 equiv.), bis(2-(trifluoromethyl)phenyl)*p*-tolylphosphoramidite (230 mg, 0.5 mmol, 1.0 equiv.) and CH<sub>3</sub>CN (1mL). The mixture was warmed to 80 °C in an oil bath and stirred for 20 min using magnetic stirring. Then, the solvent was concentrated under reduced pressure and the crude product was further purified by column chromatography on silica gel (petroleum ether/ethyl acetate = 5:1) to give **P30** in 99% yield (119 mg).

#### 4.2 DFT calculation.

Gaussian 16 (A.03) program package was employed for all calculations.<sup>[21]</sup> Geometry optimizations and the TS searches were calculated at the level of b3lyp/6-311g (d, p).<sup>[22,23]</sup> Frequency calculations at the reference T of 298 K were performed to characterize their thermodynamic properties at the same level with d3 dispersion correction.<sup>[24,25]</sup>



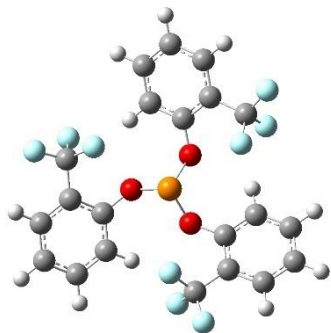

|   |             |             |             |
|---|-------------|-------------|-------------|
| P | -0.00008200 | -0.00101900 | 0.00936700  |
| O | -1.36938300 | -0.42084900 | -0.84594500 |
| O | 1.04826700  | -0.97652100 | -0.84629500 |
| O | 0.32047600  | 1.39514400  | -0.84546700 |
| C | 2.39388500  | -1.04533300 | -0.53632400 |
| C | 3.23760200  | 0.00624600  | -0.87247900 |
| C | 2.90254800  | -2.19704000 | 0.07553900  |
| C | 4.59671900  | -0.08554500 | -0.59039300 |
| H | 2.81634900  | 0.88301400  | -1.34132600 |
| C | 4.26859700  | -2.28108800 | 0.34119000  |
| C | 5.11523600  | -1.22728700 | 0.01360500  |
| H | 5.24701100  | 0.74257300  | -0.84480400 |
| H | 4.65918400  | -3.17256400 | 0.81221900  |
| H | 6.17357000  | -1.29992200 | 0.23031400  |
| C | -0.29166700 | 2.59484200  | -0.53317100 |
| C | 0.45324700  | 3.61078900  | 0.07716700  |
| C | -1.62514600 | 2.79997500  | -0.86535500 |
| C | -0.15621600 | 4.83563200  | 0.34553400  |
| C | -2.22438500 | 4.02270400  | -0.58064600 |
| H | -2.17523700 | 1.99701600  | -1.33295500 |
| C | -1.49311700 | 5.04216800  | 0.02200300  |
| H | 0.42190900  | 5.61932200  | 0.81538700  |
| H | -3.26745900 | 4.17196000  | -0.83184400 |
| H | -1.95875400 | 5.99486300  | 0.24077600  |
| C | -2.10272600 | -1.55074000 | -0.53438600 |
| C | -3.35559500 | -1.41333900 | 0.07473600  |
| C | -1.61374400 | -2.80826000 | -0.86637100 |
| C | -4.11213900 | -2.55340800 | 0.34230600  |
| C | -2.37362300 | -3.93839700 | -0.58249600 |
| H | -0.64310300 | -2.88343700 | -1.33348700 |
| C | -3.62260800 | -3.81457000 | 0.01911000  |
| H | -5.08034500 | -2.44434600 | 0.81117400  |
| H | -1.98146600 | -4.91642300 | -0.83361500 |
| H | -4.21531300 | -4.69402700 | 0.23720500  |
| C | 1.98931400  | -3.33512500 | 0.42758400  |

|   |             |             |             |
|---|-------------|-------------|-------------|
| C | -3.88512400 | -0.05226600 | 0.42157800  |
| C | 1.89656900  | 3.38870400  | 0.42458700  |
| F | 2.07537900  | 2.30060800  | 1.21103100  |
| F | 2.66427300  | 3.20014000  | -0.67731700 |
| F | 2.42586400  | 4.43750400  | 1.08687600  |
| F | 2.63437100  | -4.31625800 | 1.09093400  |
| F | 1.43991900  | -3.90840400 | -0.67182600 |
| F | 0.95917200  | -2.94410700 | 1.21518100  |
| F | -4.10389300 | 0.70706400  | -0.68056100 |
| F | -5.05907500 | -0.11817700 | 1.08207400  |
| F | -3.03331700 | 0.64641600  | 1.20940700  |

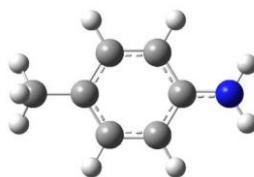

|   |             |             |             |
|---|-------------|-------------|-------------|
| C | -1.39879100 | 0.00000800  | -0.01192000 |
| C | -0.67036400 | -1.19223700 | -0.01017400 |
| C | 0.71848700  | -1.20259800 | -0.00192600 |
| C | 1.44233100  | 0.00000400  | 0.00376300  |
| C | 0.71849500  | 1.20260200  | -0.00192900 |
| C | -0.67036400 | 1.19224200  | -0.01017300 |
| H | -1.20064300 | -2.13947700 | -0.01739600 |
| H | 1.25248600  | -2.14748500 | -0.00476500 |
| H | 1.25248900  | 2.14749100  | -0.00477000 |
| H | -1.20063500 | 2.13948600  | -0.01739700 |
| C | -2.90707100 | -0.00000500 | 0.01442000  |
| H | -3.31352200 | -0.88277300 | -0.48545600 |
| H | -3.29197900 | -0.00042600 | 1.04062900  |
| H | -3.31351500 | 0.88317200  | -0.48473400 |
| N | 2.82094800  | -0.00000800 | 0.01030300  |
| H | 3.33616300  | -0.86031500 | 0.00468400  |
| H | 3.33617900  | 0.86029100  | 0.00472800  |

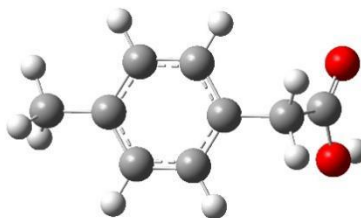

|   |             |             |             |
|---|-------------|-------------|-------------|
| C | -2.44494800 | 0.03126700  | -0.16203500 |
| C | -1.79575600 | -1.18539900 | 0.07042000  |
| C | -0.46447100 | -1.22375800 | 0.46783400  |
| C | 0.25745200  | -0.04295900 | 0.65061100  |

|   |             |             |             |   |             |             |             |
|---|-------------|-------------|-------------|---|-------------|-------------|-------------|
| C | -0.38096000 | 1.17393800  | 0.41184700  | C | 4.07046300  | 0.29293200  | -2.13851400 |
| C | -1.71397500 | 1.20790900  | 0.01305800  | C | 2.93695800  | 2.00621500  | -3.40775900 |
| H | -2.34049800 | -2.11467100 | -0.06176300 | H | 0.77413600  | 2.01413000  | -3.24227600 |
| H | 0.02150600  | -2.17859700 | 0.63545100  | C | 4.11907000  | 1.38991500  | -2.99666300 |
| H | 0.17186500  | 2.09917600  | 0.53098800  | H | 4.98160700  | -0.20005400 | -1.82088800 |
| H | -2.19341300 | 2.16464100  | -0.16462400 | H | 2.97117500  | 2.85961400  | -4.07815700 |
| C | -3.89323300 | 0.06292800  | -0.58090500 | H | 5.07806800  | 1.75908300  | -3.34587600 |
| H | -4.06452100 | -0.56369300 | -1.46077300 | C | -0.11958400 | 2.89810300  | 0.40375400  |
| H | -4.54260100 | -0.31230500 | 0.21628100  | C | 0.99396700  | 3.29822000  | 1.16329000  |
| H | -4.21432000 | 1.07767100  | -0.82251200 | C | -1.37738400 | 3.43648200  | 0.68063500  |
| C | 1.71842500  | -0.07561300 | 1.05460100  | C | 0.83301700  | 4.23818700  | 2.18281500  |
| H | 1.95687100  | -1.02439100 | 1.53670900  | C | -1.52687300 | 4.36431400  | 1.71000500  |
| H | 1.94625200  | 0.74197200  | 1.73868600  | H | -2.22324300 | 3.11490400  | 0.08969300  |
| C | 2.59220500  | 0.10231900  | -0.17062600 | C | -0.42449900 | 4.77035700  | 2.46137600  |
| O | 3.02391000  | 1.16567600  | -0.58541600 | H | 1.69806100  | 4.54288900  | 2.75991800  |
| O | 2.81233500  | -1.08026600 | -0.79941000 | H | -2.51234600 | 4.76870500  | 1.92164600  |
| H | 3.32047900  | -0.87687100 | -1.59866700 | H | -0.54003700 | 5.49533500  | 3.26086700  |
|   |             |             |             | C | -3.91430000 | 0.47990800  | 1.15443600  |
|   |             |             |             | C | 2.35026200  | 2.71900600  | 0.87481400  |
|   |             |             |             | C | 2.76529200  | -1.40740900 | -0.80280800 |
|   |             |             |             | F | 2.07591000  | -1.17979400 | 0.34051800  |
|   |             |             |             | F | 2.14682500  | -2.42700100 | -1.43900300 |
|   |             |             |             | F | 3.99061300  | -1.84435700 | -0.44120400 |
|   |             |             |             | F | -4.85772000 | 0.02917800  | 2.00633400  |
|   |             |             |             | F | -4.02419400 | 1.83012600  | 1.12330700  |
|   |             |             |             | F | -2.71314700 | 0.20136600  | 1.71978000  |
|   |             |             |             | F | 2.77461900  | 2.99900300  | -0.37478700 |
|   |             |             |             | F | 3.29019000  | 3.18989200  | 1.72575800  |
|   |             |             |             | F | 2.35466400  | 1.36766400  | 1.00131200  |
|   |             |             |             | C | 2.03878900  | -3.50875900 | 2.78261000  |
|   |             |             |             | C | 0.85707500  | -2.79135700 | 3.00687800  |
|   |             |             |             | C | -0.19265700 | -2.83050100 | 2.09372100  |
|   |             |             |             | C | -0.09102500 | -3.59272400 | 0.92453400  |
|   |             |             |             | C | 1.07651900  | -4.32731000 | 0.70689800  |
|   |             |             |             | C | 2.12517800  | -4.28693100 | 1.62401000  |
|   |             |             |             | H | 0.76230700  | -2.18768700 | 3.90659900  |
|   |             |             |             | H | -1.08918100 | -2.24357300 | 2.27234200  |
|   |             |             |             | H | 1.17509300  | -4.91999000 | -0.19867600 |
|   |             |             |             | H | 3.02933600  | -4.85899800 | 1.42979200  |
|   |             |             |             | C | 3.19868900  | -3.41458000 | 3.74288400  |
|   |             |             |             | H | 3.88025700  | -2.60338600 | 3.45432600  |
|   |             |             |             | H | 2.86003100  | -3.20823900 | 4.76367100  |
|   |             |             |             | H | 3.78362300  | -4.34032700 | 3.75897100  |
|   |             |             |             | C | -1.18104300 | -3.55751800 | -0.12355700 |
| P | -0.52968400 | 0.40714800  | -0.49380300 |   |             |             |             |
| O | 0.05573200  | 2.00702700  | -0.62229700 |   |             |             |             |
| O | -2.01625800 | 0.92805400  | -0.97141200 |   |             |             |             |
| O | 0.46710600  | -0.09085500 | -1.67186500 |   |             |             |             |
| C | -3.11278400 | 0.11085900  | -1.21803100 |   |             |             |             |
| C | -3.28217700 | -0.40694200 | -2.49593100 |   |             |             |             |
| C | -4.06406000 | -0.12019400 | -0.21561800 |   |             |             |             |
| C | -4.40941600 | -1.17490400 | -2.78375000 |   |             |             |             |
| H | -2.51243400 | -0.23133400 | -3.23686400 |   |             |             |             |
| C | -5.19009900 | -0.88910000 | -0.51853400 |   |             |             |             |
| C | -5.36299200 | -1.41822800 | -1.79649800 |   |             |             |             |
| H | -4.53226200 | -1.58950700 | -3.77929400 |   |             |             |             |
| H | -5.92750200 | -1.07032700 | 0.25417300  |   |             |             |             |
| H | -6.24021900 | -2.01801200 | -2.01688500 |   |             |             |             |
| C | 1.67017600  | 0.45590700  | -2.08860000 |   |             |             |             |
| C | 2.84315600  | -0.18565000 | -1.67942700 |   |             |             |             |
| C | 1.70418900  | 1.53906200  | -2.95549000 |   |             |             |             |

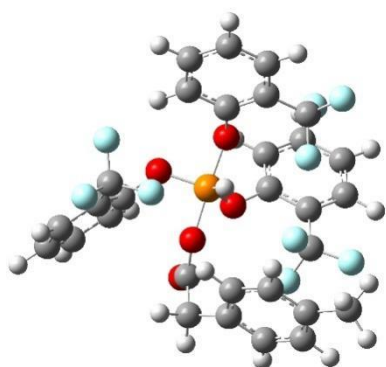

A

|   |             |             |             |   |            |             |            |
|---|-------------|-------------|-------------|---|------------|-------------|------------|
| H | -2.16966900 | -3.52315200 | 0.35212100  | C | 4.87240000 | 1.37847900  | 0.73671100 |
| H | -1.14634400 | -4.43407300 | -0.77403500 | C | 4.65629100 | -0.41915300 | 2.32554500 |
| C | -1.07539200 | -2.32559100 | -1.01588400 | H | 2.62857600 | -0.85320500 | 2.95066800 |
| O | -1.05133900 | -2.34068400 | -2.22181100 | C | 5.45935300 | 0.38898300  | 1.52207900 |
| O | -1.05537300 | -1.21485600 | -0.23843600 | H | 5.49025200 | 2.02573800  | 0.12566600 |
| H | -0.24506600 | 0.39196900  | 0.87074000  | H | 5.10203400 | -1.18337700 | 2.95540600 |

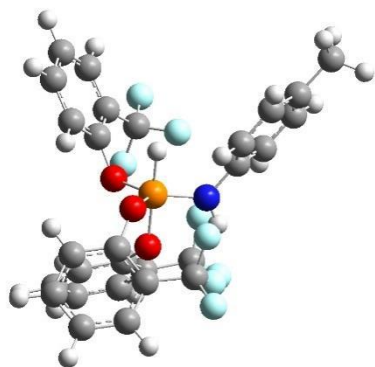

### B

|   |             |             |             |   |             |            |             |
|---|-------------|-------------|-------------|---|-------------|------------|-------------|
| P | 0.12756800  | 0.32872600  | 0.59447600  | F | 1.92100800  | 3.33783400 | 0.48919800  |
| O | 1.32333700  | 0.89714000  | 1.61472000  | F | 3.84787600  | 3.55720300 | -0.48700600 |
| O | 1.26475800  | -0.37358700 | -0.48932200 | C | 2.38672600  | 2.16938800 | -1.28635100 |
| O | -0.38387900 | -1.22767300 | 0.97459600  | C | -3.64603700 | 4.00247700 | -0.45846300 |
| C | 1.41056000  | -1.68092900 | -0.85346800 | C | -2.56833500 | 4.11241000 | 0.42570200  |
| C | 2.11750900  | -2.56487800 | -0.03512500 | C | -1.48526100 | 3.23583700 | 0.36084700  |
| C | 0.93287100  | -2.13004700 | -2.09798000 | C | -1.48255300 | 2.20410900 | -0.58030900 |
| C | 2.33515600  | -3.87909100 | -0.43517300 | C | -2.55798500 | 2.07301200 | -1.46642600 |
| H | 2.49401800  | -2.19980300 | 0.91128100  | C | -3.61738400 | 2.97181900 | -1.40915900 |
| C | 1.15750400  | -3.45352900 | -2.48928500 | H | -2.56452300 | 4.90814000 | 1.16657900  |
| C | 1.85377100  | -4.33112300 | -1.66456300 | H | -0.63175000 | 3.35782300 | 1.01876200  |
| H | 2.88545100  | -4.55200800 | 0.21650800  | H | -2.55700200 | 1.25351800 | -2.17781300 |
| H | 0.78307800  | -3.78760000 | -3.44961600 | H | -4.44752800 | 2.86187300 | -2.10296700 |
| H | 2.02089100  | -5.35588400 | -1.98054500 | C | -4.79706800 | 4.97778200 | -0.41305100 |
| C | -1.32808800 | -1.46354000 | 1.94097300  | H | -4.83431100 | 5.50744500 | 0.54413500  |
| C | -2.57886800 | -1.96733500 | 1.55768500  | H | -4.71039600 | 5.73416100 | -1.20419800 |
| C | -1.03329800 | -1.25337900 | 3.28666900  | H | -5.75756500 | 4.47022300 | -0.55657000 |
| C | -3.52033100 | -2.27822300 | 2.53866200  | N | -0.39966500 | 1.28875600 | -0.65773500 |
| C | -1.98581800 | -1.56013200 | 4.25829100  | H | -0.80372300 | 0.90459500 | 1.48316000  |
| H | -0.06213400 | -0.85066700 | 3.55411500  | H | -0.01880000 | 1.10174600 | -1.57591500 |
| C | -3.22639100 | -2.07831000 | 3.88743600  |   |             |            |             |
| H | -4.48511300 | -2.66987900 | 2.23844700  |   |             |            |             |
| H | -1.75429000 | -1.39454000 | 5.30630500  |   |             |            |             |
| H | -3.96642200 | -2.32191700 | 4.64302800  |   |             |            |             |
| C | 2.68468800  | 0.72695200  | 1.51723200  |   |             |            |             |
| C | 3.48752900  | 1.56683100  | 0.73036800  |   |             |            |             |
| C | 3.27411700  | -0.24464300 | 2.32555800  |   |             |            |             |

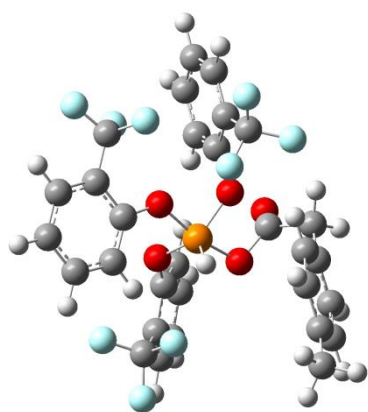

**TS<sub>A1</sub>**

|   |             |             |             |
|---|-------------|-------------|-------------|
| P | -0.24092700 | 0.02163800  | 0.01526600  |
| O | 0.79145300  | 1.25471600  | -0.51265100 |
| O | -1.50357500 | 0.80288000  | -0.69598900 |
| O | 0.83031700  | -1.07348100 | -0.69328100 |
| C | -2.77548700 | 0.27052800  | -0.88850100 |
| C | -3.01100100 | -0.55555700 | -1.98068700 |
| C | -3.81969000 | 0.63242100  | -0.02936600 |
| C | -4.30002600 | -1.02201300 | -2.22754400 |
| H | -2.17929200 | -0.86402100 | -2.59934300 |
| C | -5.10955500 | 0.16353500  | -0.29140500 |
| C | -5.35269100 | -0.66002800 | -1.38750700 |
| H | -4.47522800 | -1.67729500 | -3.07504000 |
| H | -5.91685900 | 0.44505400  | 0.37396400  |
| H | -6.35777200 | -1.02193400 | -1.57873300 |
| C | 1.67520400  | -0.88069000 | -1.78062800 |
| C | 3.05937700  | -0.83218500 | -1.59952100 |
| C | 1.11310700  | -0.82403700 | -3.05063000 |
| C | 3.87942900  | -0.71546100 | -2.72253900 |
| C | 1.94360900  | -0.70759500 | -4.16261900 |
| H | 0.03742100  | -0.88236500 | -3.15155900 |
| C | 3.32682700  | -0.65124000 | -3.99932700 |
| H | 4.95255100  | -0.66084700 | -2.58596200 |
| H | 1.50612200  | -0.65892900 | -5.15486400 |
| H | 3.97685500  | -0.55283000 | -4.86271000 |
| C | 0.78110900  | 2.56301100  | -0.12036100 |
| C | 1.73437900  | 3.40851200  | -0.71996600 |
| C | -0.09495500 | 3.08479700  | 0.83428900  |
| C | 1.79062500  | 4.75449600  | -0.35707900 |
| C | -0.02343000 | 4.43234000  | 1.18410500  |
| H | -0.84324900 | 2.46175100  | 1.29746300  |
| C | 0.91431300  | 5.27481500  | 0.59249700  |
| H | 2.52852800  | 5.39204700  | -0.82921200 |
| H | -0.72006200 | 4.81872600  | 1.92228300  |
| H | 0.96427200  | 6.32459700  | 0.86254500  |

|   |             |             |             |
|---|-------------|-------------|-------------|
| C | -3.57458500 | 1.52465200  | 1.15152700  |
| C | 2.72120800  | 2.86583800  | -1.71498600 |
| C | 3.67431100  | -0.92777500 | -0.23304700 |
| F | 3.08843500  | -0.11195900 | 0.67034900  |
| F | 3.56836300  | -2.19321900 | 0.26225700  |
| F | 4.98665400  | -0.62776700 | -0.24725400 |
| F | -4.66245800 | 1.64002700  | 1.93807600  |
| F | -3.21579100 | 2.77463600  | 0.78283200  |
| F | -2.57023900 | 1.05190400  | 1.94414200  |
| F | 2.13134300  | 2.18815100  | -2.72221600 |
| F | 3.45164900  | 3.85322800  | -2.28456400 |
| F | 3.60841700  | 2.02170700  | -1.13085700 |
| C | -0.07192700 | -2.13654400 | 4.68451400  |
| C | -1.03026400 | -2.94723200 | 4.05995700  |
| C | -0.87042900 | -3.36028200 | 2.74190800  |
| C | 0.25266400  | -2.97849900 | 1.99679900  |
| C | 1.21543700  | -2.17946500 | 2.61875300  |
| C | 1.05058900  | -1.76272300 | 3.94135900  |
| H | -1.91436400 | -3.25319700 | 4.61492000  |
| H | -1.63633300 | -3.97422800 | 2.27389800  |
| H | 2.10112900  | -1.87958900 | 2.07349900  |
| H | 1.81300700  | -1.13887000 | 4.40225300  |
| C | -0.24200600 | -1.70496400 | 6.12062200  |
| H | -1.26690400 | -1.37157200 | 6.31976500  |
| H | -0.03139100 | -2.53056100 | 6.81297000  |
| H | 0.43582700  | -0.88347600 | 6.37322000  |
| C | 0.36006900  | -3.36671400 | 0.54296800  |
| H | -0.04483800 | -4.37029100 | 0.37595400  |
| H | 1.40042700  | -3.38522000 | 0.20889300  |
| C | -0.42623700 | -2.45283400 | -0.41172900 |
| O | -0.79132700 | -2.80613900 | -1.51003600 |
| O | -1.08635500 | -1.39325300 | 0.26771900  |
| H | -0.06865800 | 0.29087000  | 1.37007300  |

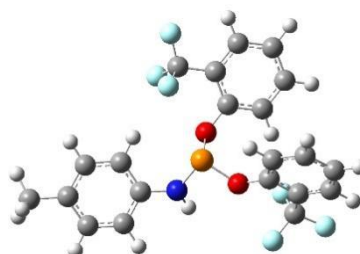

**Int 2**

|   |             |             |             |
|---|-------------|-------------|-------------|
| C | -5.61819600 | -1.74970200 | 0.16102600  |
| C | -4.95210600 | -0.53931300 | 0.35695800  |
| C | -3.57027700 | -0.43631000 | 0.22829700  |
| C | -2.81100100 | -1.57040500 | -0.06857400 |

|   |             |             |             |
|---|-------------|-------------|-------------|
| C | -3.46408400 | -2.79020800 | -0.26884700 |
| C | -4.84637700 | -2.86913800 | -0.16657700 |
| H | -5.52334200 | 0.35290500  | 0.58995000  |
| H | -3.09369800 | 0.53000300  | 0.33215700  |
| H | -2.88193300 | -3.67576100 | -0.49941200 |
| H | -5.33417600 | -3.82351500 | -0.33542000 |
| C | -7.11489400 | -1.85501000 | 0.31202000  |
| H | -7.38627600 | -2.24293600 | 1.29984400  |
| H | -7.59390200 | -0.88025900 | 0.19926700  |
| H | -7.54413900 | -2.53024200 | -0.43232300 |
| N | -1.40371600 | -1.51164100 | -0.16519000 |
| H | -0.95411000 | -2.16706200 | -0.79260100 |
| P | -0.43144200 | -0.35294700 | 0.55082500  |
| O | 0.97313400  | -1.26230100 | 0.27860800  |
| O | -0.27887900 | 0.71870800  | -0.75957600 |
| C | 2.16524800  | -1.06062000 | 0.91293000  |
| C | 2.29838900  | -0.33385100 | 2.09525100  |
| C | 3.29739600  | -1.63654400 | 0.31742800  |
| C | 3.55400900  | -0.17578400 | 2.67205500  |
| H | 1.42380900  | 0.10634200  | 2.55530400  |
| C | 4.54701800  | -1.47386300 | 0.91143100  |
| C | 4.68203500  | -0.74233500 | 2.08614100  |
| H | 3.64510200  | 0.39439900  | 3.58888000  |
| H | 5.41171400  | -1.92328100 | 0.44272700  |
| H | 5.65739100  | -0.61920100 | 2.53912300  |
| C | 0.57038700  | 1.79785800  | -0.71451000 |
| C | 1.90861700  | 1.63374800  | -1.06390900 |
| C | 0.08715500  | 3.06689100  | -0.36634600 |
| C | 2.76899200  | 2.72604000  | -1.04731200 |
| H | 2.25025100  | 0.65170800  | -1.35892600 |
| C | 0.95859400  | 4.15550400  | -0.35976000 |
| C | 2.29848400  | 3.98745100  | -0.69167900 |
| H | 3.80900800  | 2.58805200  | -1.31790200 |
| H | 0.57850700  | 5.13216800  | -0.09322300 |
| H | 2.96703100  | 4.83912200  | -0.68110400 |
| C | 3.15670500  | -2.40686400 | -0.96503400 |
| C | -1.36327400 | 3.25349300  | -0.02367700 |
| F | 2.30841100  | -3.45000800 | -0.85799000 |
| F | 4.34152500  | -2.90687900 | -1.37982700 |
| F | 2.69286800  | -1.62983200 | -1.97741500 |
| F | -2.18330400 | 2.89494600  | -1.03168400 |
| F | -1.65021400 | 4.53706400  | 0.28101000  |
| F | -1.73201300 | 2.51090600  | 1.05496100  |

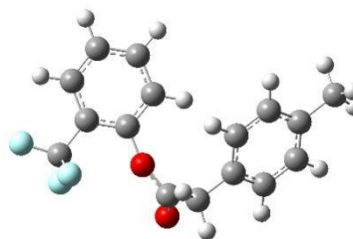

**Int 1**

|   |             |             |             |
|---|-------------|-------------|-------------|
| C | 4.51126500  | 0.62291000  | 0.06431300  |
| C | 3.49096100  | 1.00567800  | 0.94080100  |
| C | 2.40540000  | 0.17295600  | 1.18546900  |
| C | 2.31062200  | -1.07323200 | 0.56345700  |
| C | 3.32005300  | -1.45777100 | -0.31892300 |
| C | 4.40496300  | -0.62048300 | -0.56189800 |
| H | 3.54788200  | 1.96869700  | 1.43790900  |
| H | 1.62166400  | 0.49288400  | 1.86325200  |
| H | 3.25120900  | -2.41461300 | -0.82448100 |
| H | 5.18132500  | -0.93917500 | -1.24925900 |
| C | 5.69128800  | 1.52807800  | -0.18508200 |
| H | 5.36641000  | 2.52693600  | -0.48987400 |
| H | 6.29639200  | 1.64541200  | 0.71938800  |
| H | 6.33771800  | 1.13031600  | -0.96935700 |
| C | 1.11546700  | -1.97545100 | 0.80078000  |
| H | 0.62722700  | -1.71761800 | 1.74131600  |
| H | 1.42315000  | -3.02080200 | 0.83073000  |
| C | 0.12773400  | -1.82662400 | -0.33876600 |
| O | 0.09327300  | -2.51983800 | -1.34246700 |
| O | -0.72856100 | -0.81120100 | -0.29330900 |
| C | -1.23251600 | 0.47604800  | -0.31660800 |
| C | -2.59145500 | 0.68940400  | -0.05714000 |
| C | -0.38234100 | 1.54933100  | -0.55295100 |
| C | -3.08443700 | 1.99329500  | -0.03383600 |
| C | 0.88985600  | 2.84449400  | -0.53906500 |
| H | 0.66064800  | 1.35384400  | -0.75283100 |
| C | -2.23829600 | 3.06989100  | -0.27800700 |
| H | -4.13414000 | 2.15545700  | 0.16861800  |
| H | -0.22381800 | 3.67588200  | -0.73545500 |
| H | -2.63260800 | 4.07817400  | -0.26419200 |
| C | -3.50432200 | -0.47223400 | 0.20832500  |
| F | -3.47633000 | -1.38766000 | -0.78948800 |
| F | -3.17525300 | -1.13093700 | 1.34715800  |
| F | -4.78929800 | -0.08638300 | 0.34513500  |

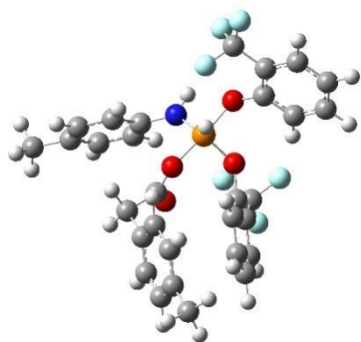

**C**

|   |             |             |             |
|---|-------------|-------------|-------------|
| C | 1.50463800  | 5.23021300  | 0.20023200  |
| C | 0.98685500  | 4.69304000  | -0.98122500 |
| C | 0.09299300  | 3.62734900  | -0.95412200 |
| C | -0.27927800 | 3.06256600  | 0.26292400  |
| C | 0.23376600  | 3.58124800  | 1.44991500  |
| C | 1.10819300  | 4.65967700  | 1.41404800  |
| H | 1.27872600  | 5.11944000  | -1.93498100 |
| H | -0.31221800 | 3.21922200  | -1.87159700 |
| H | -0.02474300 | 3.10563400  | 2.38739000  |
| H | 1.50943800  | 5.04927200  | 2.34327700  |
| C | 2.44614200  | 6.40736400  | 0.17171000  |
| H | 3.19882200  | 6.33248300  | 0.95990100  |
| H | 2.96316700  | 6.48054500  | -0.78716900 |
| H | 1.90337000  | 7.34593100  | 0.32621700  |
| N | -1.19834400 | 1.97200300  | 0.30429500  |
| H | -2.08381200 | 2.14729000  | 0.75854000  |
| P | -1.03528100 | 0.39191800  | -0.15811100 |
| O | -0.65443900 | -0.82874100 | 0.86878700  |
| O | -2.69466400 | 0.21084400  | 0.31326900  |
| C | 0.49921200  | -1.55117500 | 1.05543500  |
| C | 1.13590900  | -2.19865800 | 0.00679000  |
| C | 0.95961900  | -1.68744100 | 2.36754200  |
| C | 2.27287500  | -2.95794500 | 0.26201600  |
| H | 0.76264000  | -2.08286600 | -1.00058000 |
| C | 2.09483600  | -2.45515600 | 2.61036800  |
| C | 2.75737800  | -3.08284800 | 1.55965200  |
| H | 2.78388400  | -3.43557200 | -0.56284000 |
| H | 2.45565200  | -2.55361200 | 3.62481500  |
| H | 3.64699400  | -3.66797600 | 1.75598900  |
| C | -3.41945600 | -0.90669000 | 0.03712500  |
| C | -3.31522400 | -2.04963800 | 0.83186200  |
| C | -4.33096700 | -0.88533800 | -1.03156600 |
| C | -4.10123100 | -3.16188100 | 0.55312600  |
| H | -2.62334400 | -2.03891200 | 1.66150800  |
| C | -5.11752200 | -2.00628400 | -1.29676500 |

|   |             |             |             |
|---|-------------|-------------|-------------|
| C | -4.99920900 | -3.14734400 | -0.51219200 |
| H | -4.01423900 | -4.04351600 | 1.17744100  |
| H | -5.82109300 | -1.97536000 | -2.11743600 |
| H | -5.61174700 | -4.01461200 | -0.72512900 |
| C | 0.21038300  | -1.04168400 | 3.49976600  |
| C | -4.48722500 | 0.36058100  | -1.85589700 |
| F | 0.03692700  | 0.28403600  | 3.34697200  |
| F | 0.84444900  | -1.22029400 | 4.68053400  |
| F | -1.02891700 | -1.58155200 | 3.64517300  |
| F | -4.86099700 | 1.42740800  | -1.12115800 |
| F | -5.41468800 | 0.21039200  | -2.82739700 |
| F | -3.33279300 | 0.71331200  | -2.48755500 |
| C | 4.51301100  | -2.47644000 | -2.56057400 |
| C | 3.38677100  | -1.90259600 | -3.15957500 |
| C | 2.86129600  | -0.70115100 | -2.69730100 |
| C | 3.44427300  | -0.03680400 | -1.61612800 |
| C | 4.55856700  | -0.61223700 | -1.00643300 |
| C | 5.08685300  | -1.81112400 | -1.47493700 |
| H | 2.91899400  | -2.40158900 | -4.00214500 |
| H | 1.98410700  | -0.27571600 | -3.17128600 |
| H | 5.01041600  | -0.12162600 | -0.15162000 |
| H | 5.95534500  | -2.23922200 | -0.98533800 |
| C | 5.10323100  | -3.75967600 | -3.08881600 |
| H | 4.32916500  | -4.42108200 | -3.48506600 |
| H | 5.80962700  | -3.56078200 | -3.90168800 |
| H | 5.64569800  | -4.29892300 | -2.30920800 |
| C | 2.85549700  | 1.25092900  | -1.08337400 |
| H | 2.46761000  | 1.86236500  | -1.89915100 |
| H | 3.60737400  | 1.82084800  | -0.53887400 |
| C | 1.72331500  | 0.96505800  | -0.11364000 |
| O | 1.82770200  | 1.00102100  | 1.08338900  |
| O | 0.59392200  | 0.62960100  | -0.77745800 |
| H | -1.31120500 | -0.07147000 | -1.44216900 |

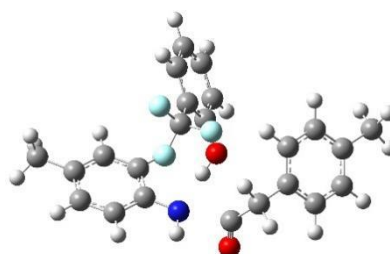

**TSA2**

|   |            |             |             |
|---|------------|-------------|-------------|
| C | 5.17426500 | 0.16680300  | -0.81285900 |
| C | 4.14385300 | 0.88060300  | -0.18511100 |
| C | 3.13018500 | 0.22748600  | 0.50620200  |
| C | 3.12854200 | -1.16865500 | 0.59492300  |



|   |             |             |             |   |             |             |             |
|---|-------------|-------------|-------------|---|-------------|-------------|-------------|
| C | -2.71457900 | -1.53372100 | -3.39441700 | C | 3.90244700  | -1.28678500 | 0.00057400  |
| H | -2.90432200 | -0.62489100 | -1.44404300 | C | 3.50575600  | -0.68450800 | -1.19668300 |
| C | -0.50110900 | -1.51104200 | -4.34034500 | C | 2.74273500  | 0.47857400  | -1.19694700 |
| C | -1.84908600 | -1.83983600 | -4.44020300 | C | 2.34896500  | 1.08059400  | 0.00210900  |
| H | -3.76629800 | -1.78335100 | -3.46566000 | C | 2.74217100  | 0.47665300  | 1.20037500  |
| H | 0.18193700  | -1.74568600 | -5.14505200 | C | 3.50520800  | -0.68641200 | 1.19860500  |
| H | -2.21885400 | -2.33074400 | -5.33149200 | H | 3.79889000  | -1.13133500 | -2.14086900 |
| C | -4.33886800 | 0.00218600  | 1.33310800  | H | 2.44266700  | 0.92455500  | -2.13938100 |
| C | 1.44753700  | -0.55261000 | -3.07592900 | H | 2.44165500  | 0.92112300  | 2.14337900  |
| F | -3.93565400 | 0.77445600  | 2.36340000  | H | 3.79790100  | -1.13475100 | 2.14221200  |
| F | -5.68480500 | 0.08732300  | 1.28050600  | C | 4.75895000  | -2.52736800 | -0.00021200 |
| F | -3.87132400 | 0.58993100  | 0.20214000  | H | 4.57251400  | -3.13919100 | -0.88539900 |
| F | 1.67201000  | 0.77307200  | -2.91738100 | H | 5.82265000  | -2.26673300 | 0.00032800  |
| F | 2.14830200  | -0.93841600 | -4.15991900 | H | 4.57198000  | -3.14067900 | 0.88383300  |
| F | 2.00773200  | -1.16894600 | -2.00638800 | C | 1.46446100  | 2.29872000  | 0.00287900  |
| C | 6.65177800  | -0.99206800 | 1.32588500  | H | 1.66103000  | 2.92521200  | -0.87078200 |
| C | 5.92970500  | -1.17286500 | 0.14654600  | H | 1.66007100  | 2.92344300  | 0.87800700  |
| C | 4.68407200  | -0.57496300 | -0.03372700 | C | -0.05639400 | 2.05764900  | 0.00177000  |
| C | 4.12973500  | 0.22583500  | 0.96270200  | O | -0.82398300 | 3.00192000  | 0.00304700  |
| C | 4.84426500  | 0.40355500  | 2.15140500  | N | -0.43068800 | 0.74204400  | -0.00075700 |
| C | 6.08390000  | -0.19609300 | 2.32734600  | H | 0.32527900  | 0.07255700  | -0.00130700 |
| H | 6.34281500  | -1.79263000 | -0.64261100 | C | -1.72721500 | 0.19200500  | -0.00220300 |
| H | 4.13631200  | -0.74025300 | -0.95298500 | C | -2.89384600 | 0.96337200  | -0.00458900 |
| H | 4.40949100  | 0.99723900  | 2.94638300  | C | -1.83353900 | -1.20392900 | -0.00667500 |
| H | 6.62105300  | -0.04768600 | 3.25876600  | C | -4.13191200 | 0.32839300  | -0.00899600 |
| C | 8.00999500  | -1.61890600 | 1.51751300  | H | -2.81676700 | 2.03897900  | -0.00657500 |
| H | 8.20183200  | -2.38783100 | 0.76649000  | C | -3.07864200 | -1.81612800 | -0.01110900 |
| H | 8.80493300  | -0.86997700 | 1.43631200  | H | -0.93262700 | -1.80970100 | -0.01106500 |
| H | 8.09865700  | -2.08012600 | 2.50483200  | C | -4.25554800 | -1.06213200 | -0.00971600 |
| C | 2.77827200  | 0.87808400  | 0.77160900  | H | -5.02808800 | 0.94020600  | -0.01404800 |
| H | 2.46243400  | 0.78850600  | -0.26431200 | H | -3.13574700 | -2.89958600 | -0.01776500 |
| H | 2.82563700  | 1.93993200  | 1.02550800  | C | -5.60768700 | -1.72881100 | 0.01878100  |
| C | 1.74693500  | 0.26181600  | 1.69764200  | H | -5.59423200 | -2.68007900 | -0.51859000 |
| O | 1.79050400  | 0.26210000  | 2.89659400  | H | -5.92376400 | -1.93825300 | 1.04662300  |
| O | 1.14836000  | -1.00014300 | 1.03973700  | H | -6.37218900 | -1.09476200 | -0.43545700 |
| H | -0.53109700 | -1.89006300 | -0.06554300 |   |             |             |             |

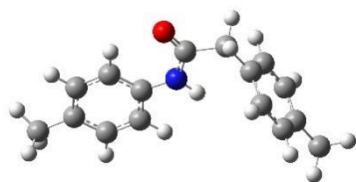

**P30**



## REFERENCES:

- [1] R. Zhang, W.-Z. Yao, L. Qian, W. Sang, Y. Yuan, M.-C. Du, H. Cheng, C. Chen, X. Qin, A practical and sustainable protocol for direct amidation of unactivated esters under transition-metal-free and solvent-free conditions. *Green Chemistry*. **2021**, *23*, 3972-3982.
- [2] D. Saha, Surabhia, P. Gupta, J. Shabira, M. Dhamaa, S. Mozumdar, Diamine-functionalized porous graphene oxide sheet decorated with palladium oxide nanoparticles for the oxidative amidation of aldehydes. *New J. Chem.* **2022**, *46*, 20828-20843.
- [3] T. Fan, A. Wang, J.-Q. Li, J.-L. Ye, X. Zheng, P.-Q. Huang, Versatile One-Pot Synthesis of Polysubstituted Cyclopent-2-enimines from  $\alpha$ ,  $\beta$ -Unsaturated Amides: Imino-Nazarov Reaction. *Angew. Chem. Int. Ed.* **2018**, *57*, 10352-10356.
- [4] F. Wang, Y. Tong, G. Zou, Nickel-Catalyzed, Manganese-Assisted denitrogenative cross-electrophile-coupling of benzotriazinones with alkyl halides for ortho-alkylated benzamides. *Org. Lett.* **2022**, *24*, 5741-5745.
- [5] L. Zhang, Q. Chen, L. Li, N. Ma, J. Tian, H. Sun, Q. Xu, Y. Yang, C. Li, Synthesis of N-Unsubstituted and N3-substituted quinazoline-2, 4 (1H, 3H)-diones from o-aminobenzamides and CO<sub>2</sub> at atmospheric pressure and room temperature. *Org. Lett.* **2023**, *25*, 2471-2475.
- [6] Q. Teng, G. Sun, F. Huang, K. Wang, F. Liang, Visible-light induced Cerium-catalyzed N-demethylation of N-methyl amides under air conditions. *Adv. Synth. Catal.* **2023**, *365*, 307-311.
- [7] T. Lundrigan, J. P. Tassone, M. Stradiotto, Nickel-Catalyzed N-Arylation of Amides with (Hetero)aryl Electrophiles using a DBU/NaTFA Dual-Base System. *Synlett*. **2021**, *32*, 1665-1669.
- [8] J. Su, J.-N. Mo, X. Chen, A. Umanzor, Z. Zhang, K. N. Houk, J. Zhao, Generation of oxyphosphonium ions by photoredox/cobaloxime catalysis for scalable amide and peptide synthesis in batch and continuous-flow. *Angew. Chem. Int. Ed.* **2022**, *61*, e202116873.
- [9] D. Han, J. Sun, J. Jin, Picolinamide ligands: Nickel-catalyzed reductive cross-coupling of aryl bromides with bromocyclopropane and beyond. *Chem. Asian. J.* **2023**, *18*, e202201132.
- [10] W. I. Nicholson, F. Barreteau, J. A. Leitch, R. Payne, I. Priestley, E. Godineau, C. Battilocchio, D. L. Browne, Direct Amidation of Esters via Ball Milling. *Angew. Chem. Int. Ed.* **2021**, *60*, 21868-21874.
- [11] D. Marcos-Atanes, C. Vidal, C. D. Navo, F. Peccati, G. Jiménez-Osés, J. L. Mascareñas, Iridium-Catalyzed ortho-Selective Borylation of Aromatic Amides Enabled by 5-Trifluoromethylated Bipyridine Ligands. *Angew. Chem. Int. Ed.* **2023**, *62*, e202214510.
- [12] L.-M. Yang, S.-S. Li, Y.-Y. Zhang, J.-L. Lu, J.-T. Deng, A.-J. Ma, X.-Z. Zhang, S.-Y. Zhang, J.-B. Peng, Palladium catalyzed aminocarbonylation of benzylic ammonium triflates with nitroarenes: Synthesis of phenylacetamides. *Adv. Synth. Catal.* **2021**, *363*, 2061-2065.
- [13] N. Vasudevan, G. R. Jachak, D. S. Reddy, Breaking and making of rings: A method for the preparation of 4-quinolone-3-carboxylic acid amides and the expensive drug ivacaftor. *Eur. J. Org. Chem.* **2015**, *2015*, 7433-7437.
- [14] S. N. C. Sridhar, S. Palawat, A. T. Paul. Design, synthesis, biological evaluation and molecular modelling studies of indole glyoxylamides as a new class of potential pancreatic lipase inhibitors. *Bioorg. Chem.* **2019**, *85*, 373-381.
- [15] M. J. Thompson, V. Borsenberger, J. C. Louth, K. E. Judd, B. Chen, Design, synthesis, and structure-activity relationship of indole-3-glyoxylamide libraries possessing highly potent activity in a cell line model of prion disease. *J. Med. Chem.* **2009**, *52*, 7503-7511.
- [16] J. Kang, L. Chen, H. Cui, L. Zhang, C.-Y. Su. N-H Insertion reactions catalyzed by a dirhodium

- metal-organic cage: A facile and recyclable approach for C-N bond formation. *Chinese J. Chem.* **2017**, *35*, 964-968.
- [17] T. Alam, A. Rakshit, H. N. Dhara, A. Palai, B. K. Patel, Electrochemical amidation: benzoyl hydrazine/carbazate and amine as coupling partners. *Org. Lett.* **2022**, *24*, 6619-6624.
- [18] N. Benamara, M. Merabet-Khelassi, L. Aribi-Zouiouche, O. Riant. CAL-B-mediated efficient synthesis of a set of valuable amides by direct amidation of phenoxy- and aryl-propionic acids. *Chem. Pap.* **2021**, *75*, 4045-4053.
- [19] D. Podder, S. R. Chowdhury, S. K. Nandi, D. Haldar, Tripeptide based super-organogelators: Structure and function. *New J. Chem.* **2019**, *43*, 3743-3749.
- [20] S. Pal, E. N. Prabhakaran, Trimodular solution-phase protocol for rapid large-scale synthesis of hydrogen bond surrogate-constrained  $\alpha$ -helicomimics. *Eur. J. Org. Chem.* **2021**, *2021*, 1714-1719.
- [21] M. J. Frisch, G. W. T., H. B. Schlegel, G. E. Scuseria, M. A. Robb, J. R. Cheeseman, G. Scalmani, V. Barone, G. A. Petersson, H. Nakatsuji, X. Li, M. Caricato, A. Marenich, J. Bloino, B. G. Janesko, R. Gomperts, B. Mennucci, H. P. Hratchian, J. V. Ortiz, A. F. Izmaylov, J. L. Sonnenberg, D. Williams-Young, F. Ding, F. Lipparini, F. Egidi, J. Goings, B. Peng, A. Petrone, T. Henderson, D. Ranasinghe, V. G. Zakrzewski, J. Gao, N. Rega, G. Zheng, W. Liang, M. Hada, M. Ehara, K. Toyota, R. Fukuda, J. Hasegawa, M. Ishida, T. Nakajima, Y. Honda, O. Kitao, H. Nakai, T. Vreven, K. Throssell, J. A. Montgomery, Jr., J. E. Peralta, F. Ogliaro, M. Bearpark, J. J. Heyd, E. Brothers, K. N. Kudin, V. N. Staroverov, T. Keith, R. Kobayashi, J. Normand, K. Raghavachari, A. Rendell, J. C. Burant, S. S. Iyengar, J. Tomasi, M. Cossi, J. M. Millam, M. Klene, C. Adamo, R. Cammi, J. W. Ochterski, R. L. Martin, K. Morokuma, O. Farkas, J. B. Foresman, and D. J. Fox, Gaussian, Inc., Wallingford CT 2016.
- [22] A. D. Becke, Density-functional thermochemistry. III. The role of exact exchange. *J. Chem. Phys.* **1993**, *98*, 5648-5652.
- [23] C. Lee, W. Y, R. G. Parr, Development of the Colle-Salvetti correlation-energy into a function of the electron density. *Phys. Rev. B* **1988**, *37*, 785-789.
- [24] S. Grimme, J. Antony, S. Ehrlich, H. Krieg, A consistent and accurate ab initio parametrization of density functional dispersion correction (DFT-D) for the 94 elements H-Pu. *J. Chem. Phys.* **2010**, *132*, 154104.
- [25] S. Grimme, S. Ehrlich, L. Goerigk, Effect of the damping function in dispersion corrected density functional theory. *J. Comput. Chem.* **2011**, *32*, 1456-1465.

## 5. Copies of NMR Spectra

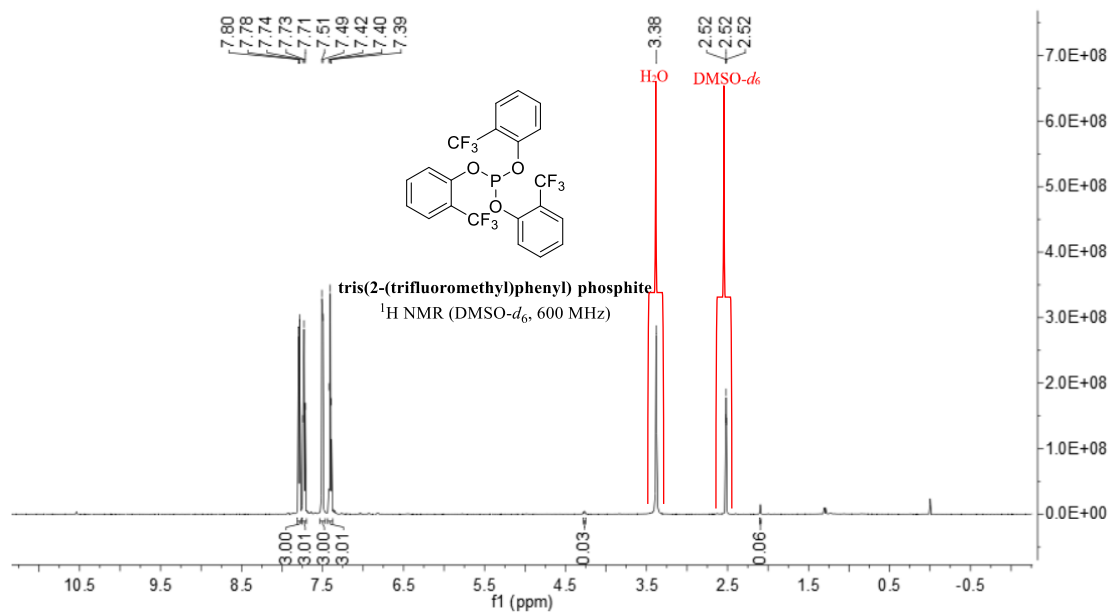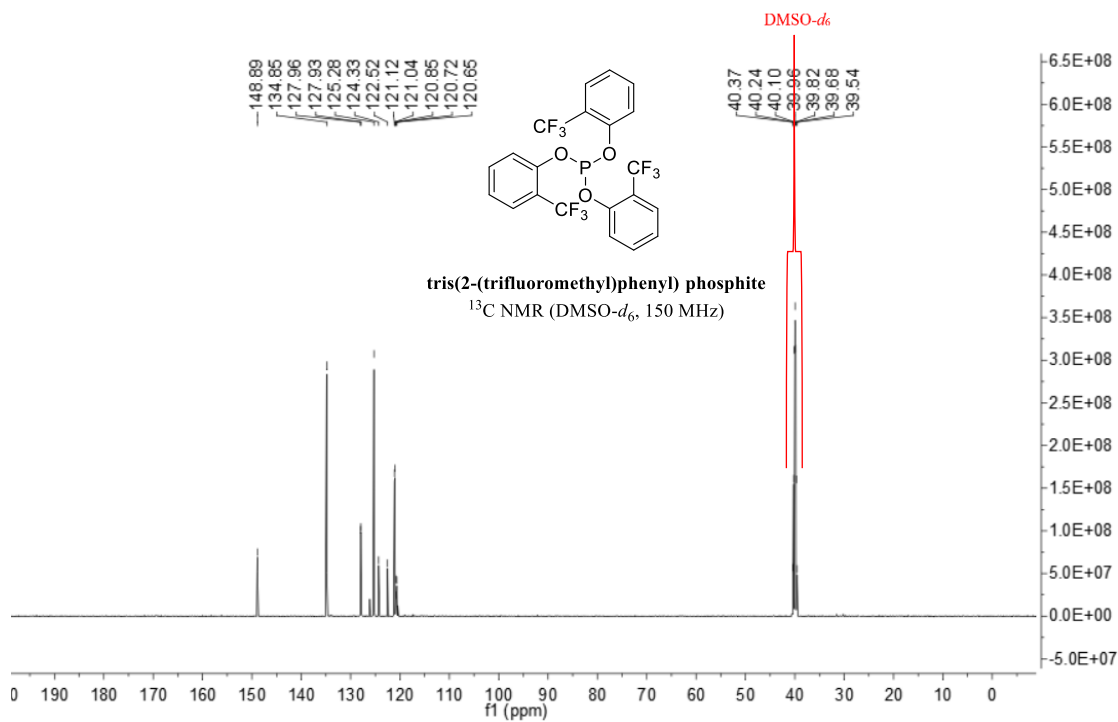

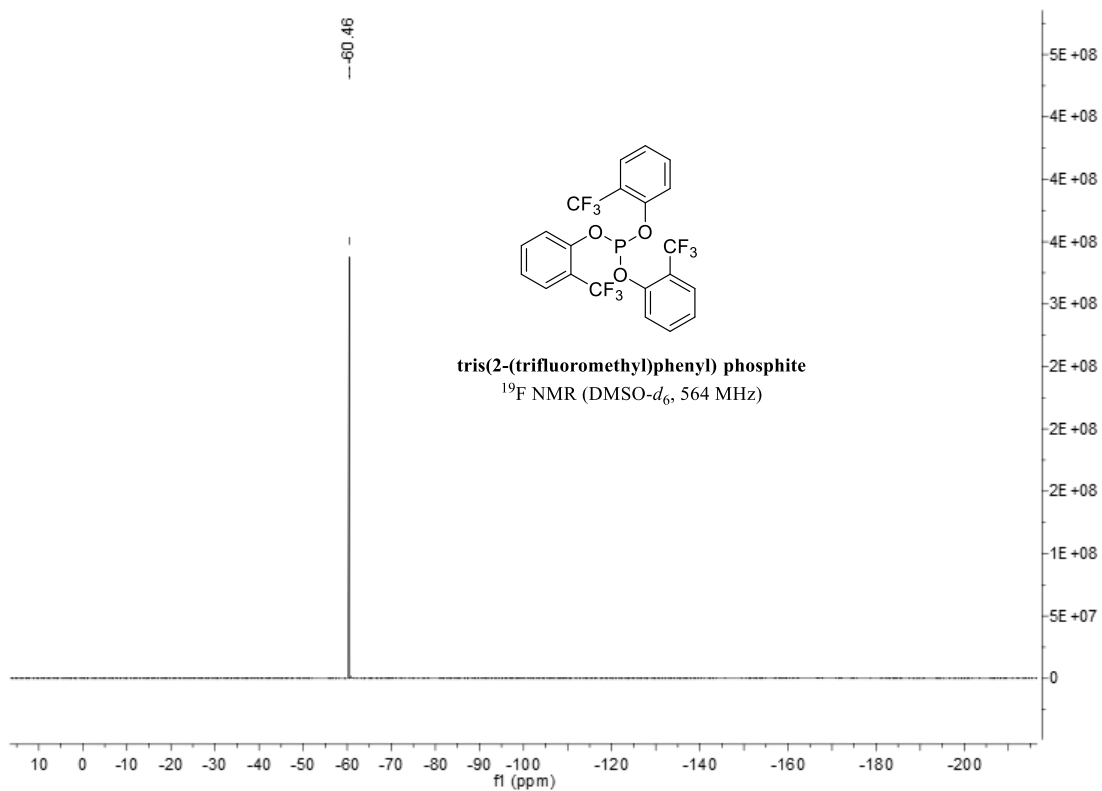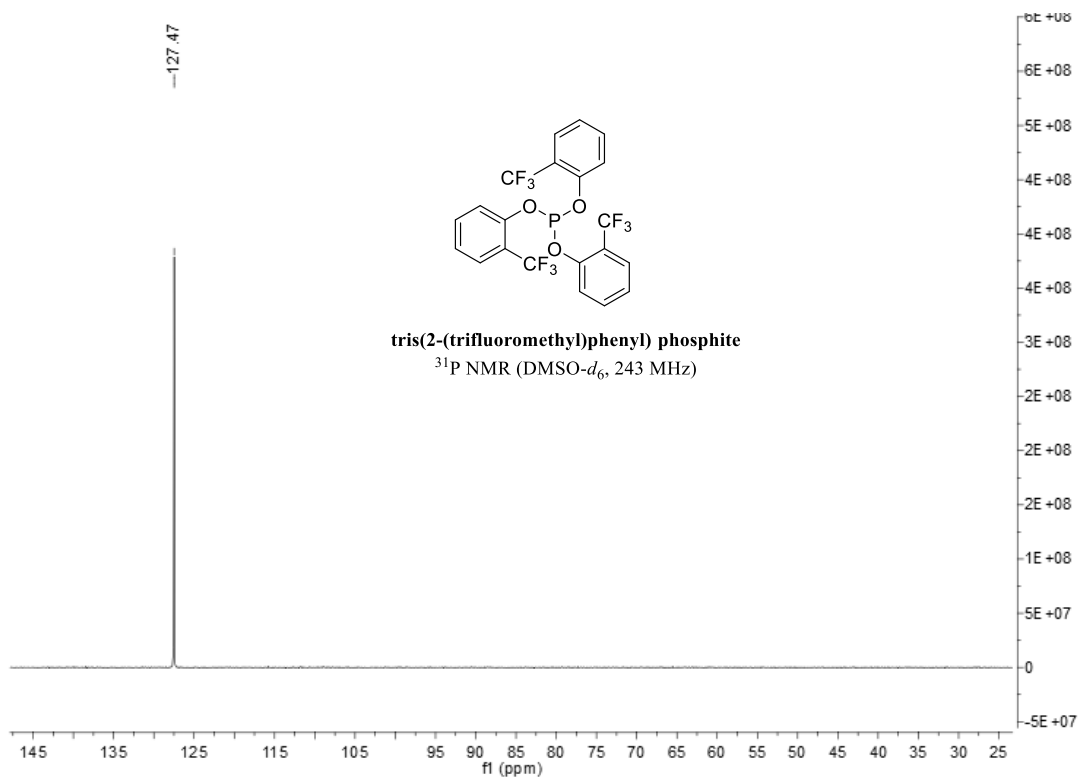

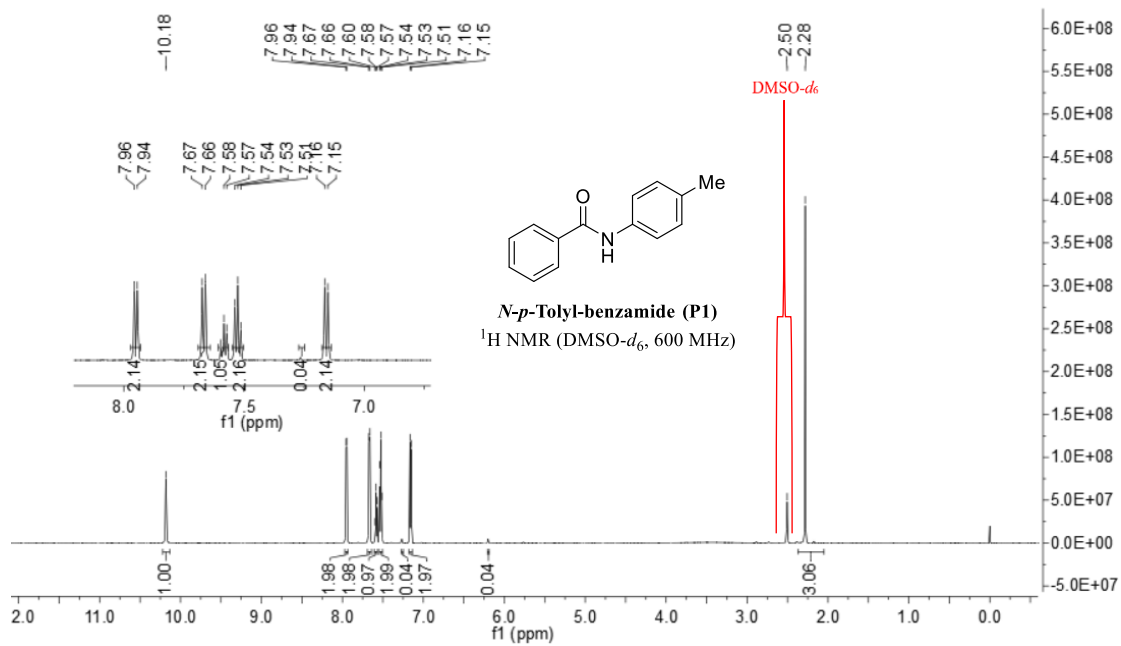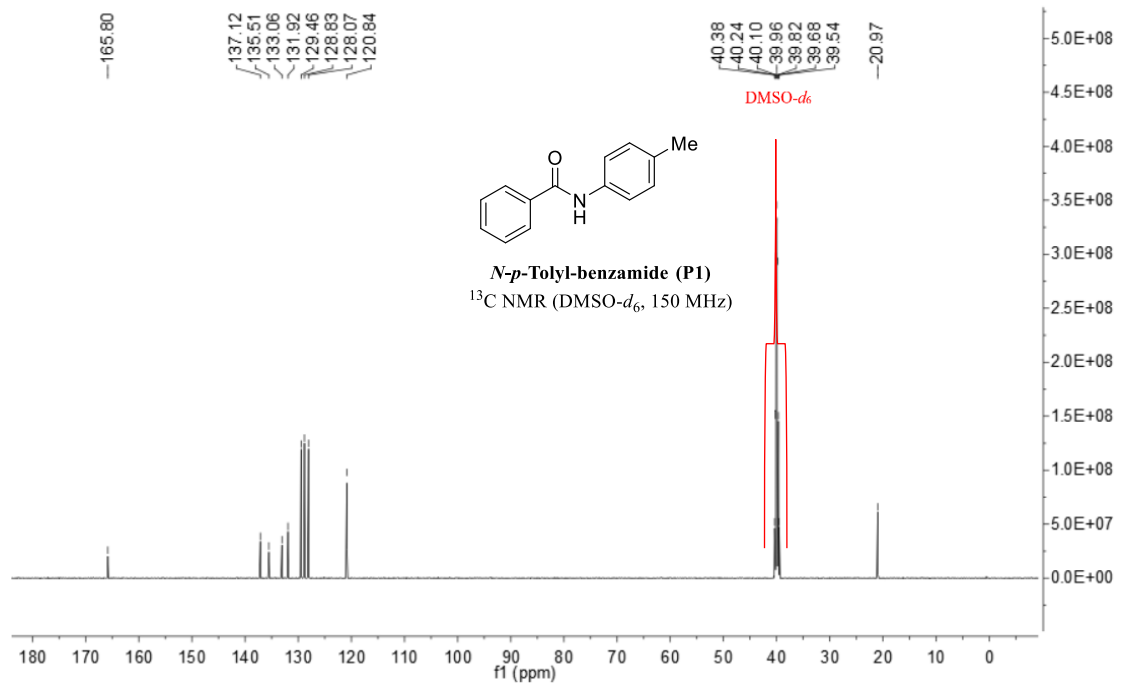

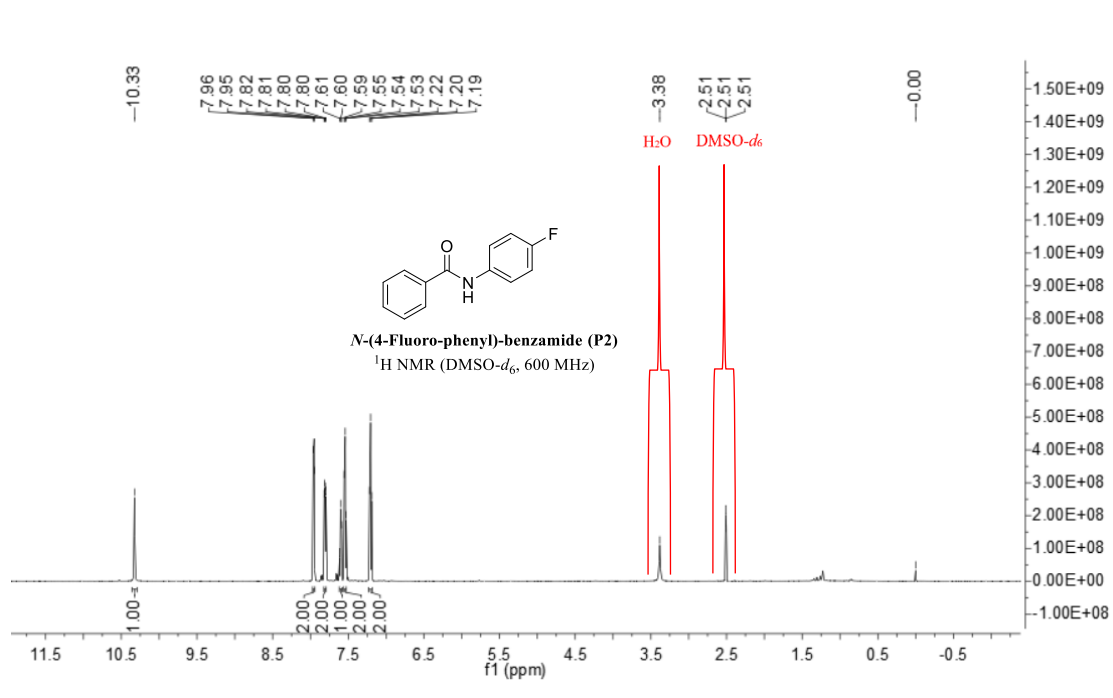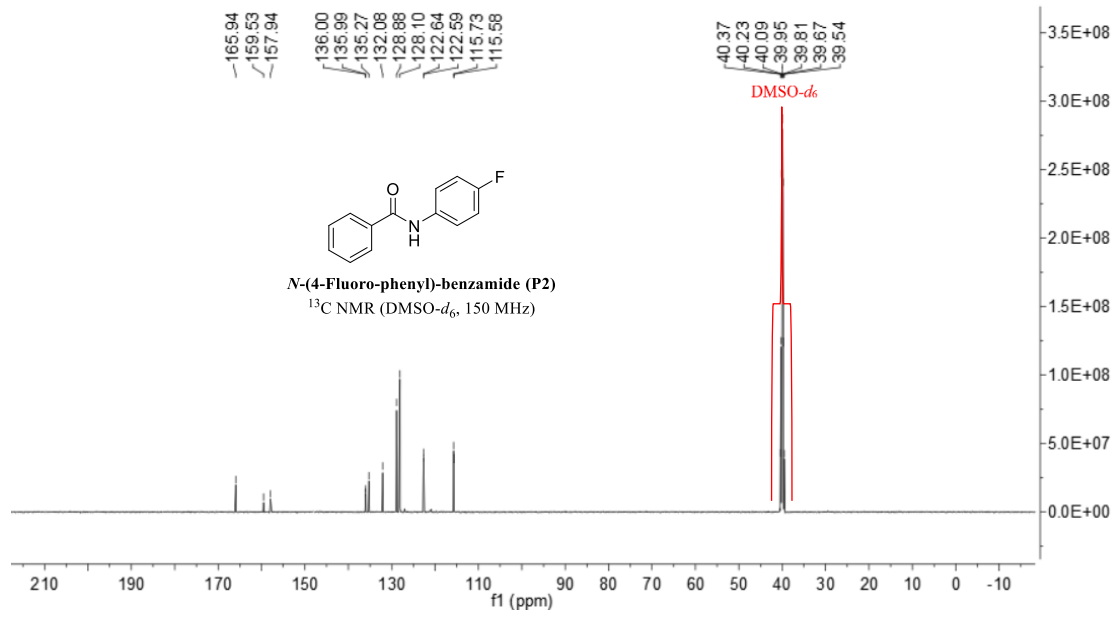

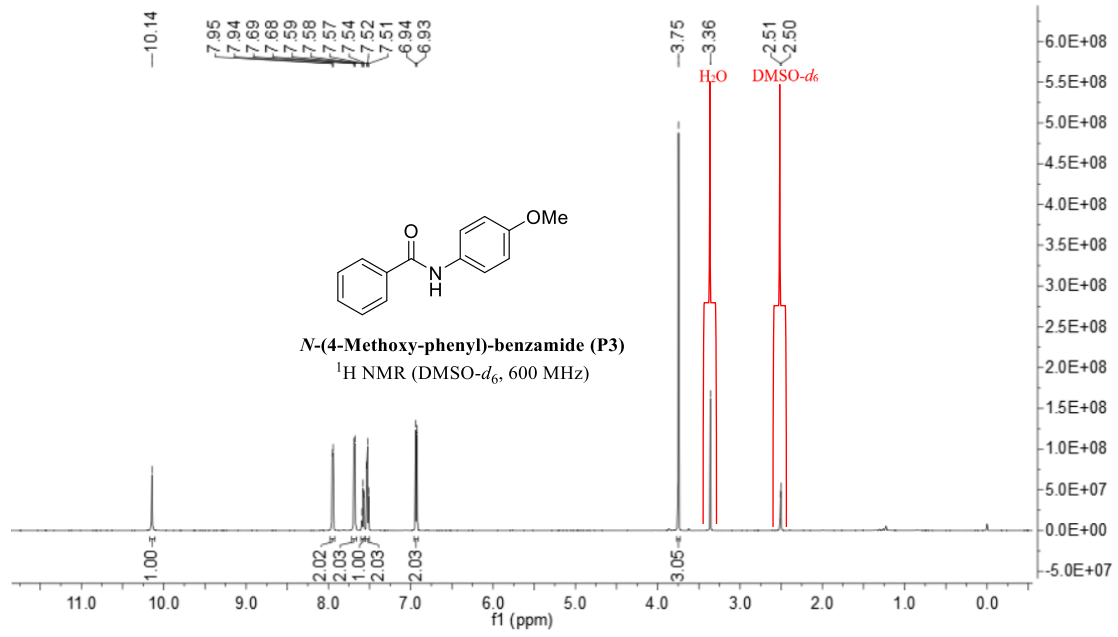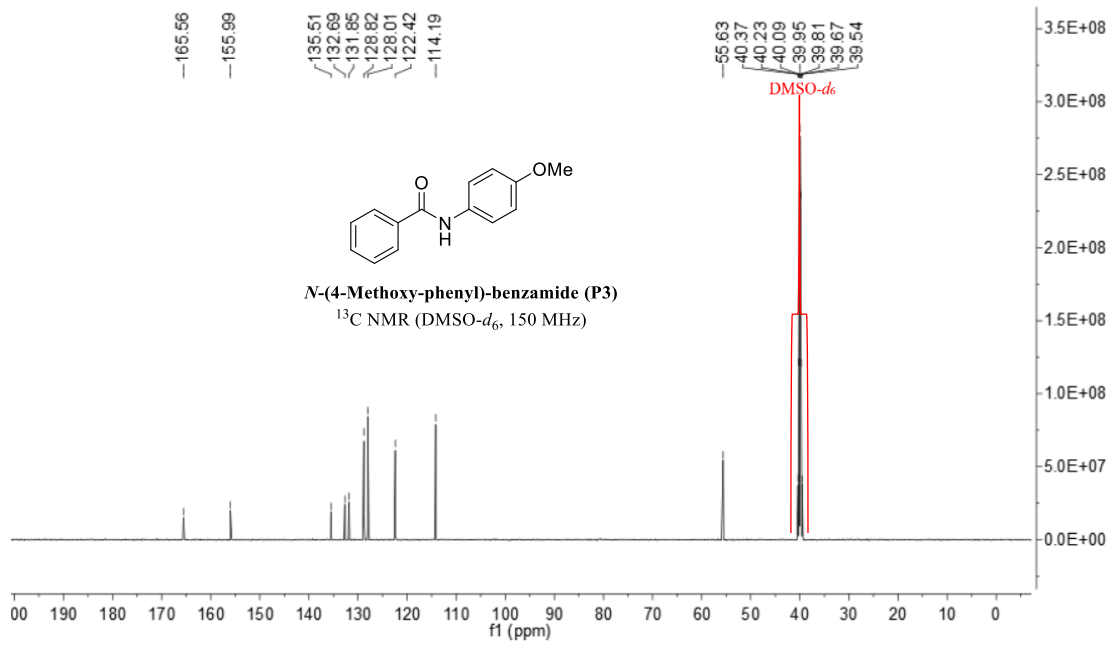

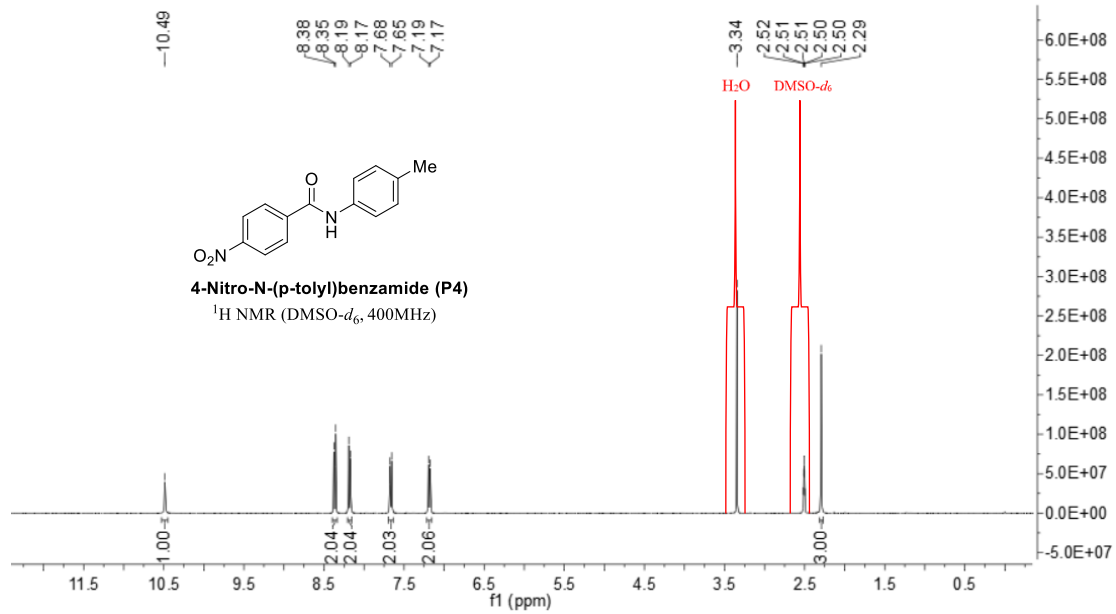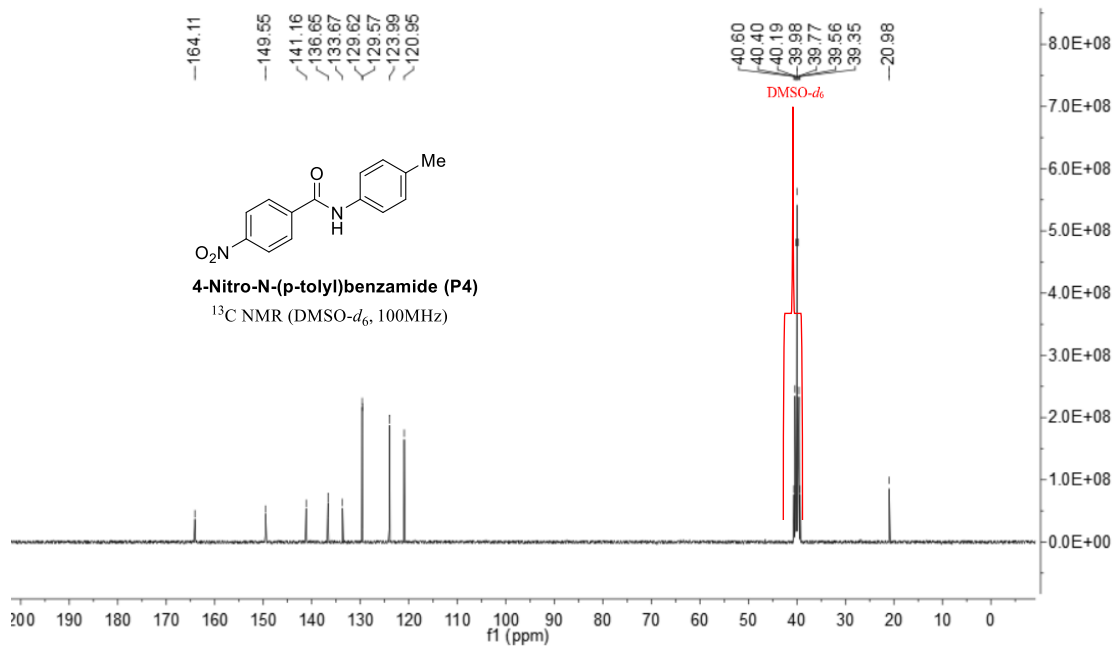



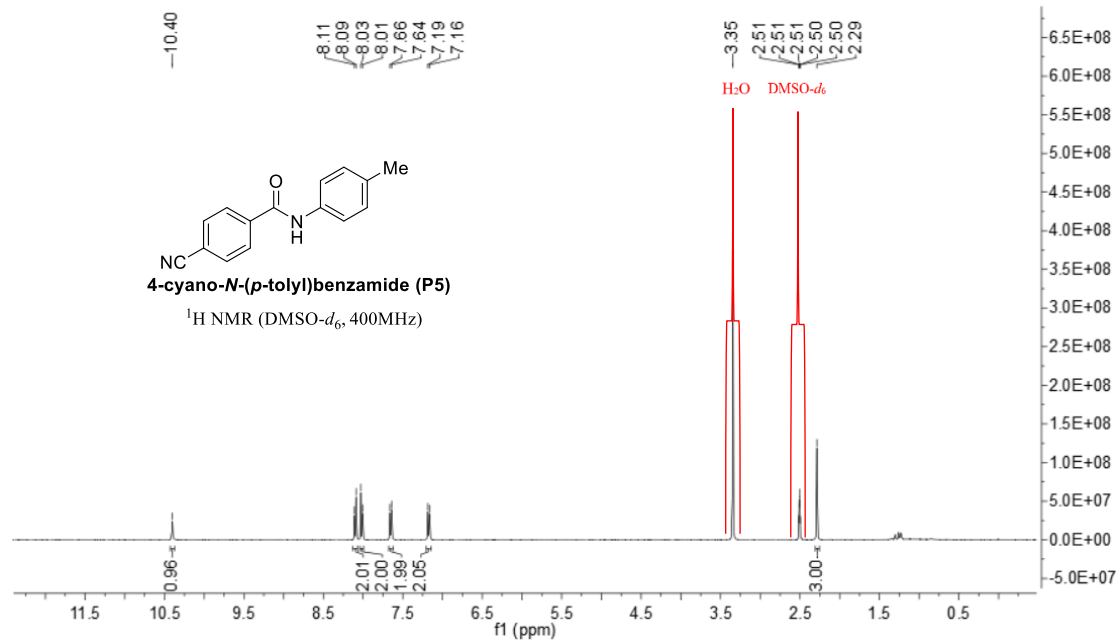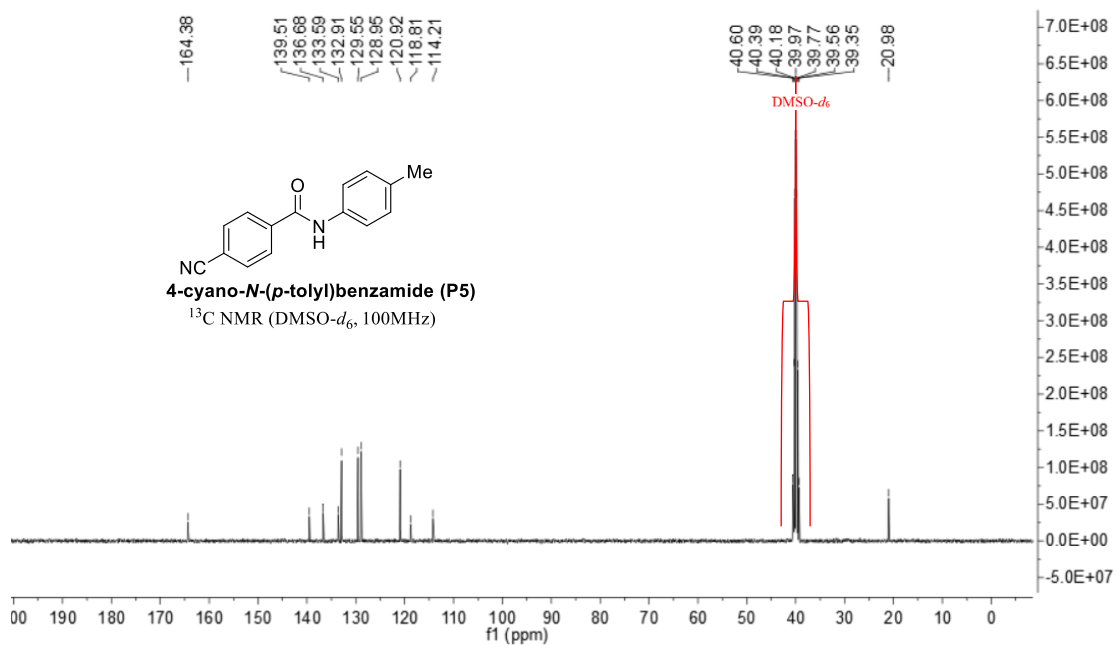

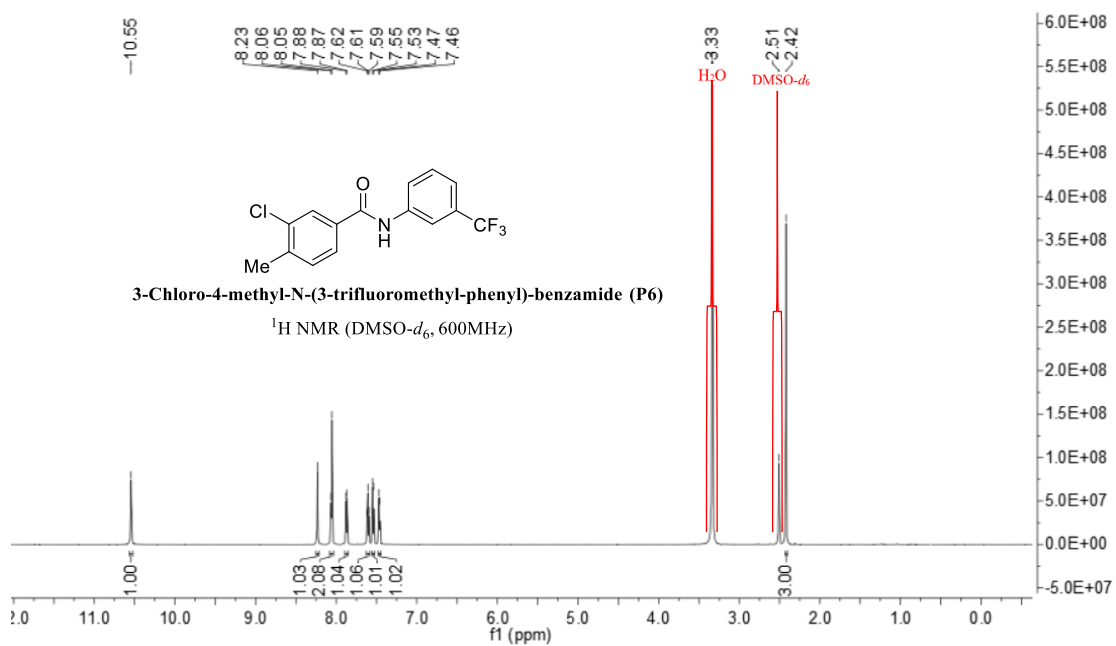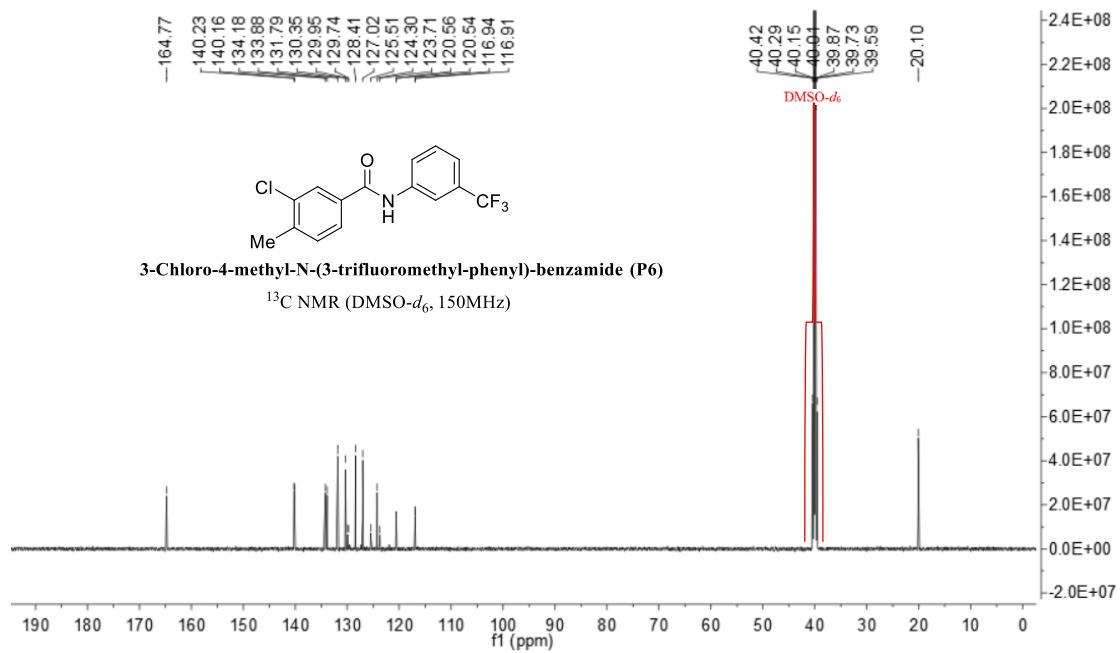

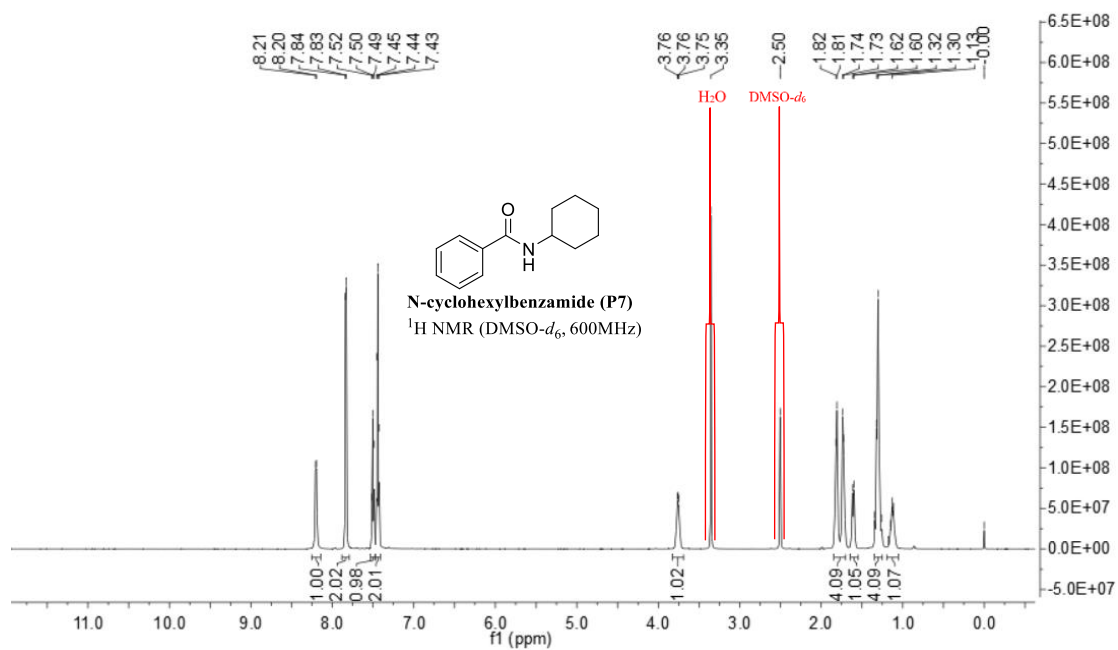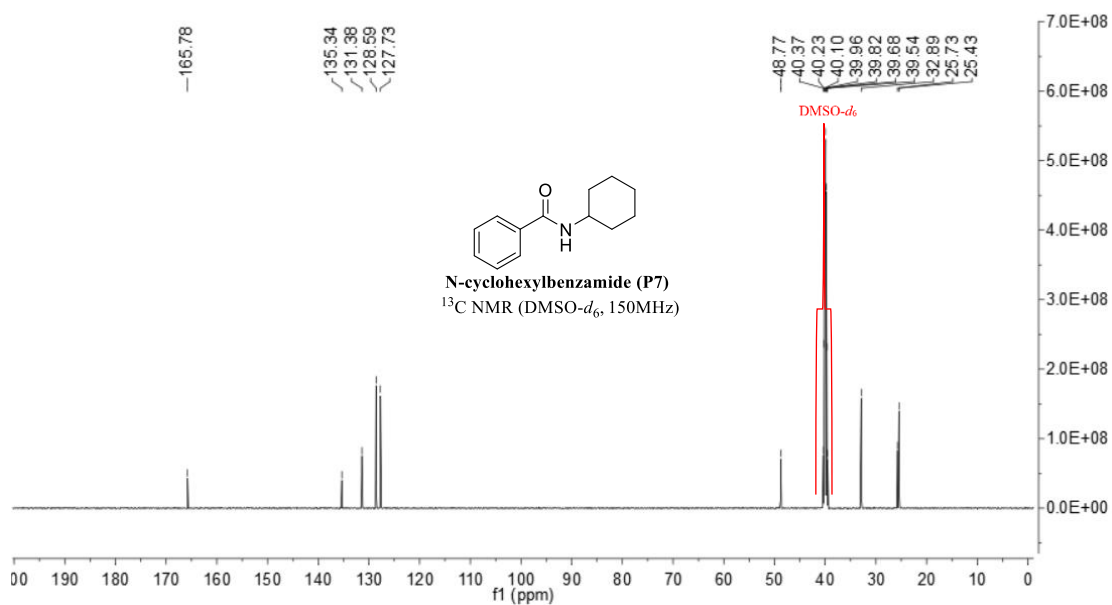

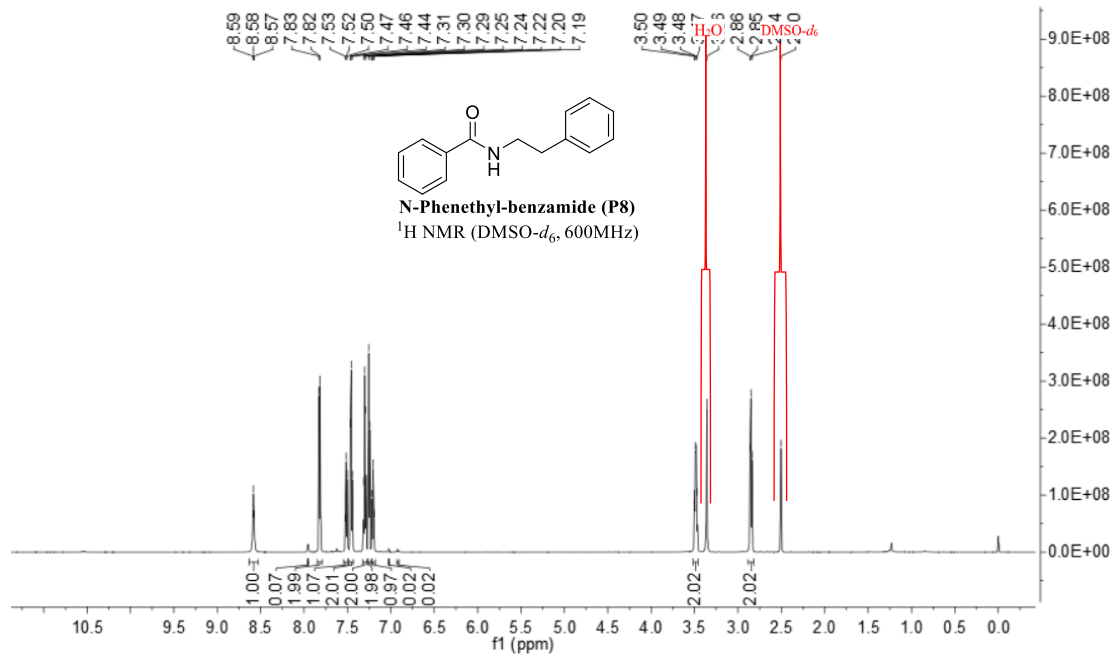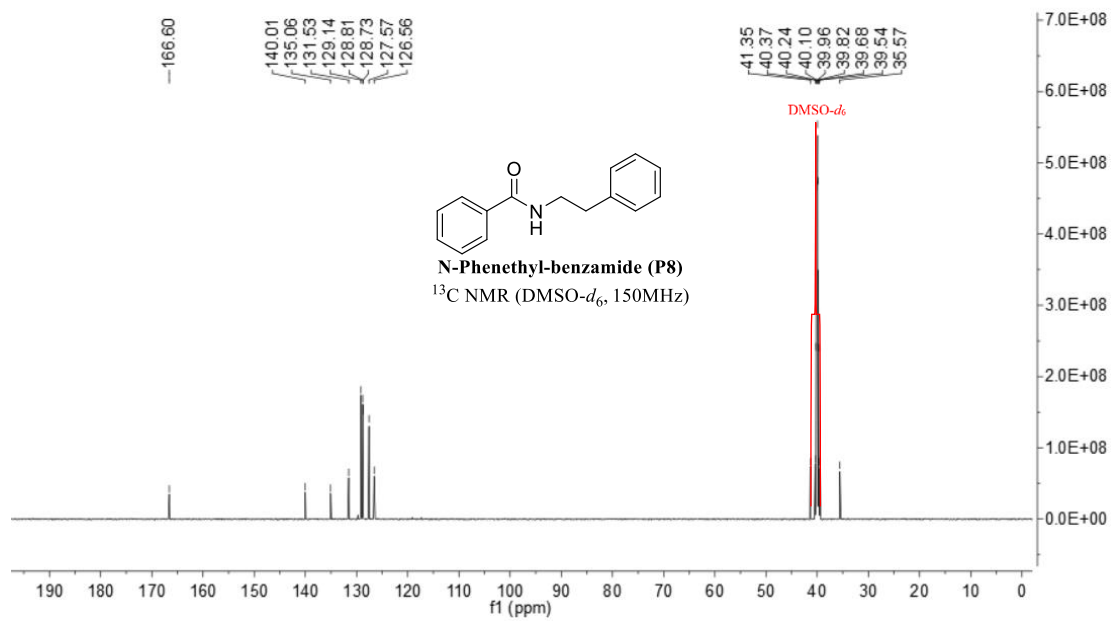

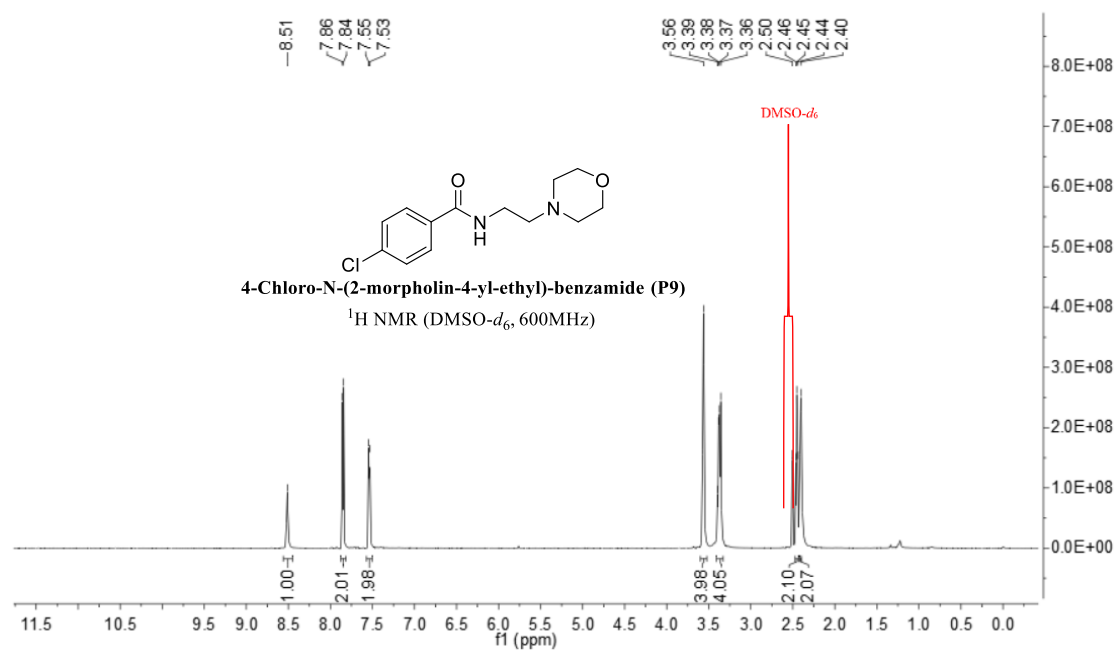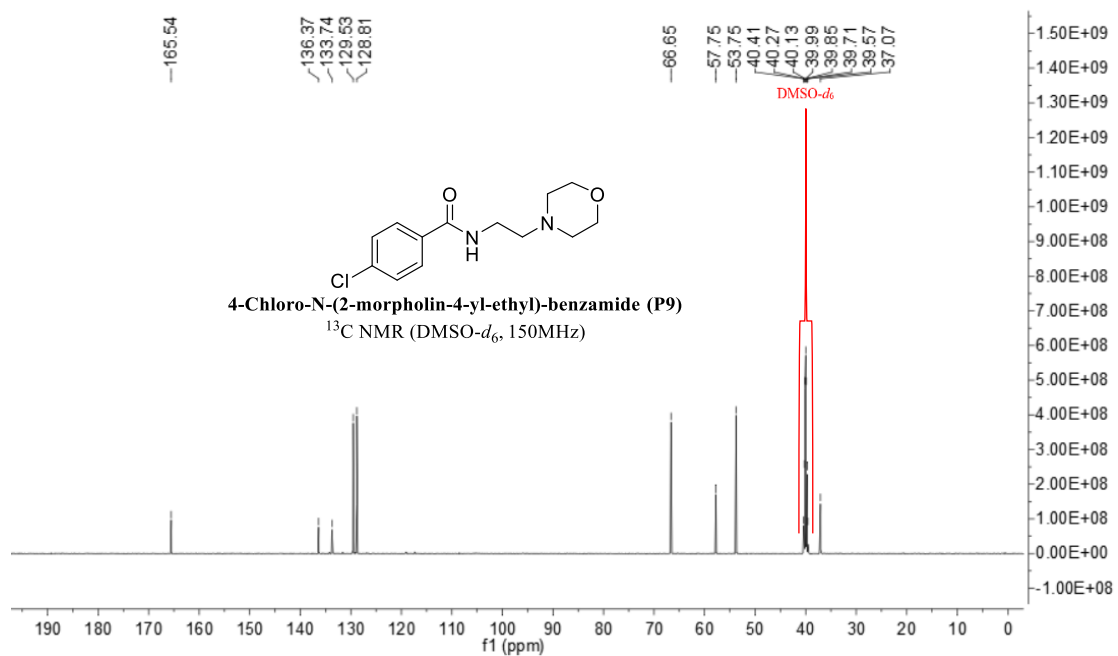

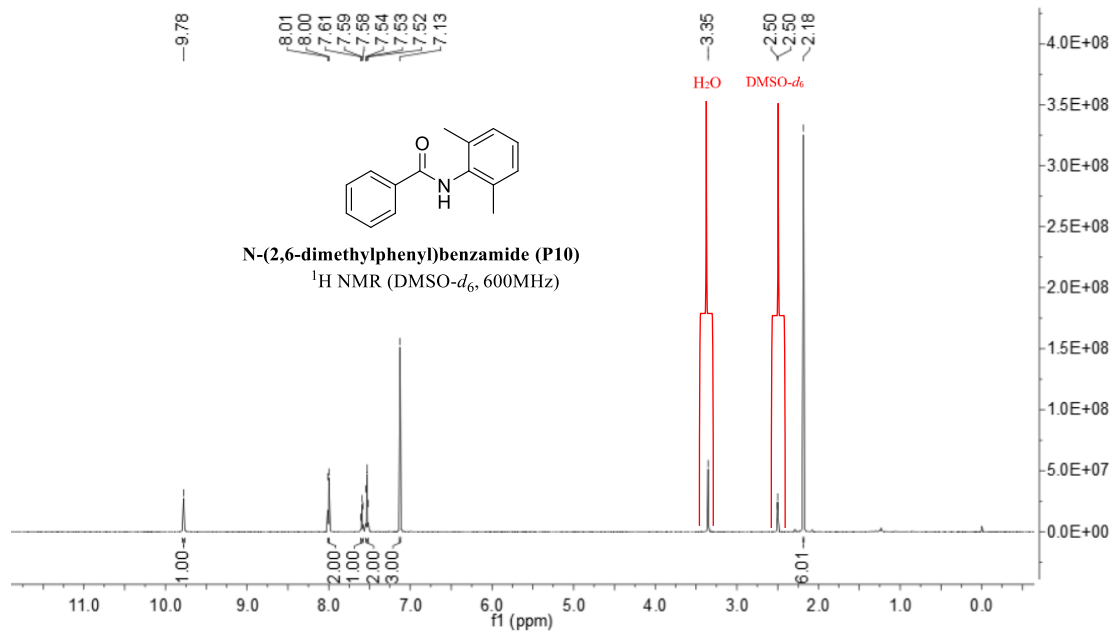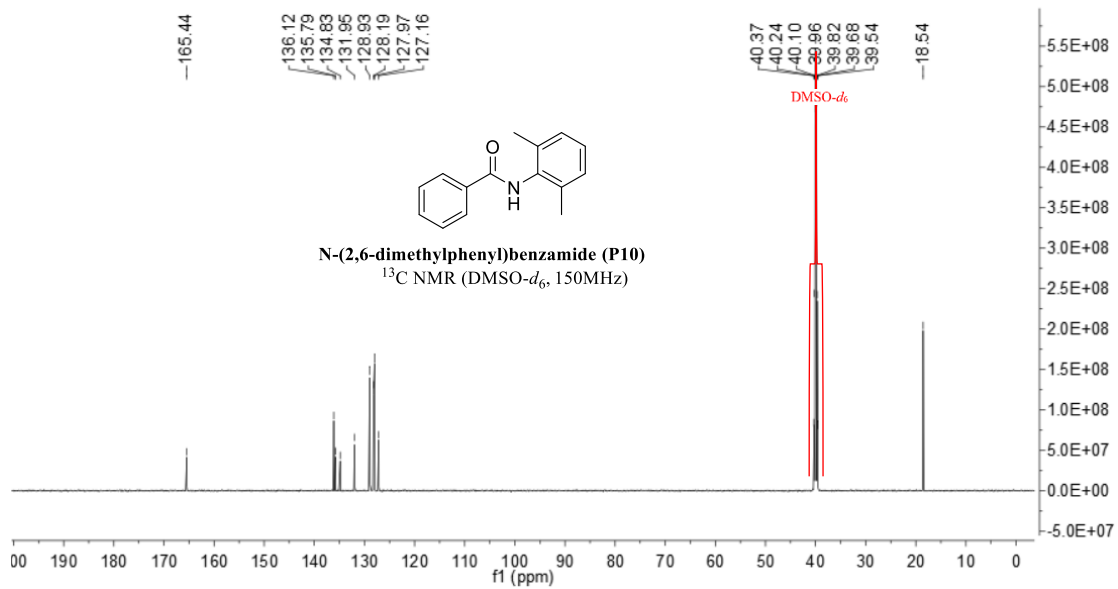

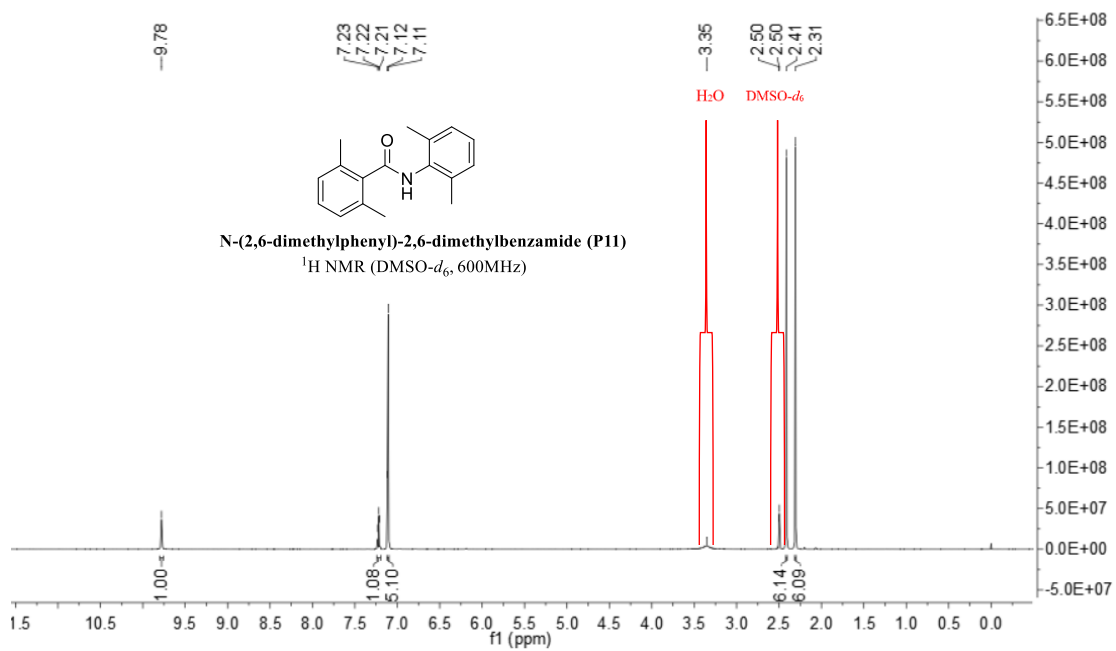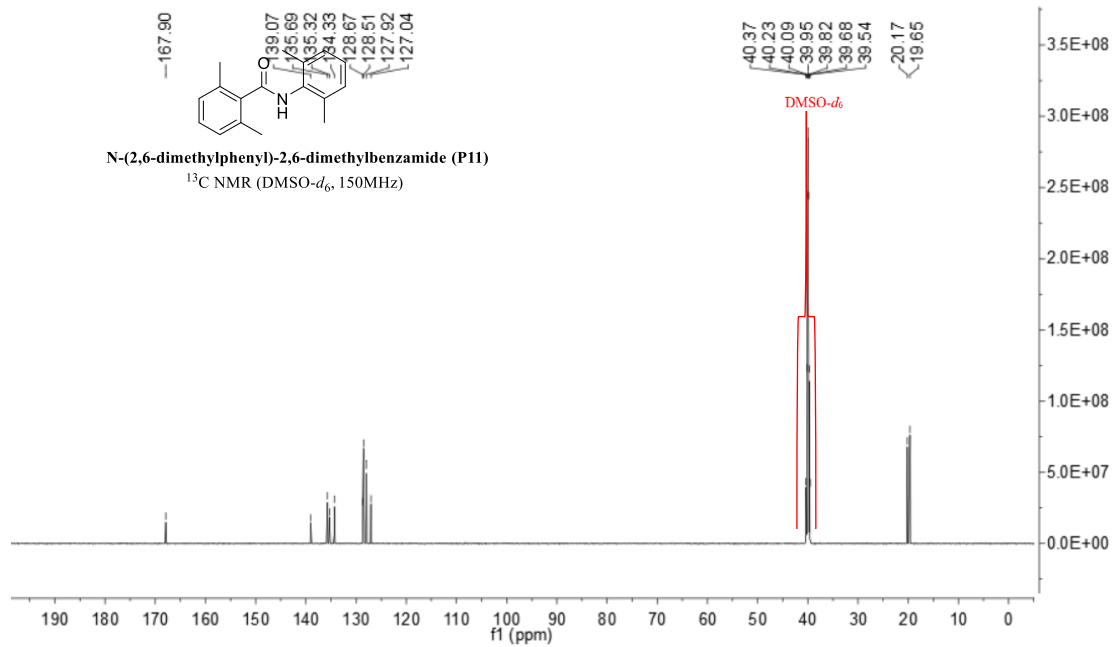

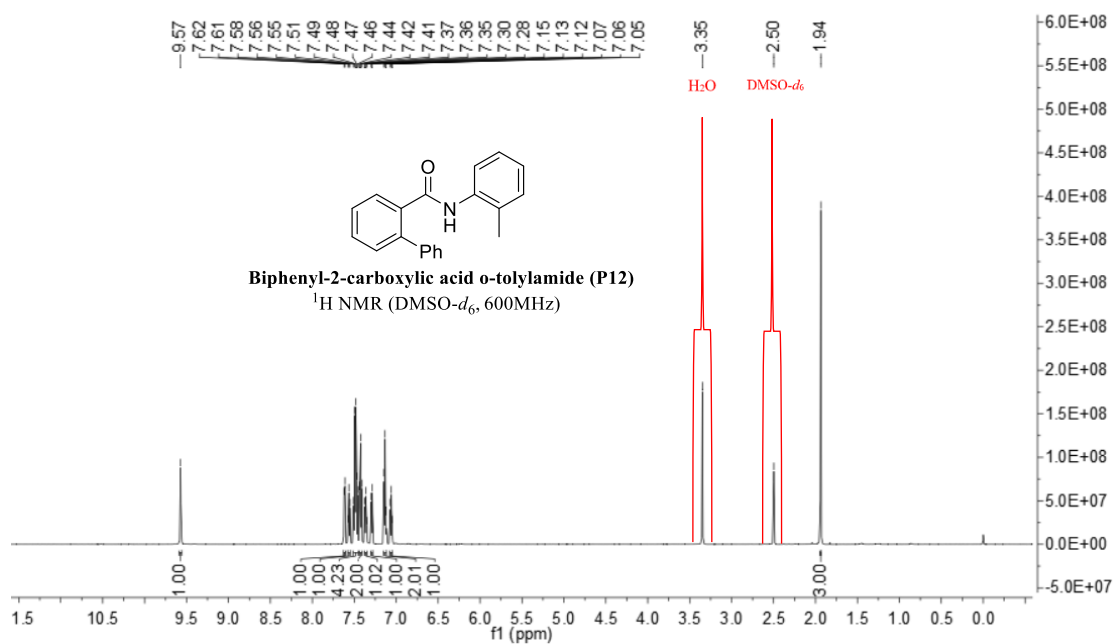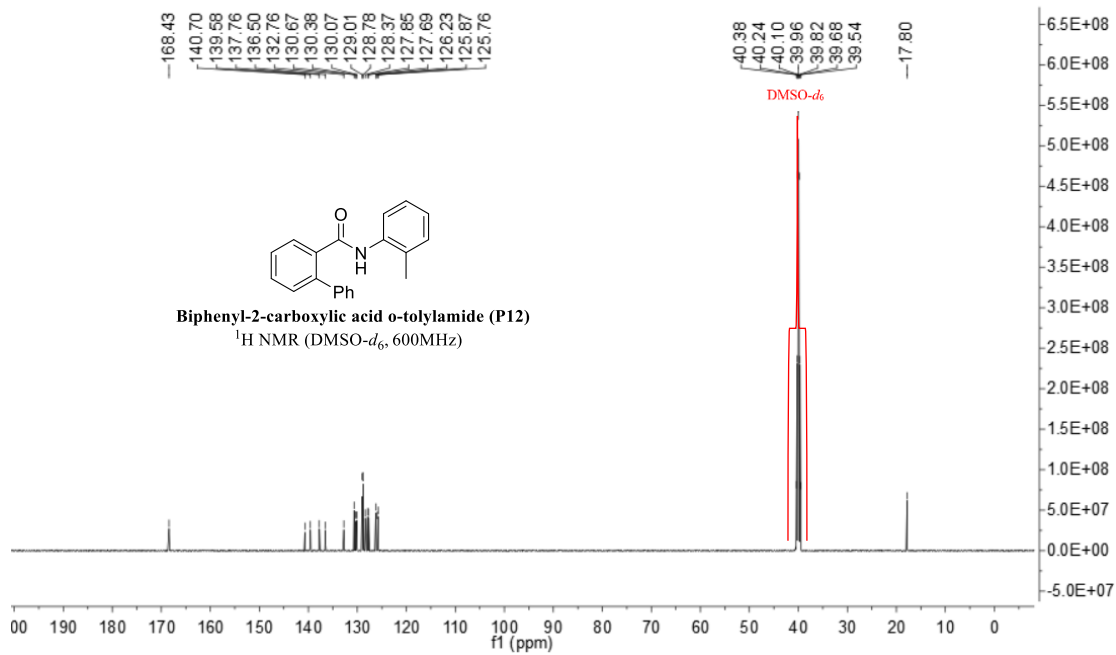



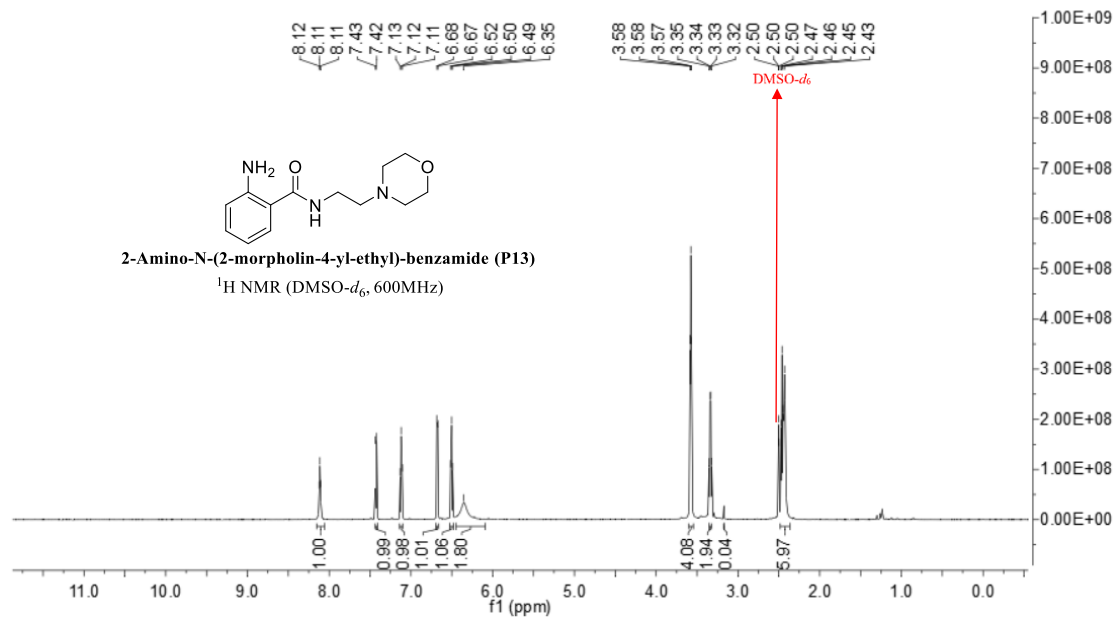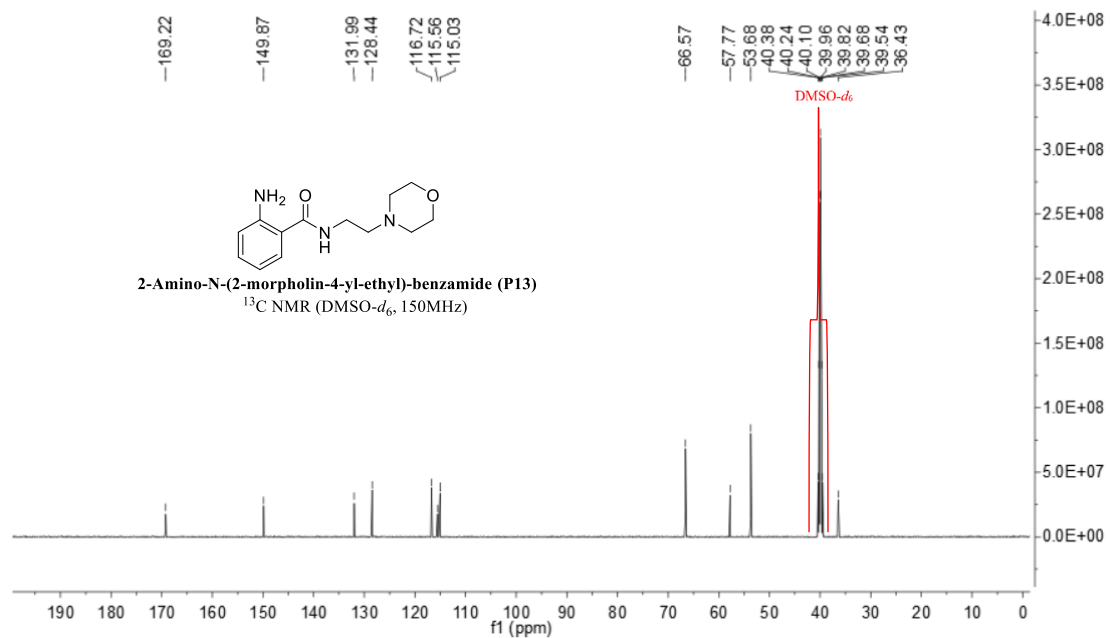

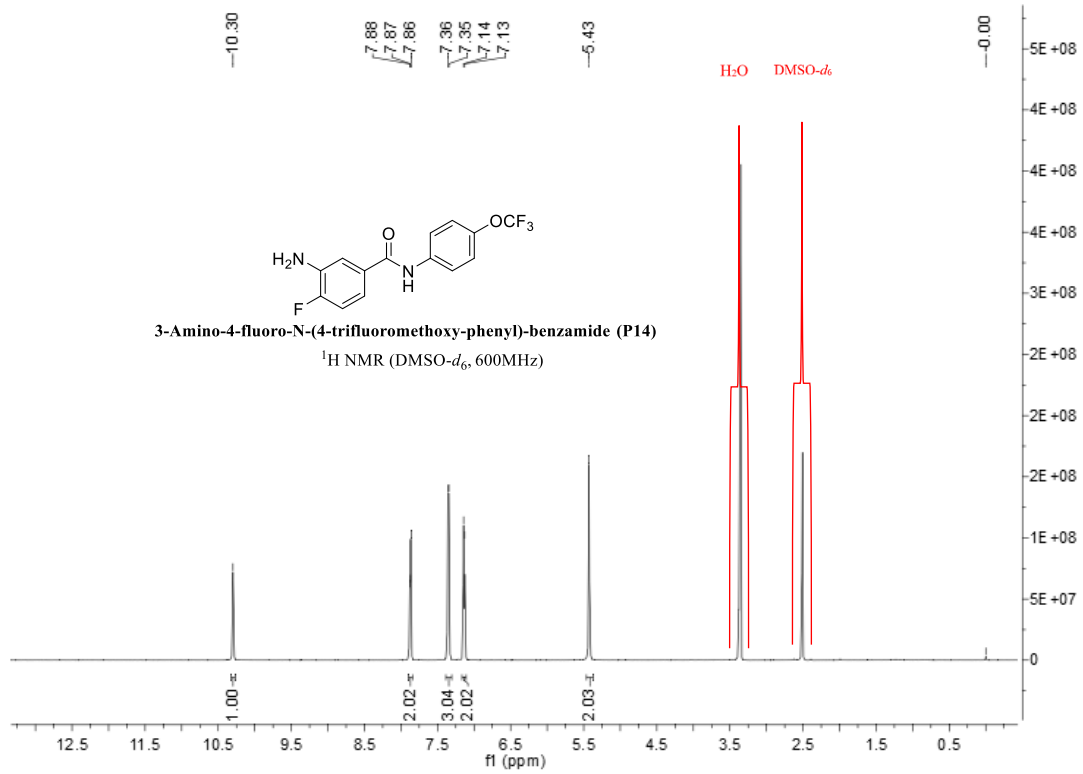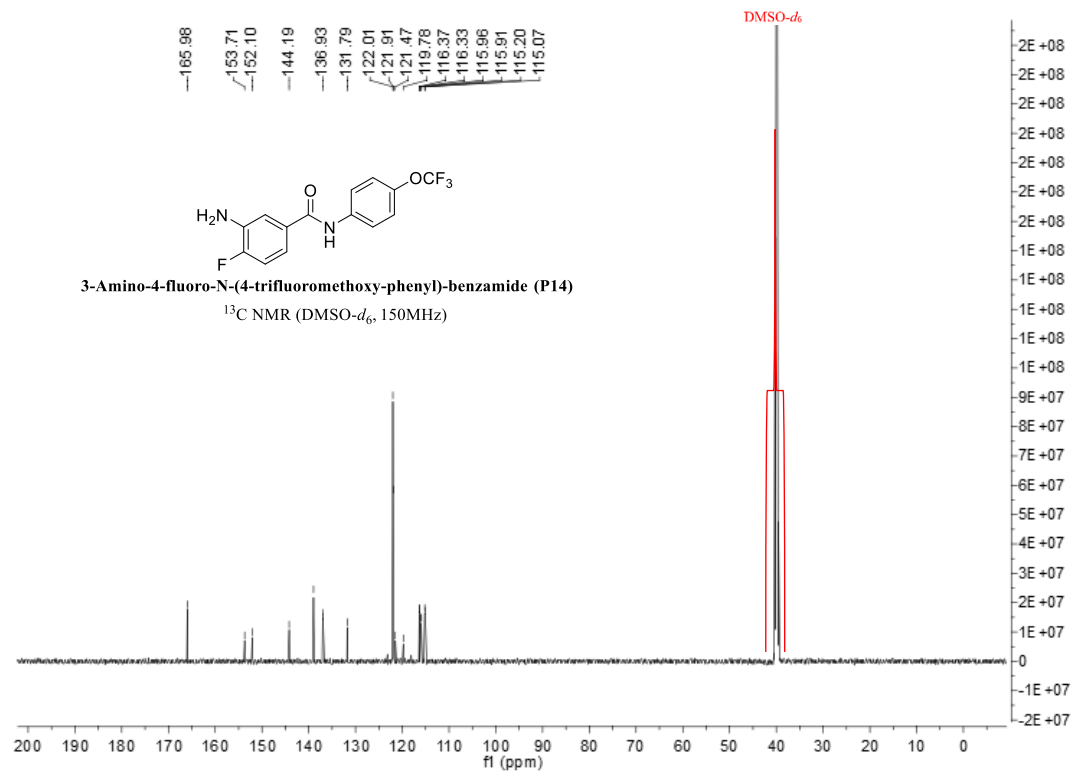

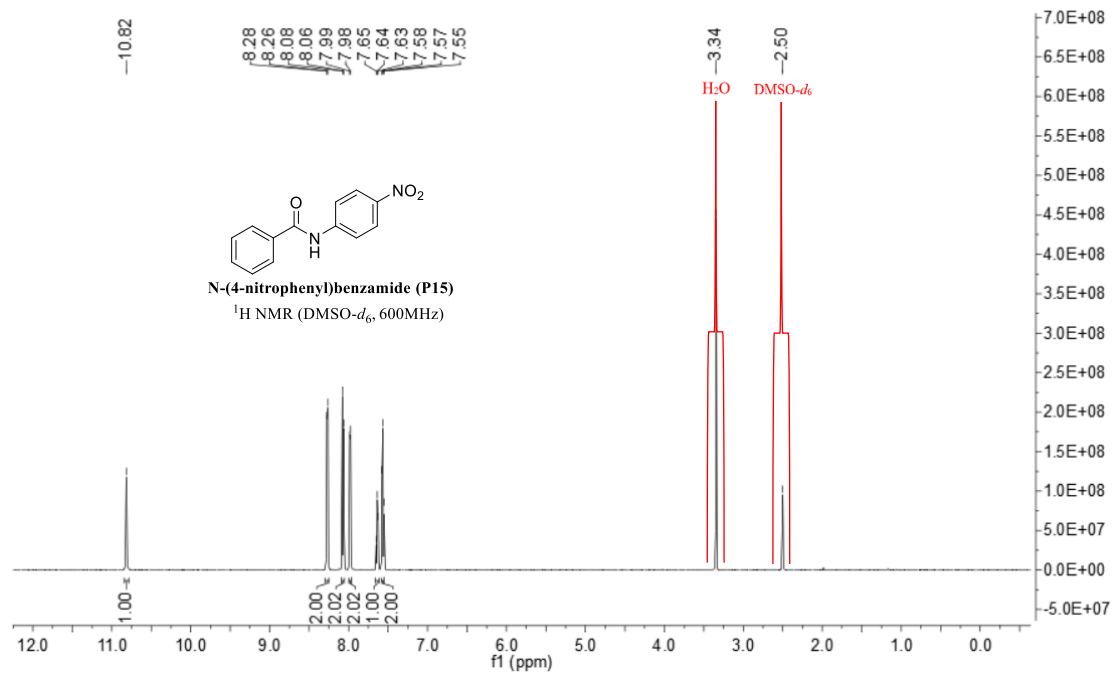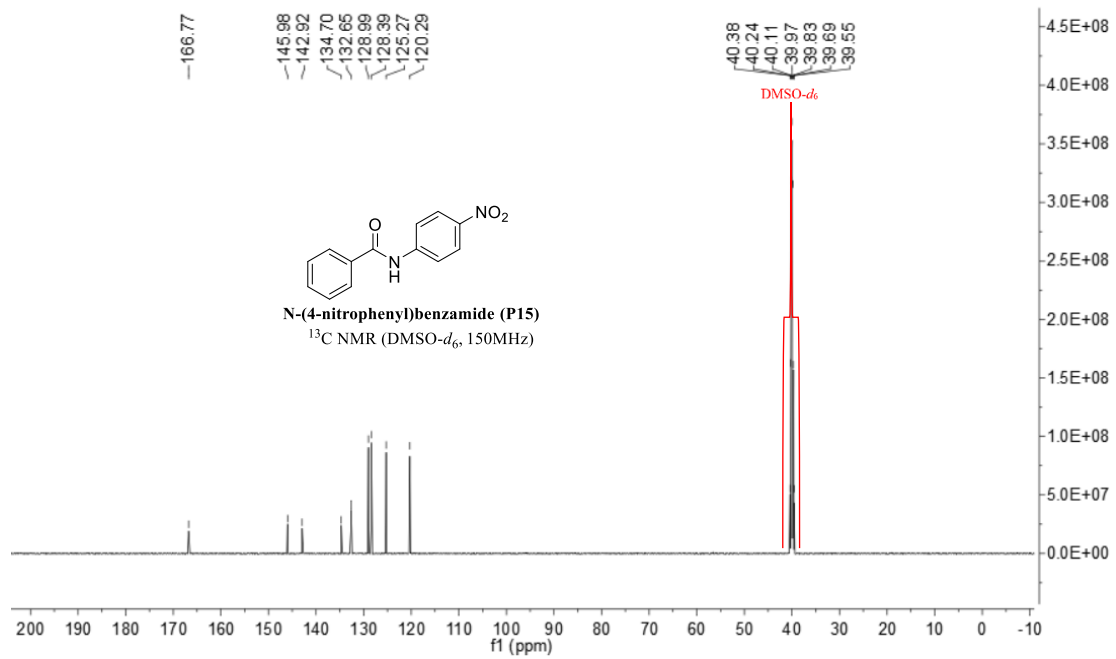

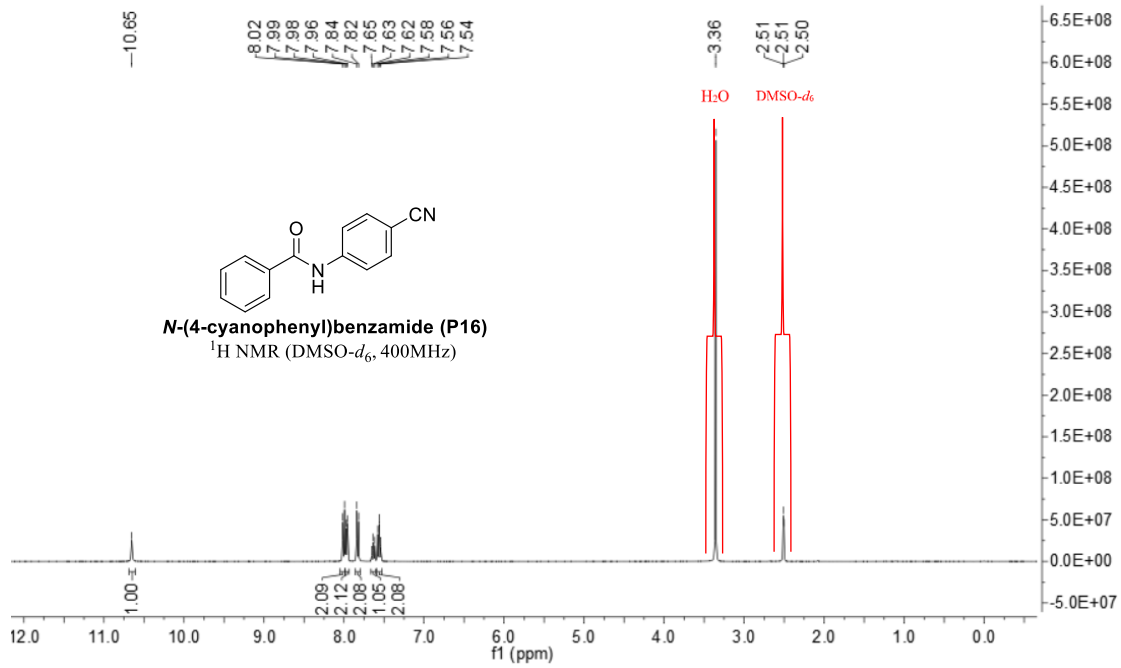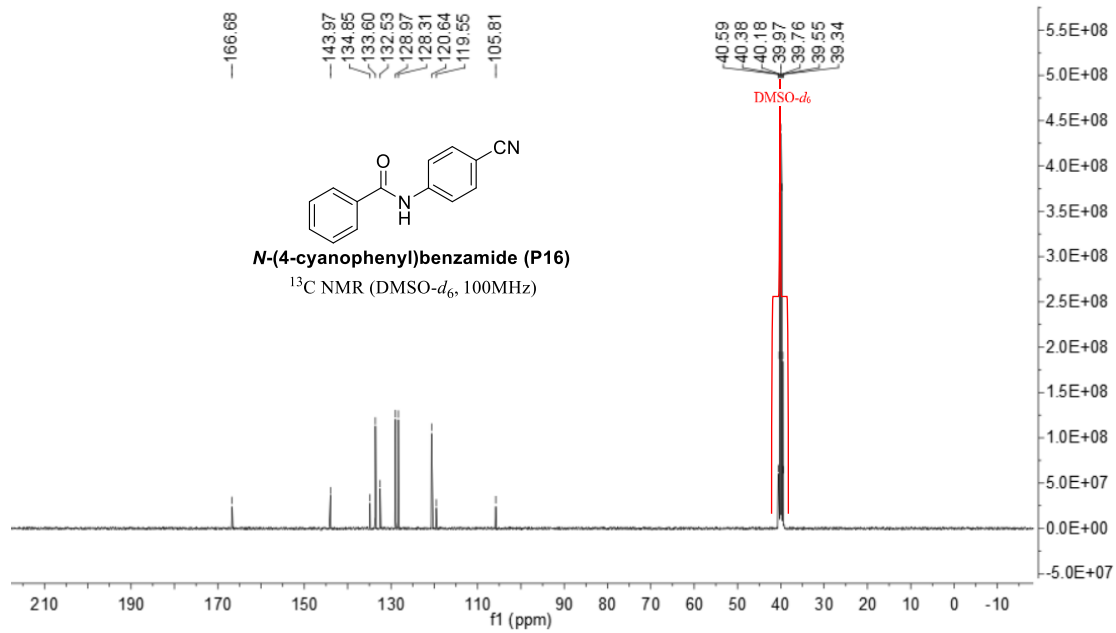

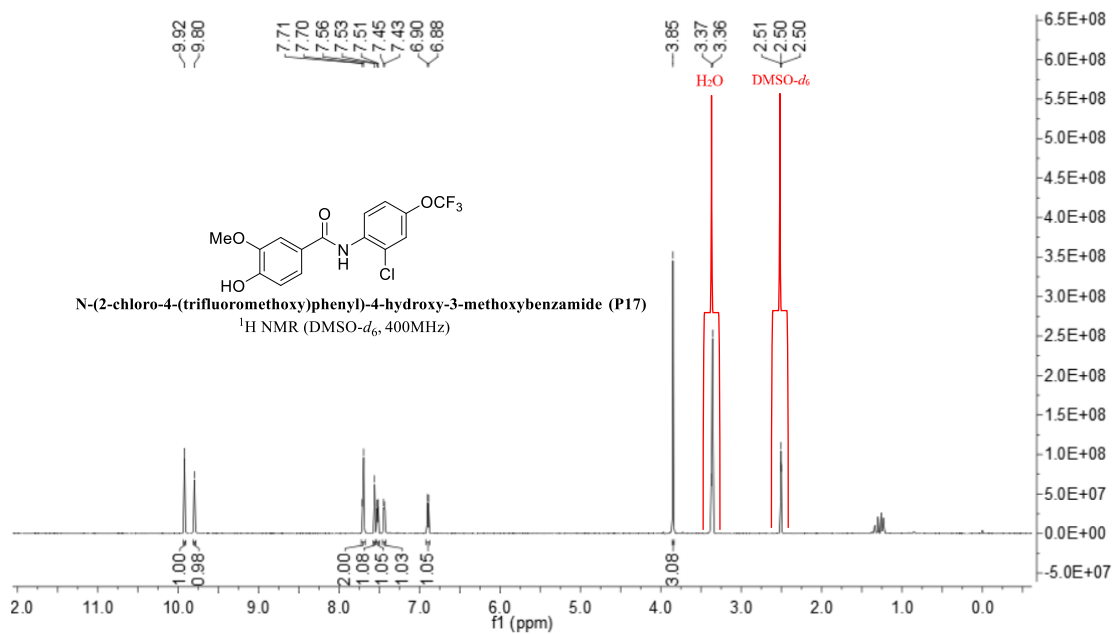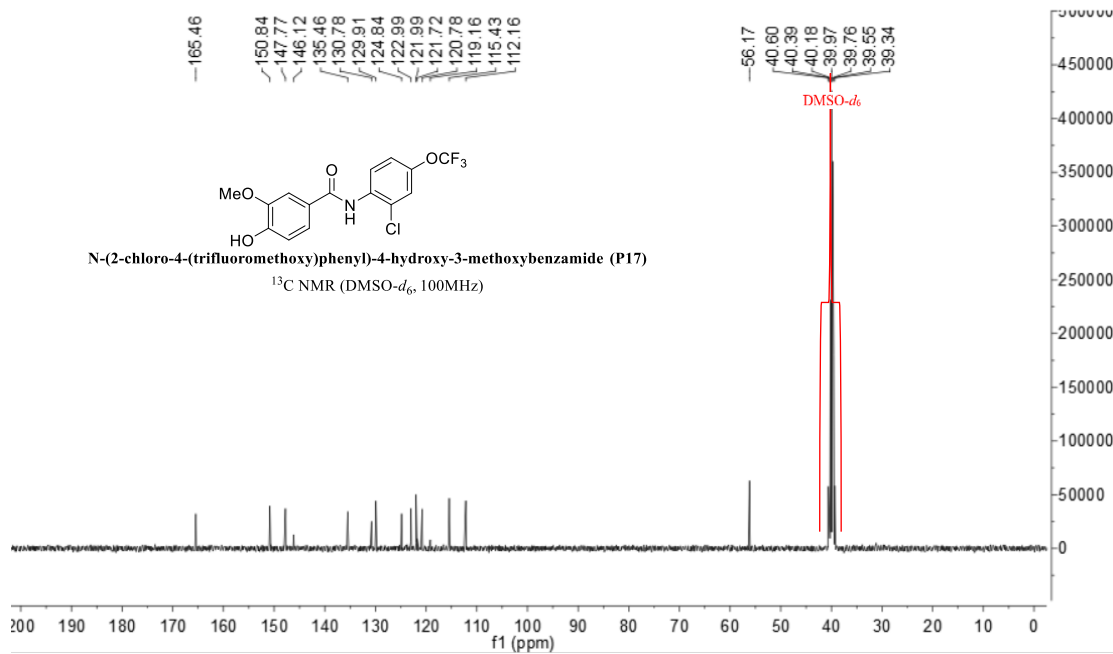

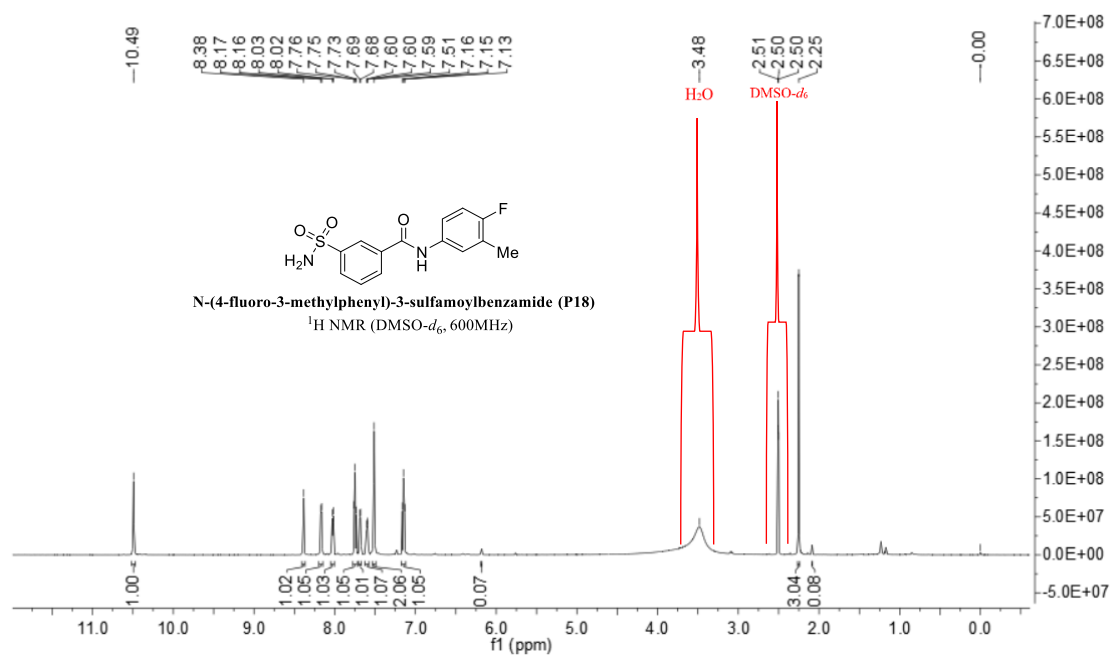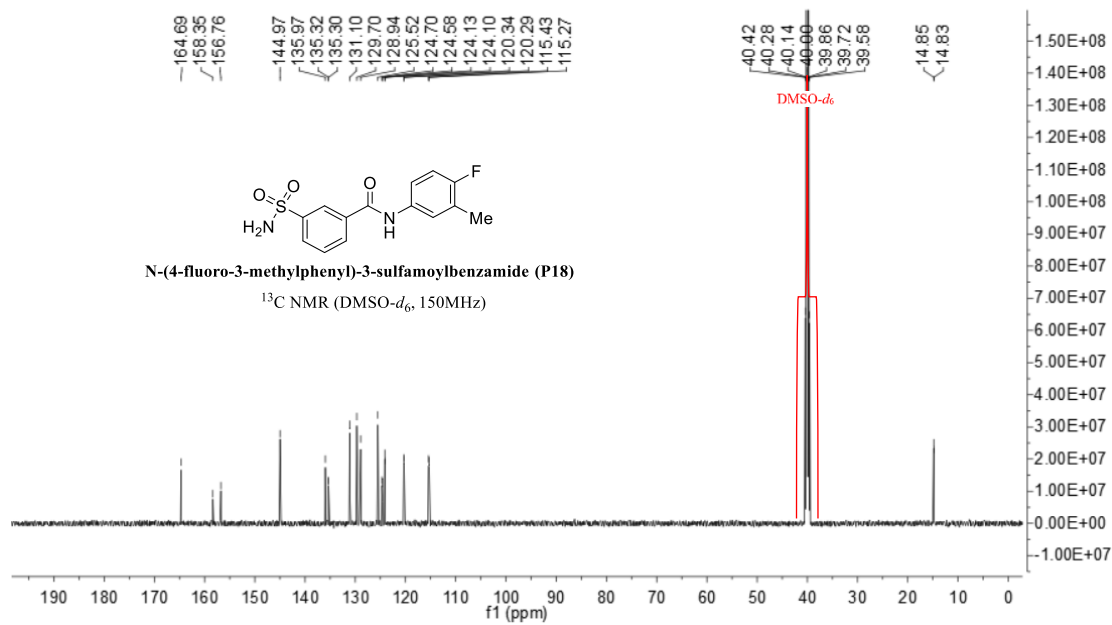

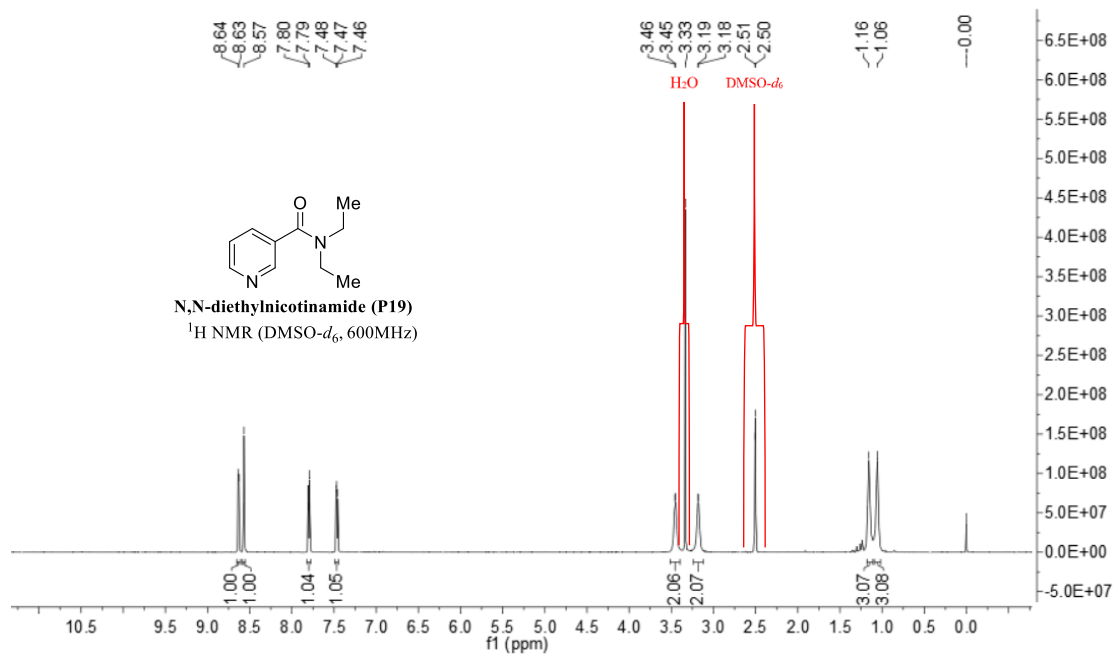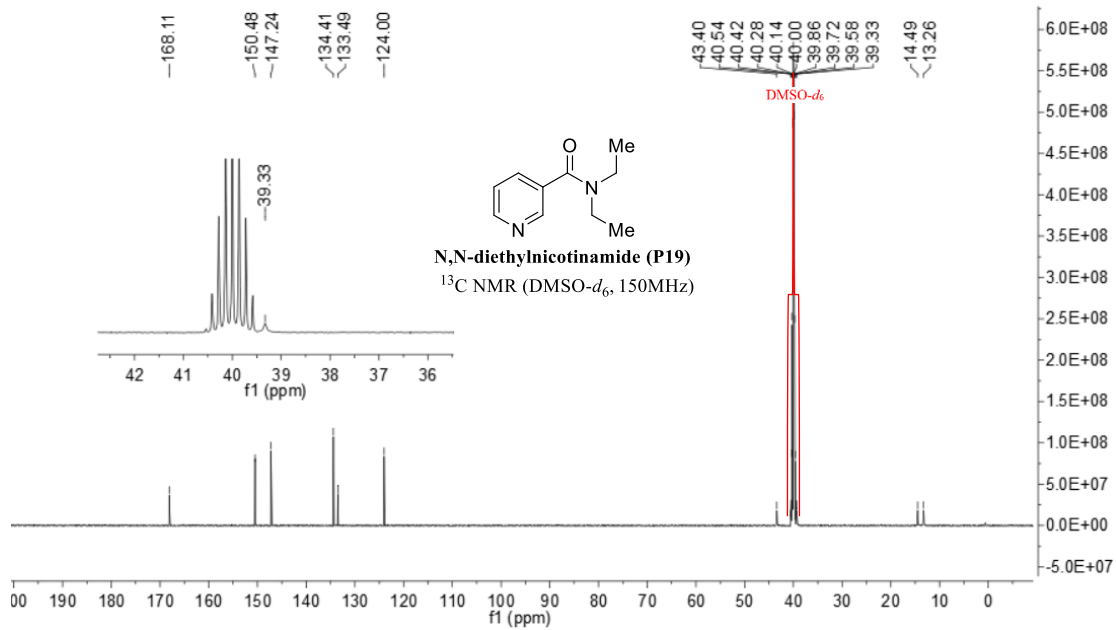

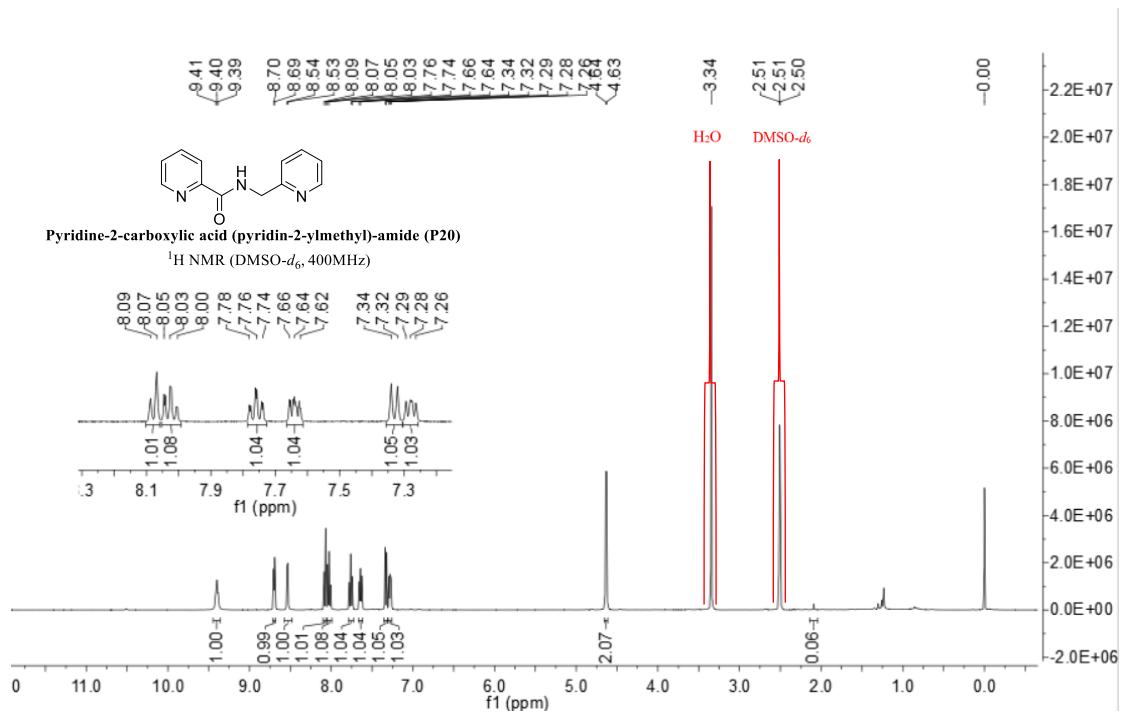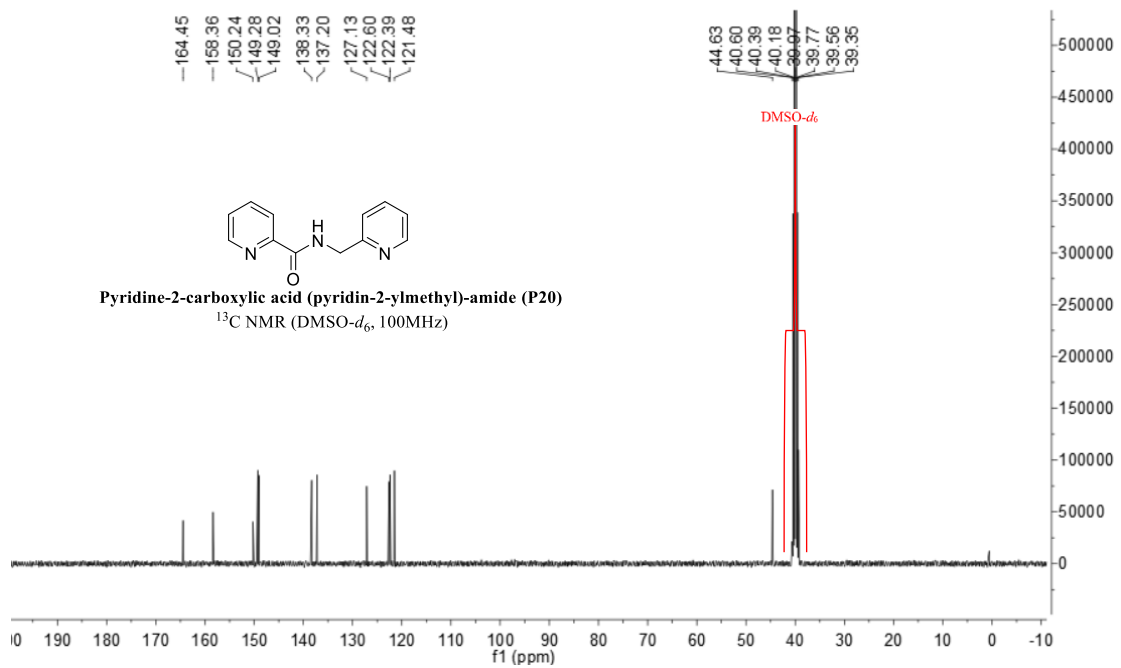



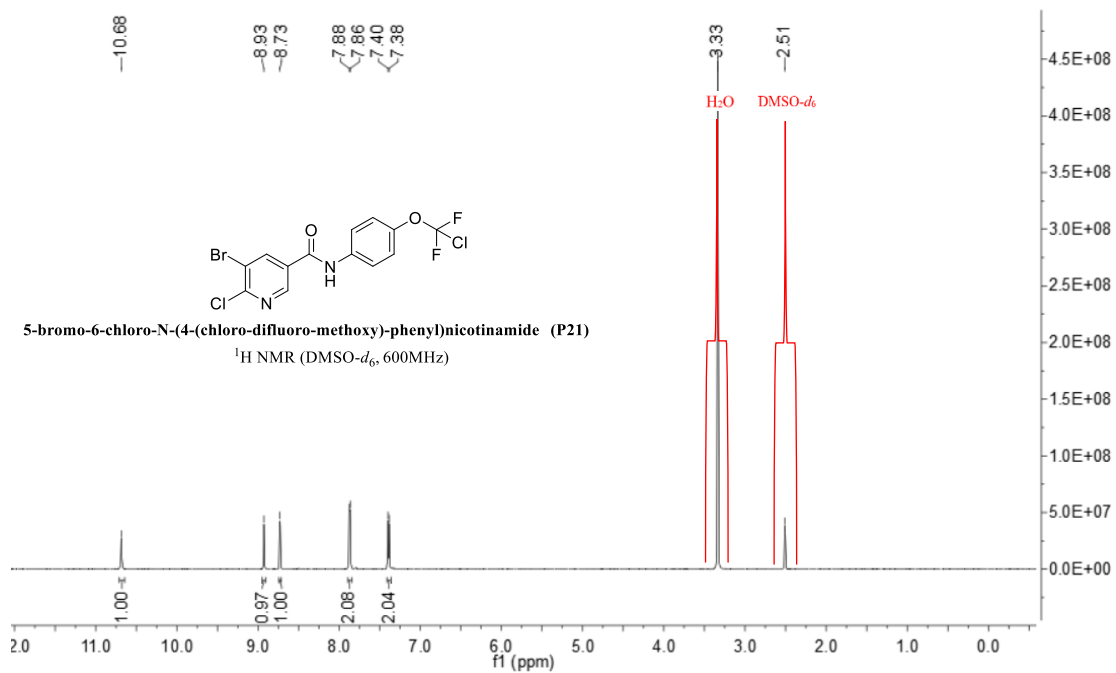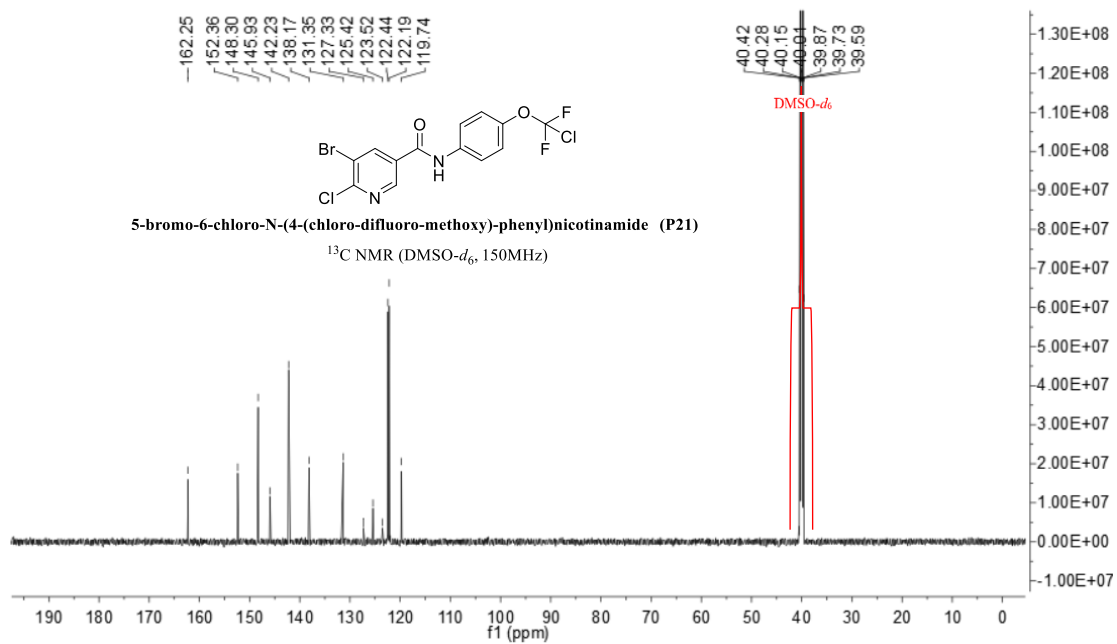

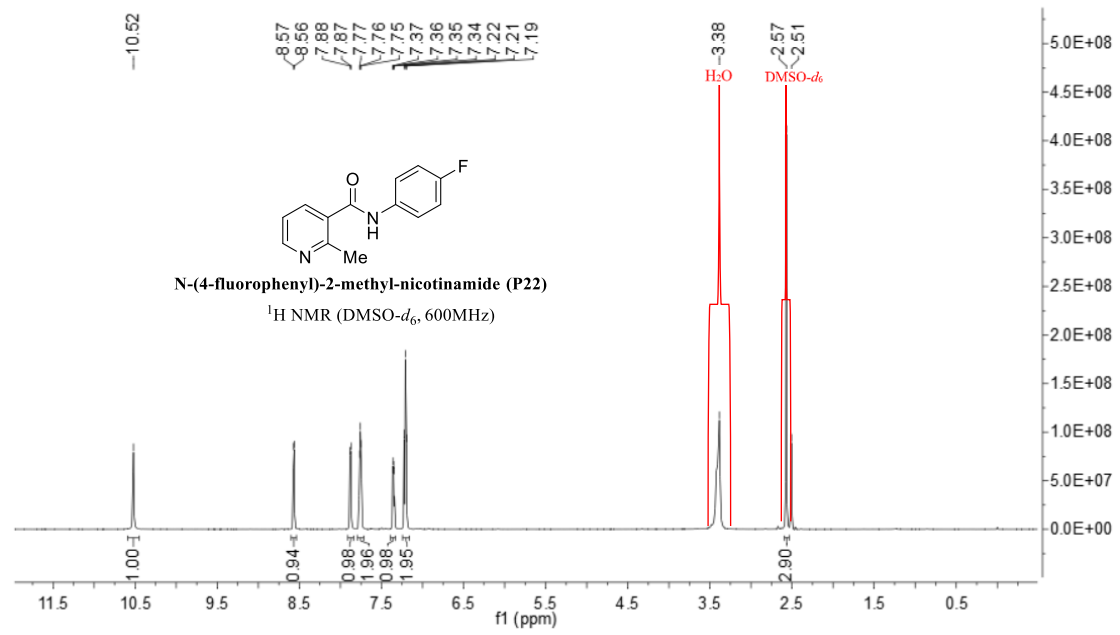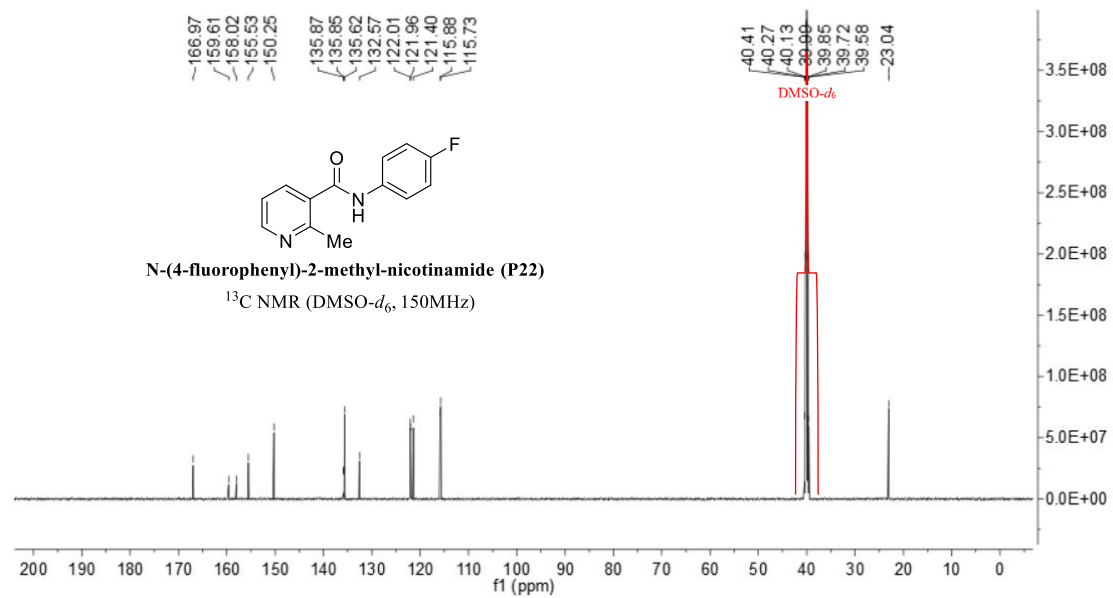

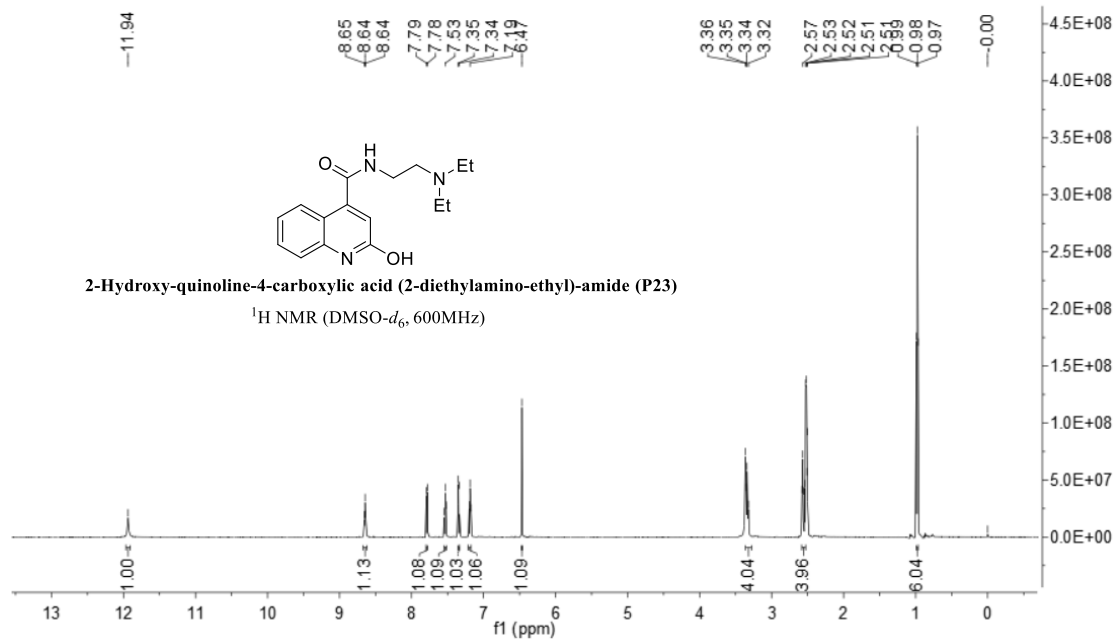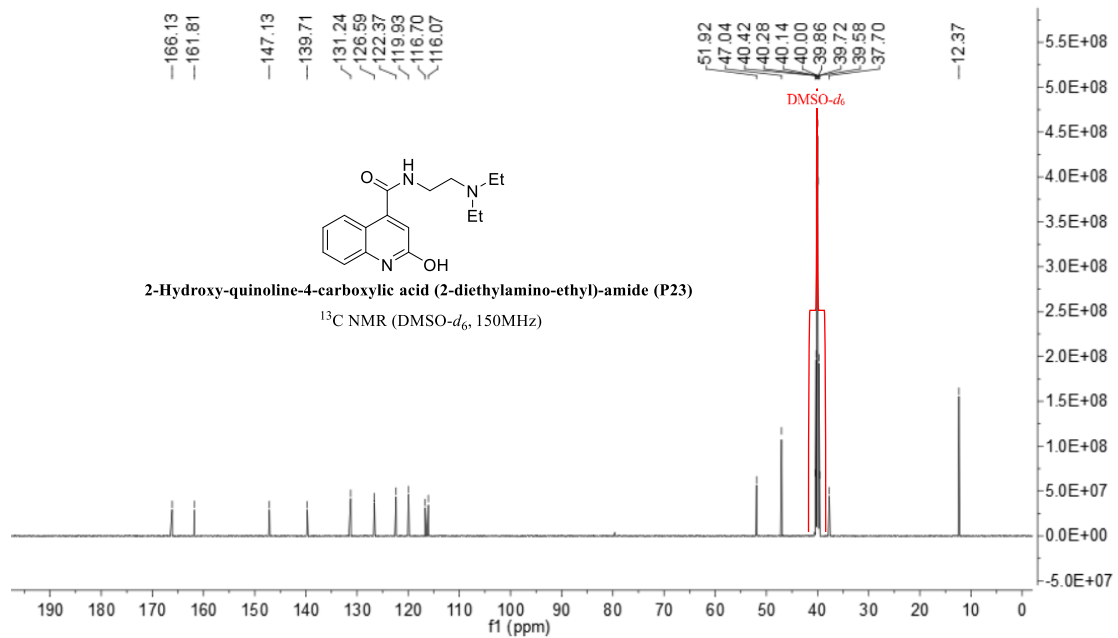

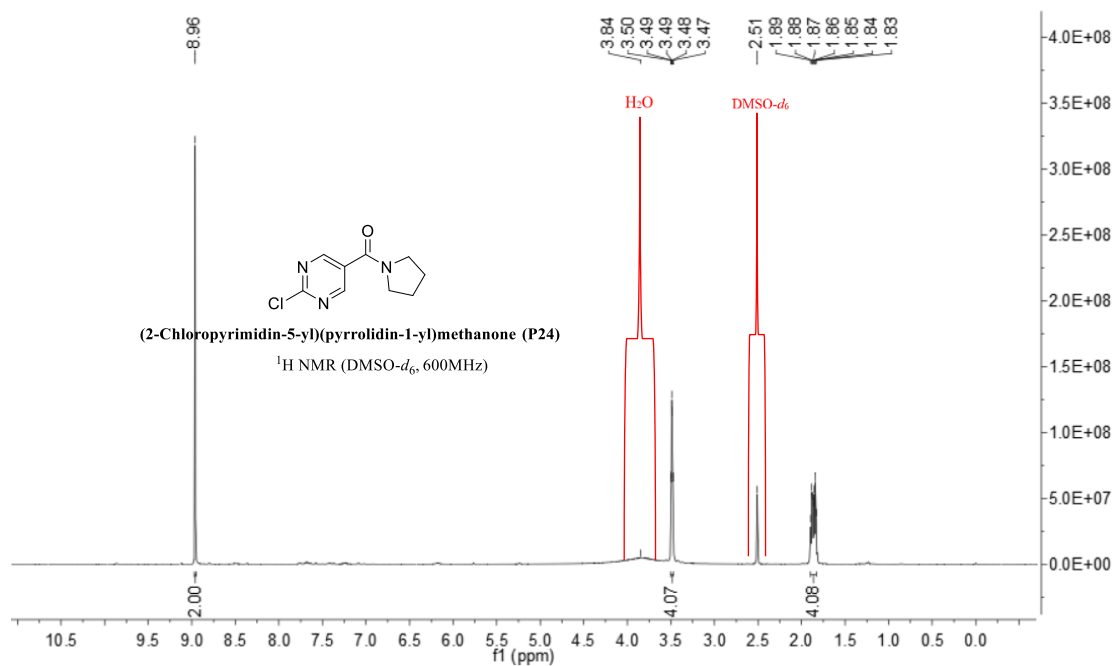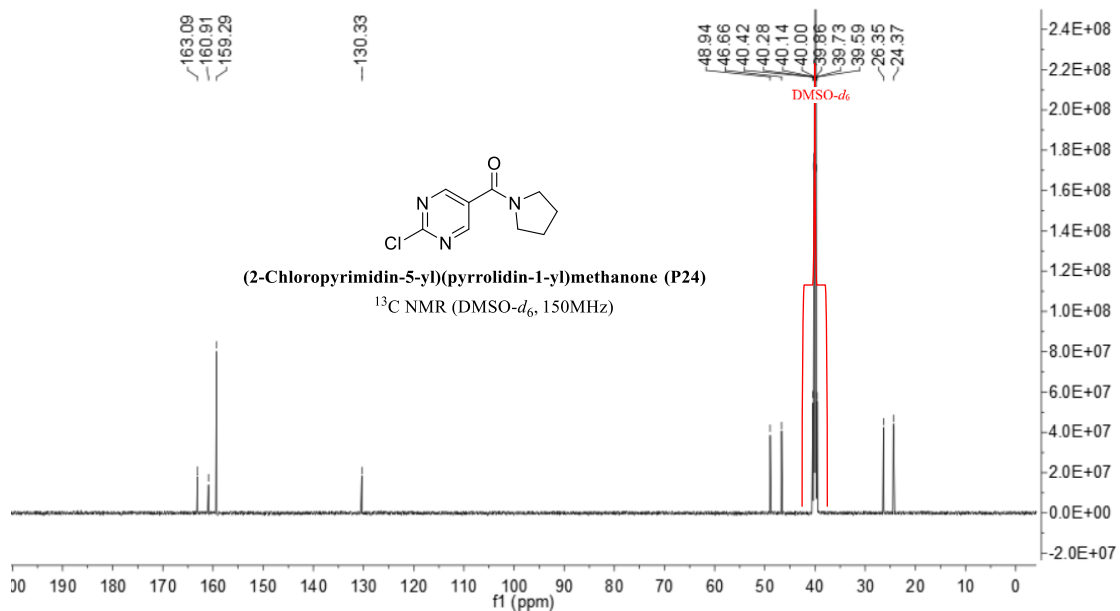

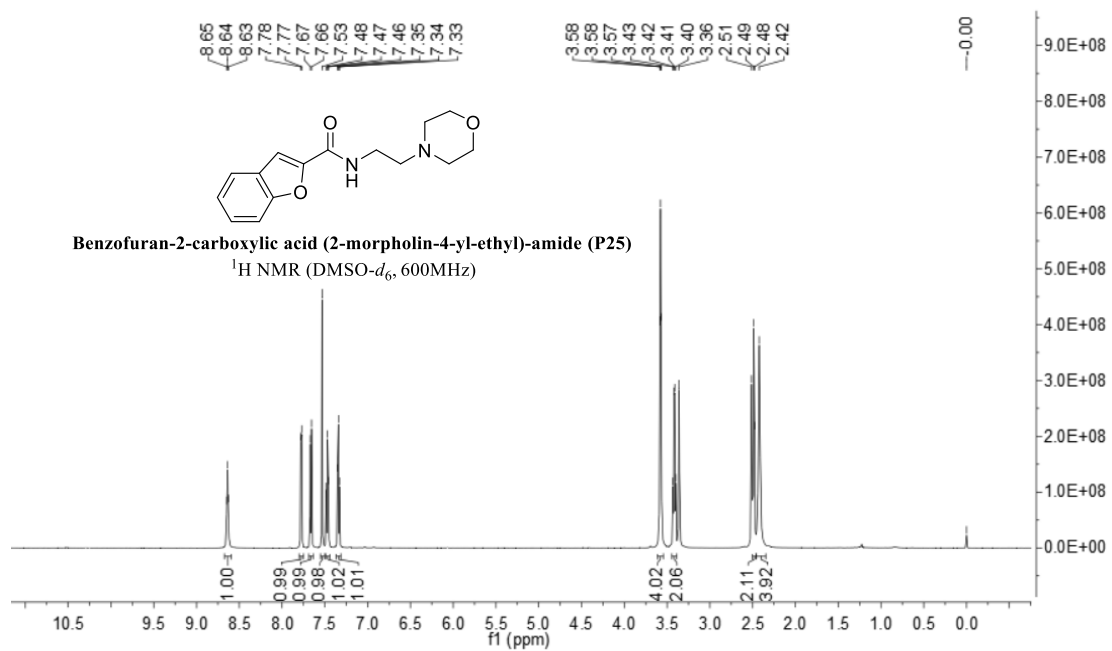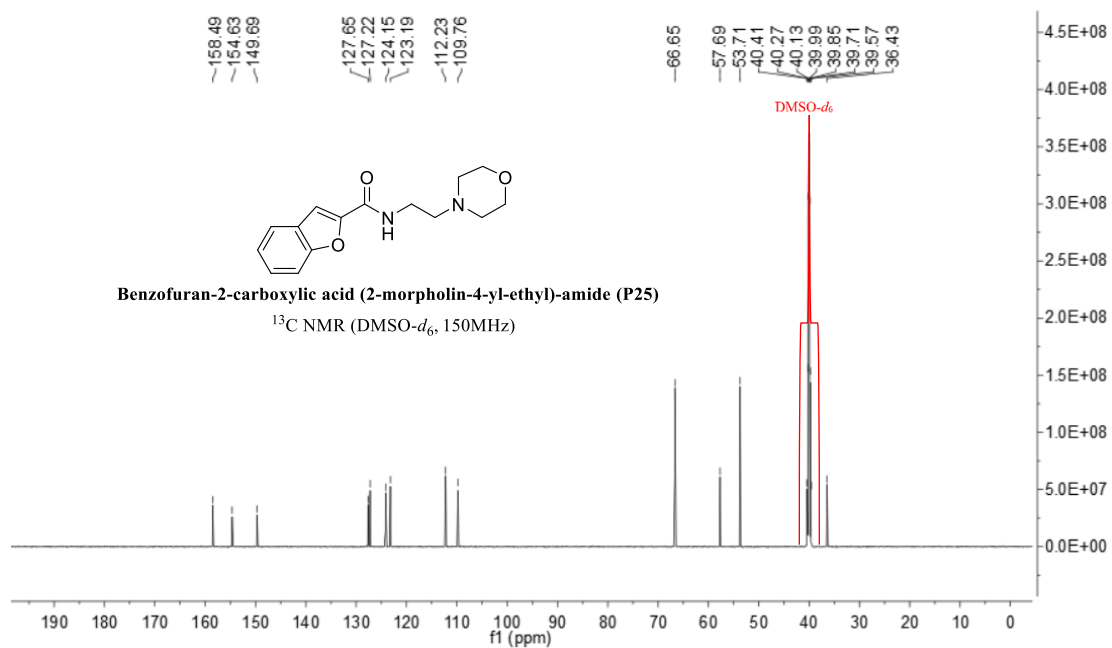

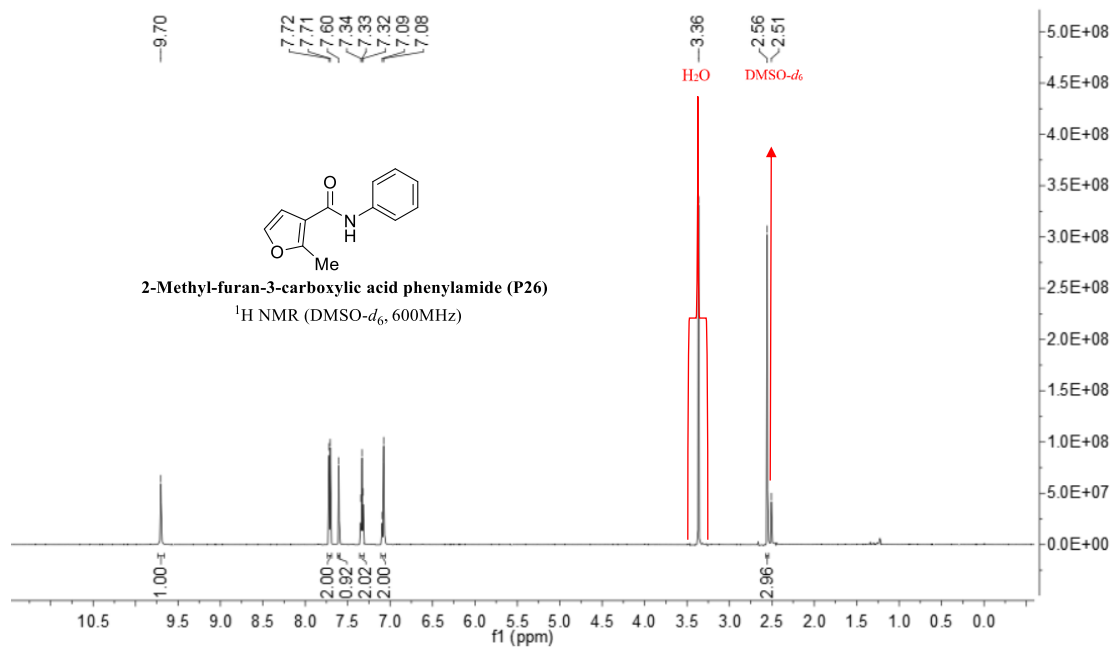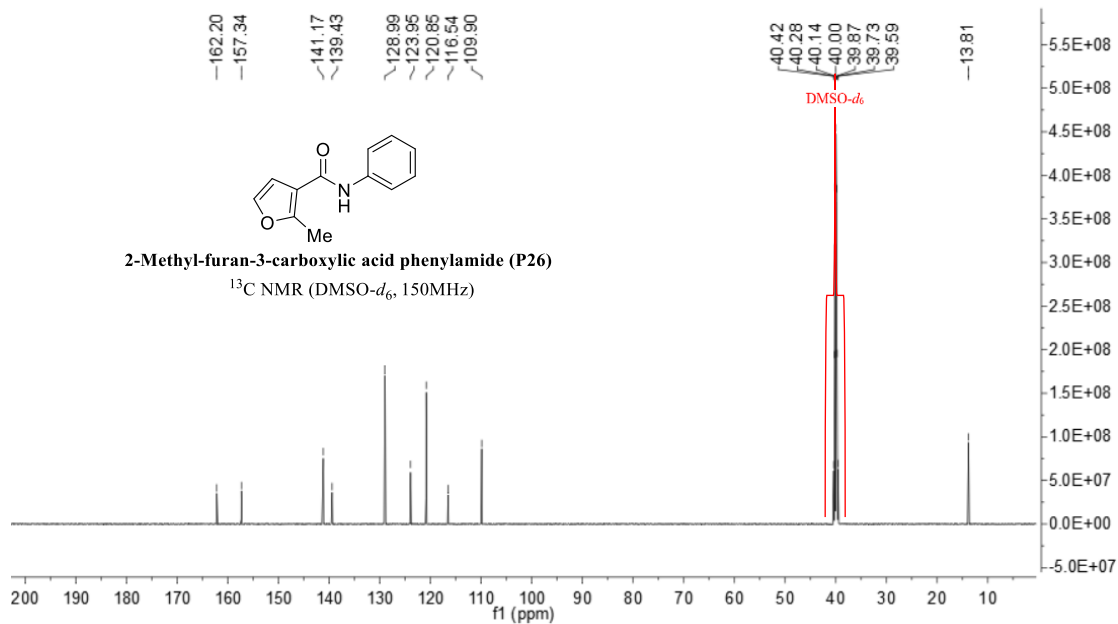

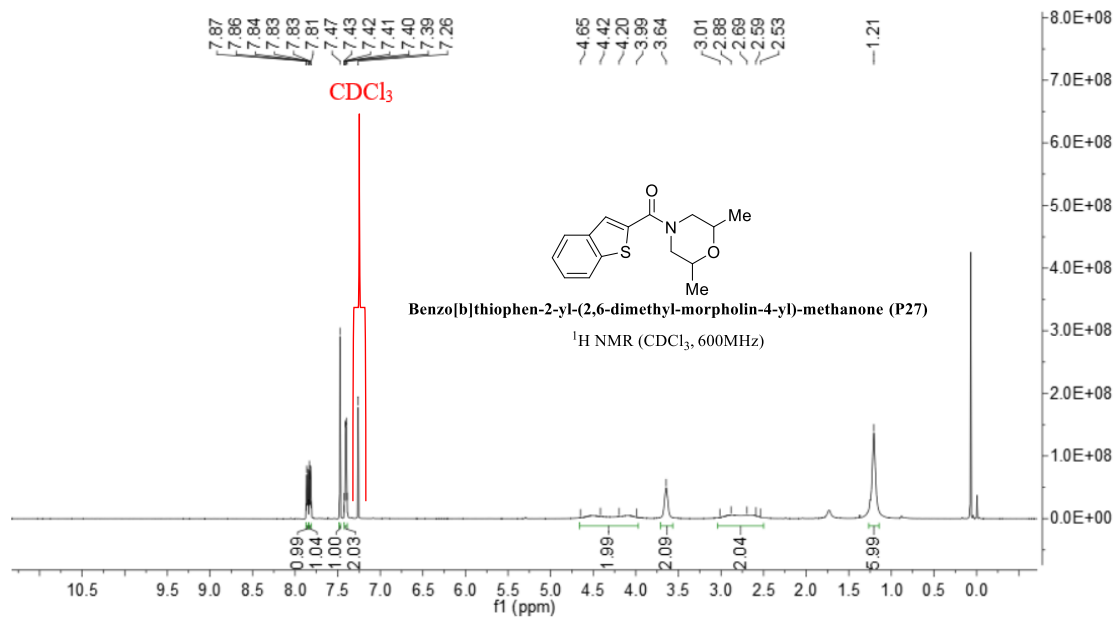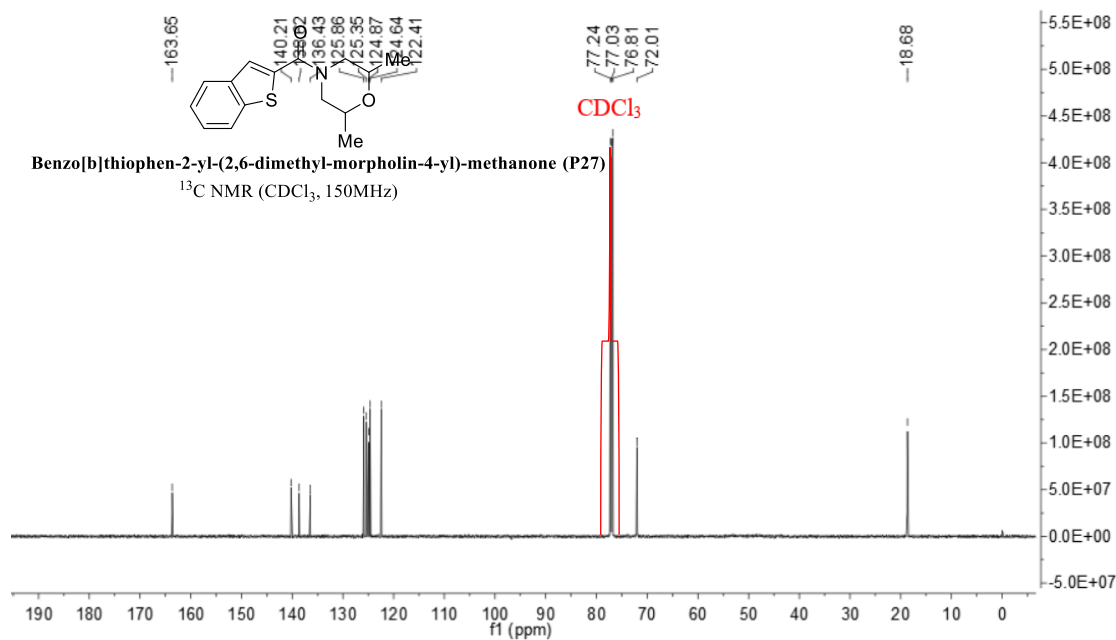

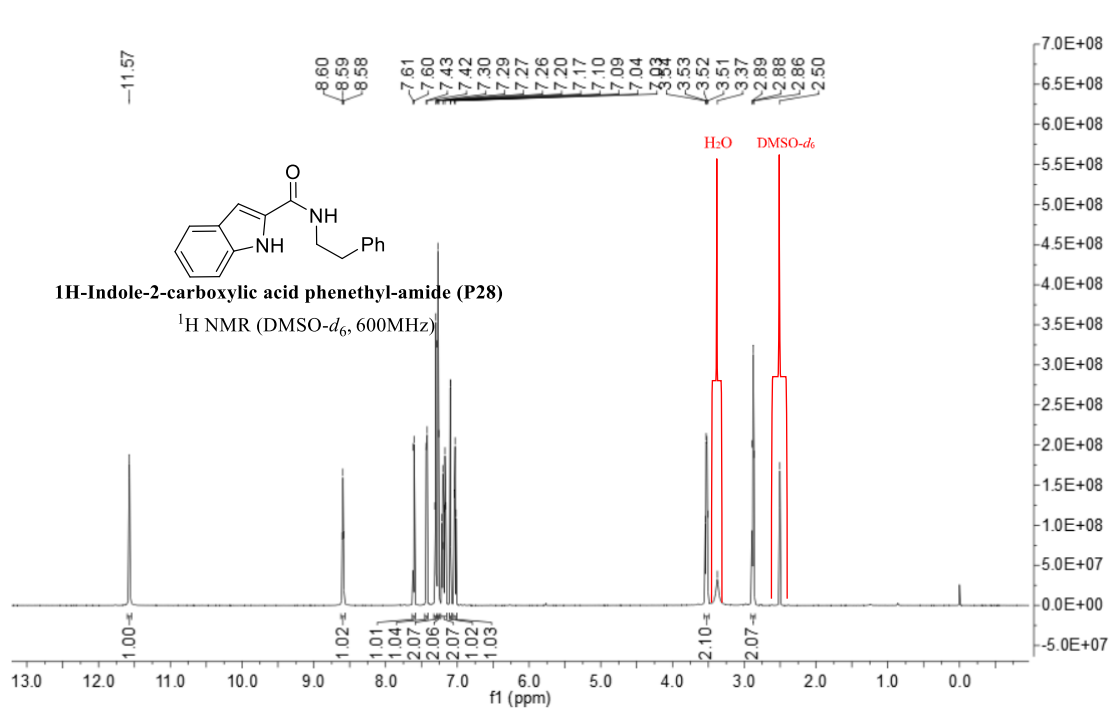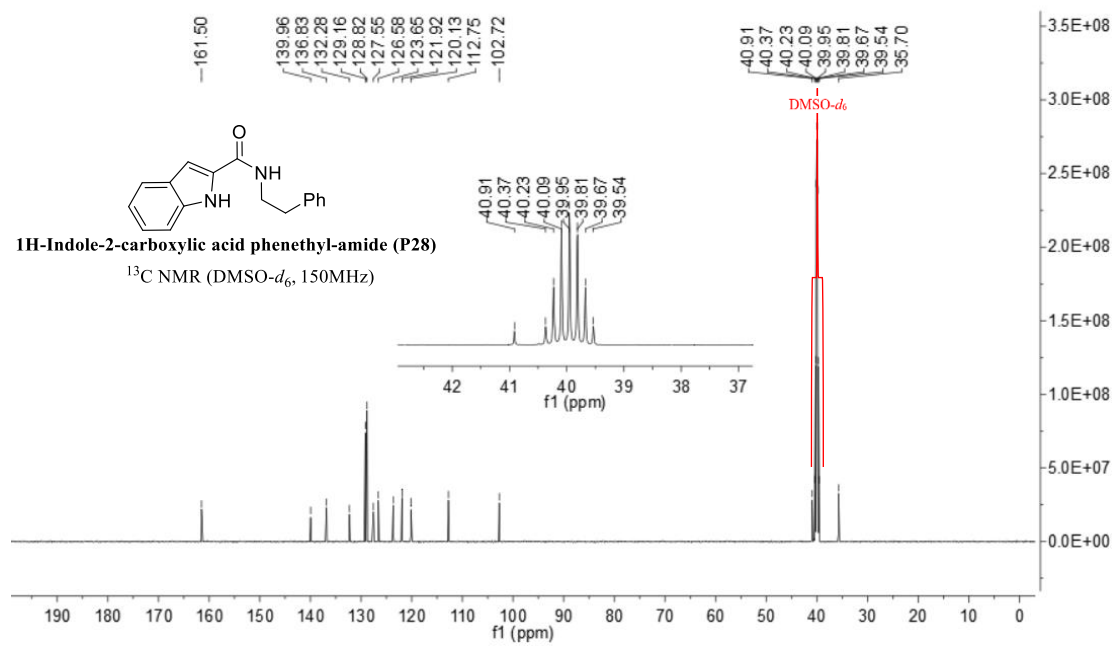



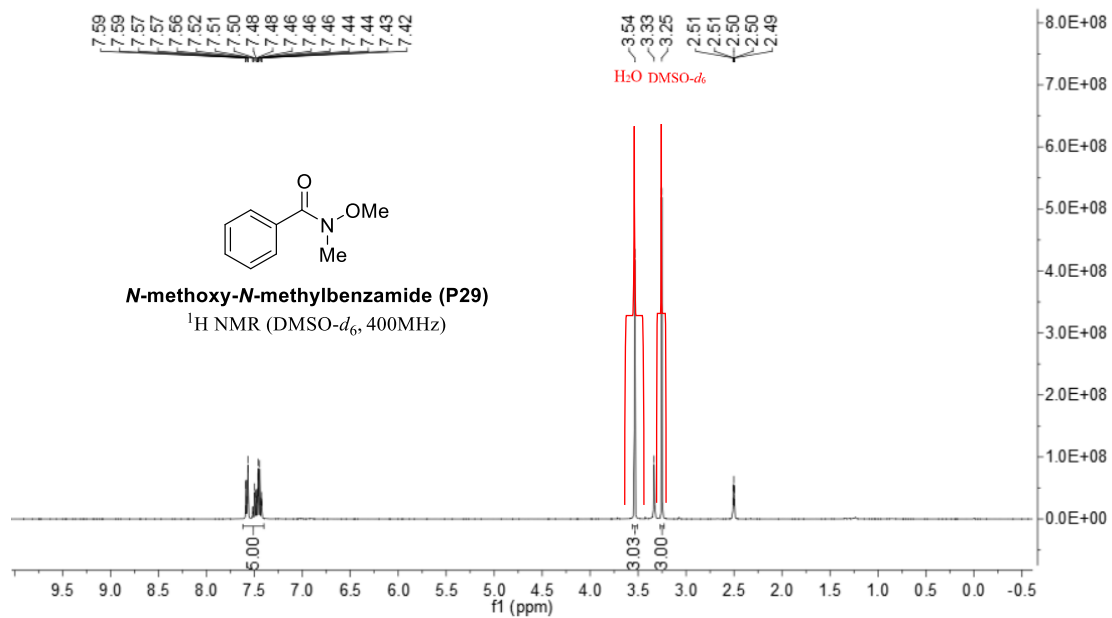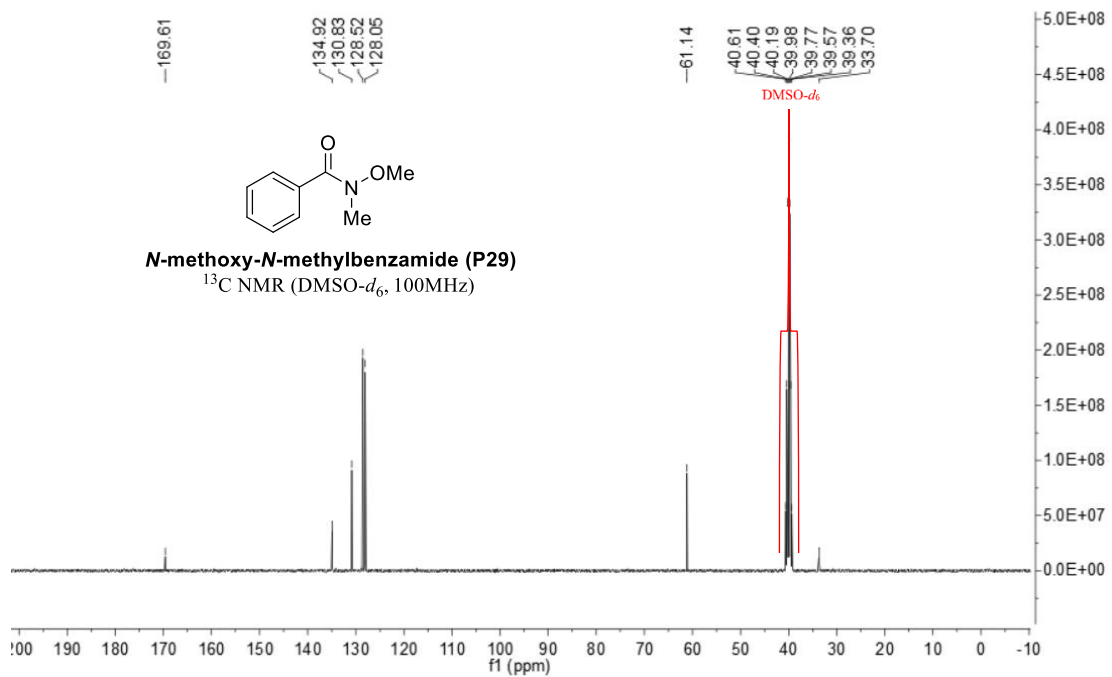

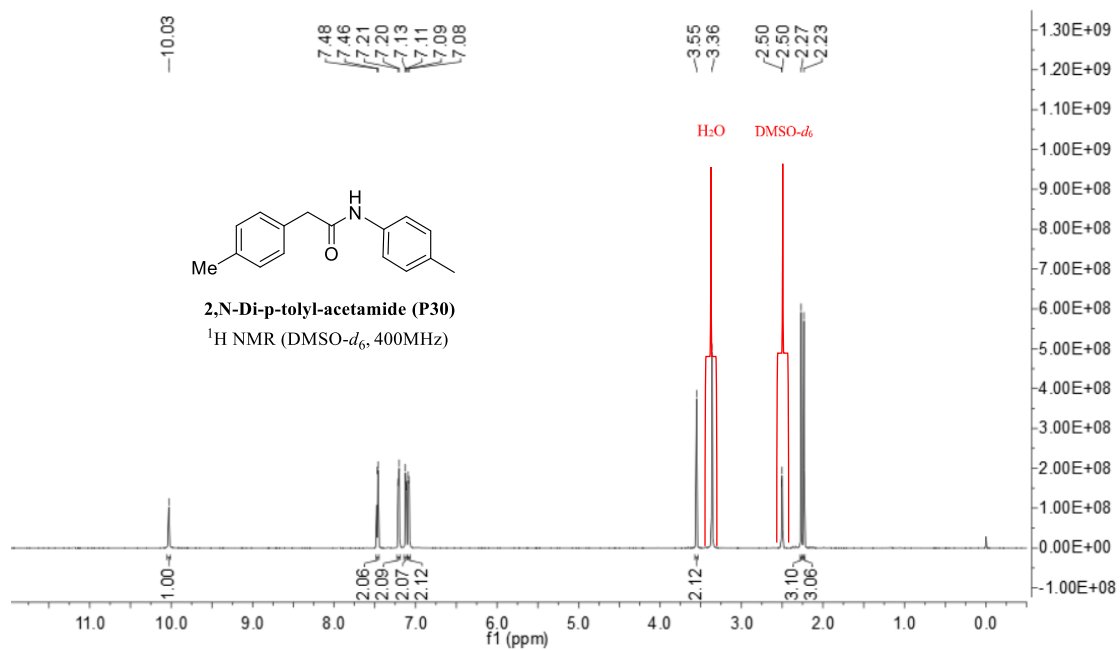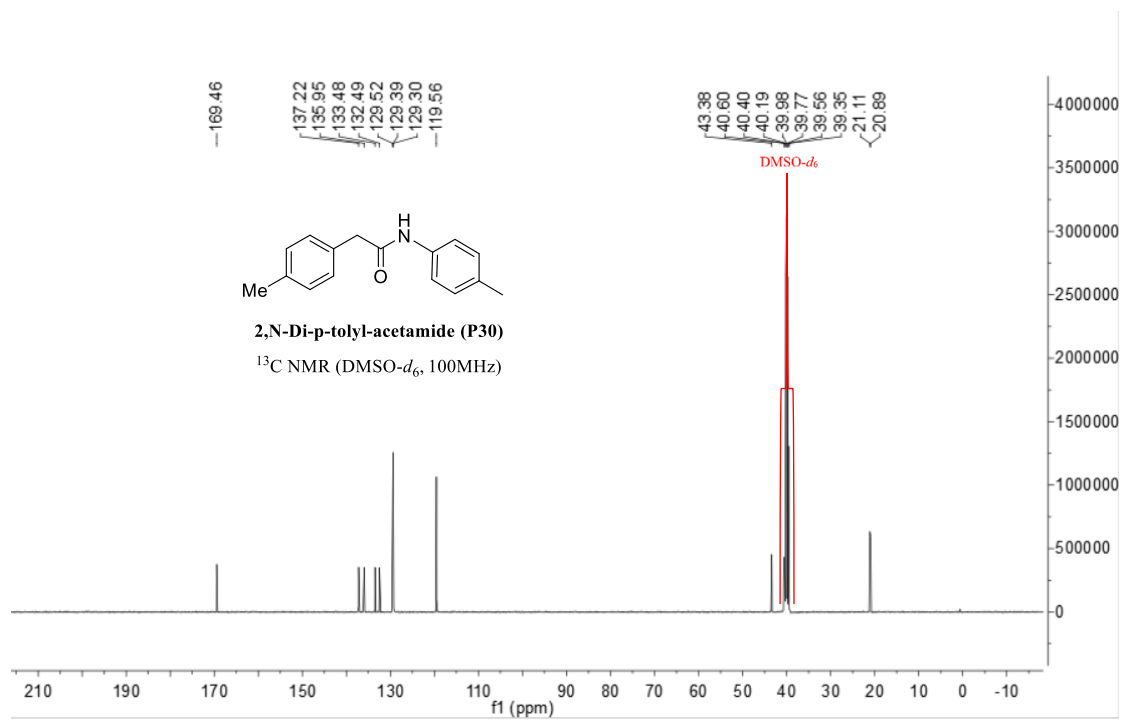

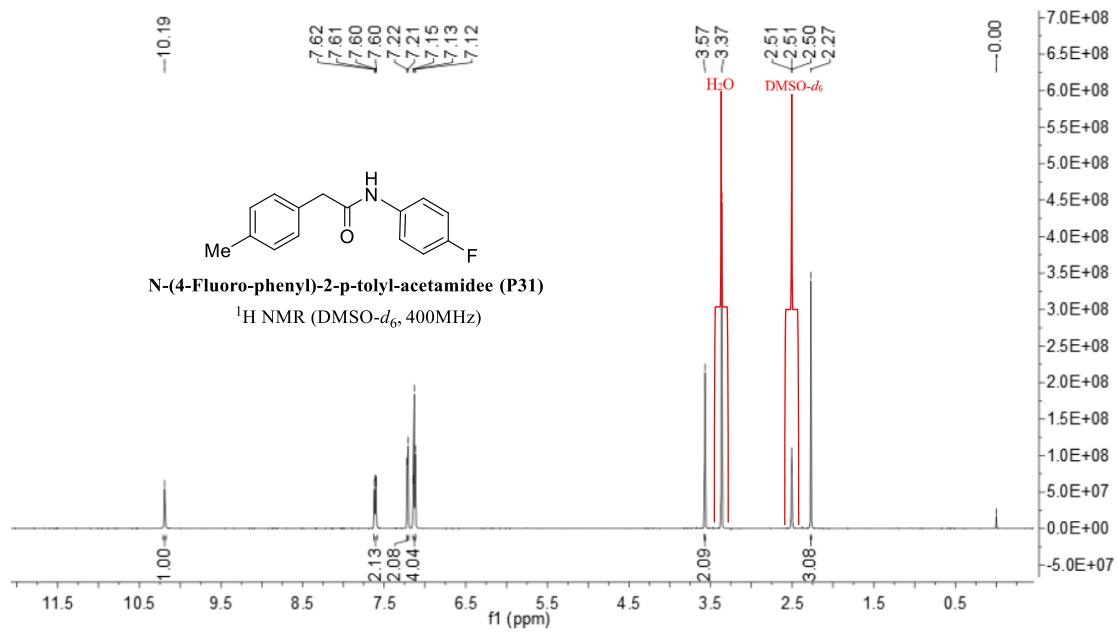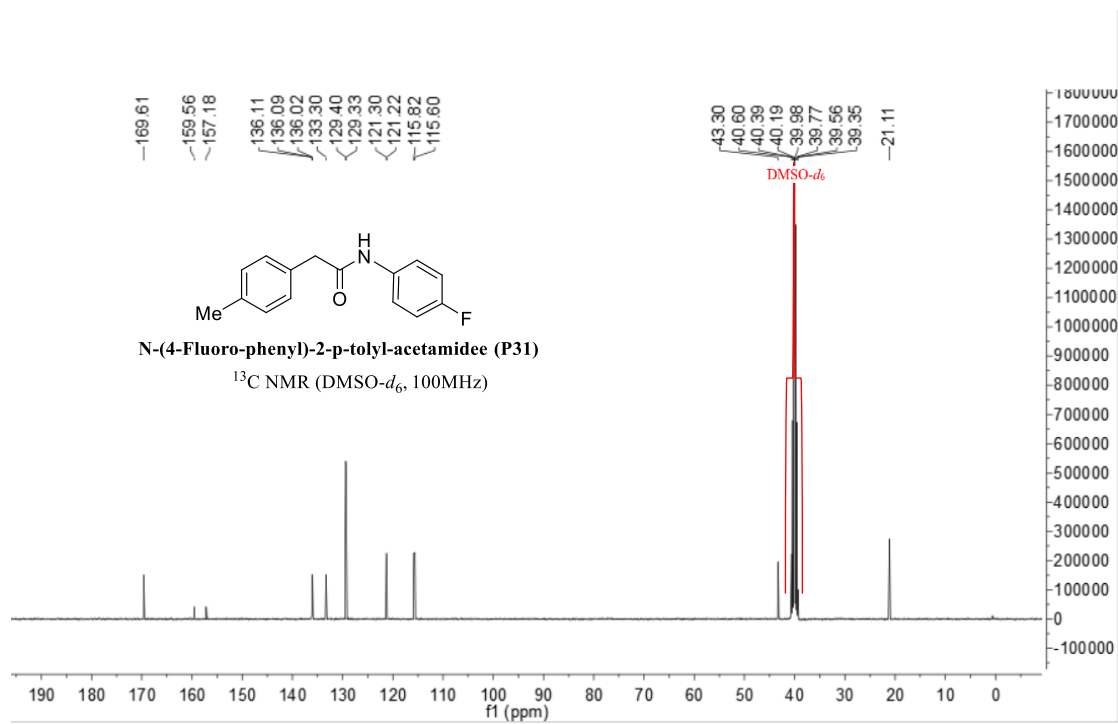

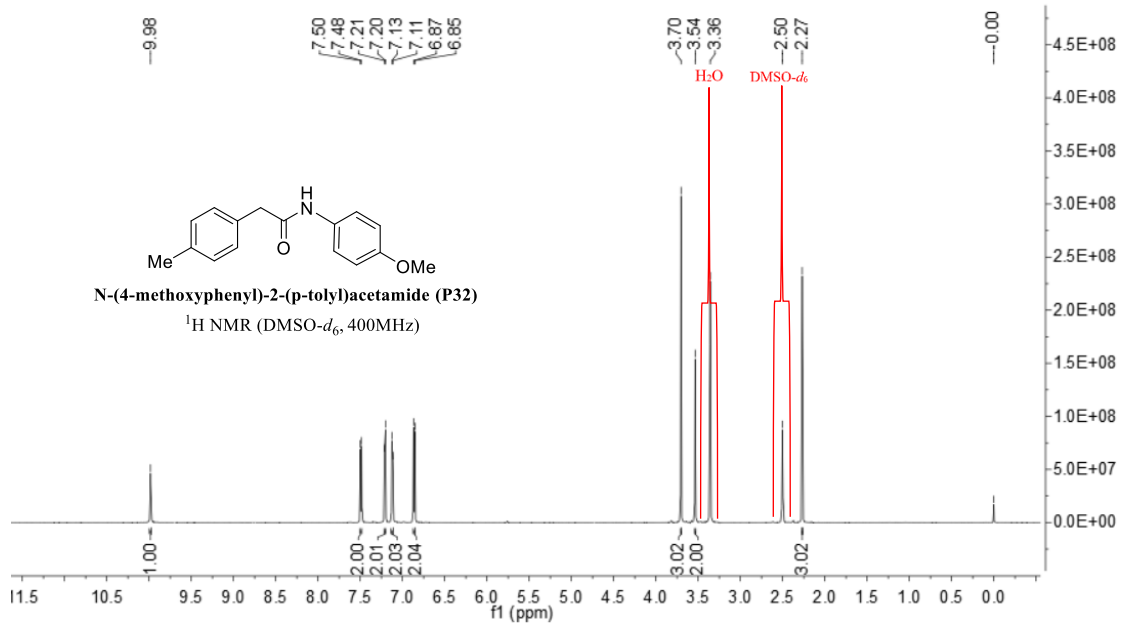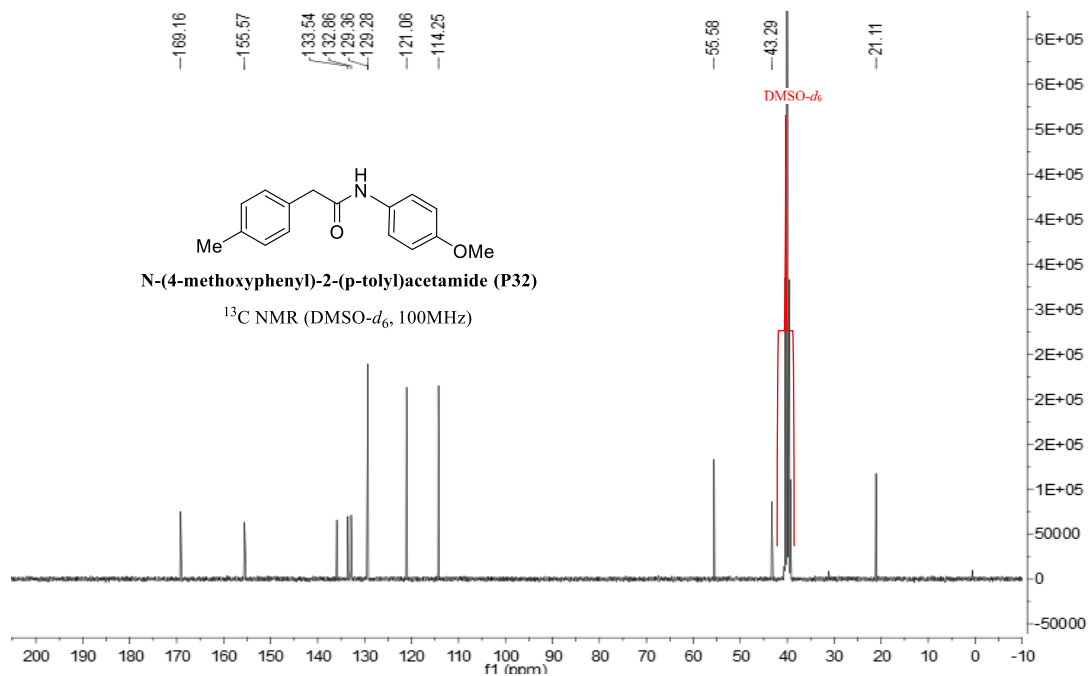

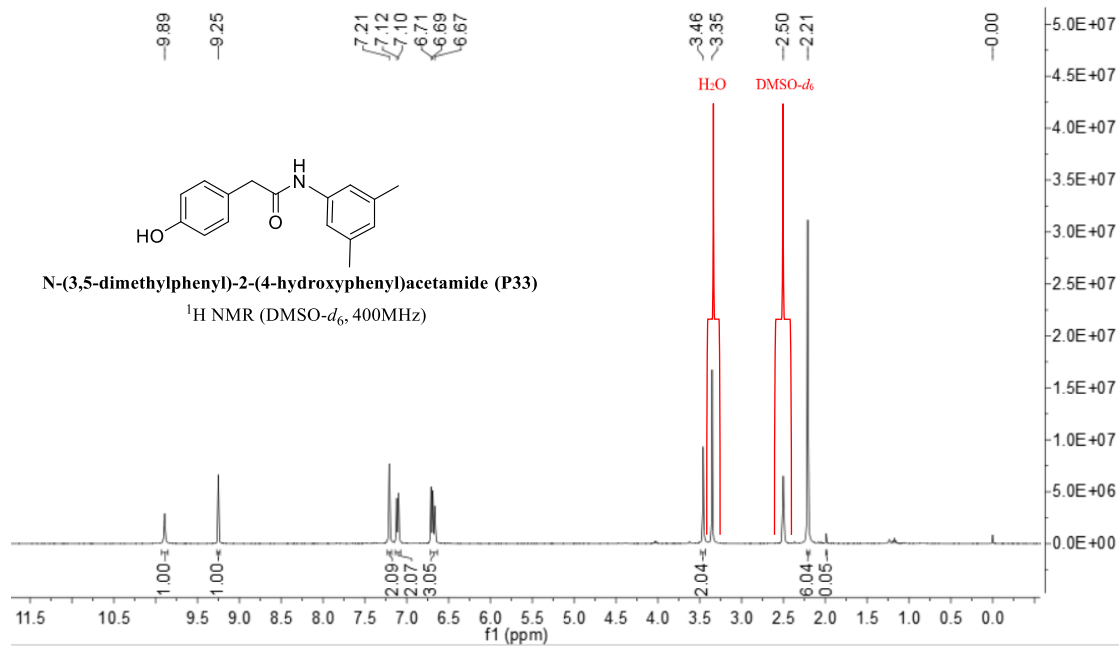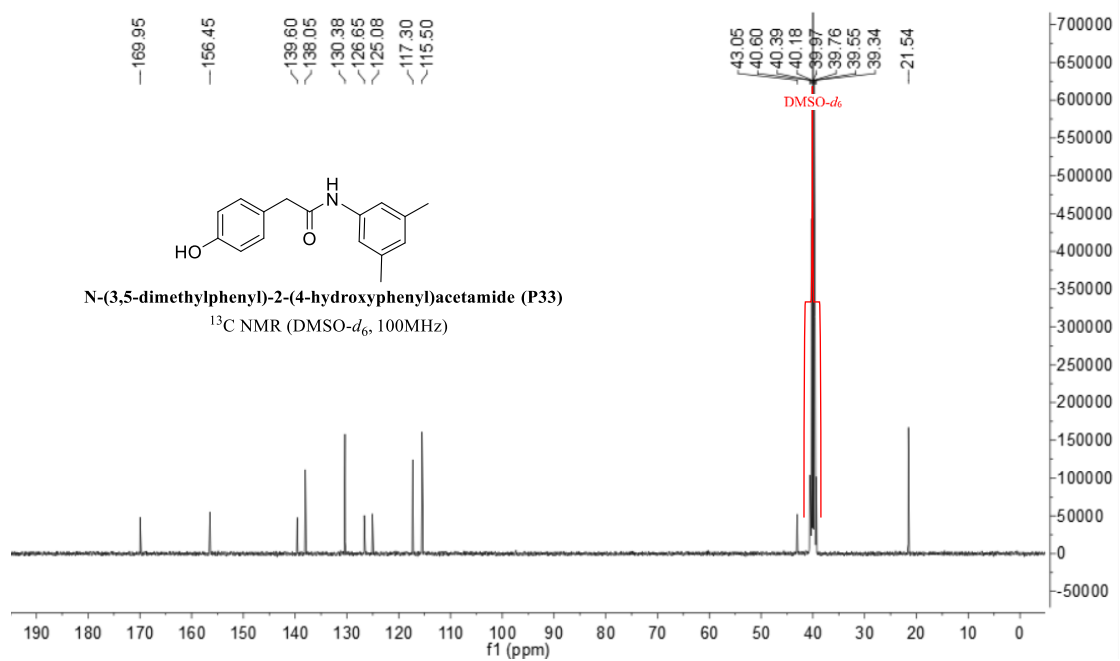

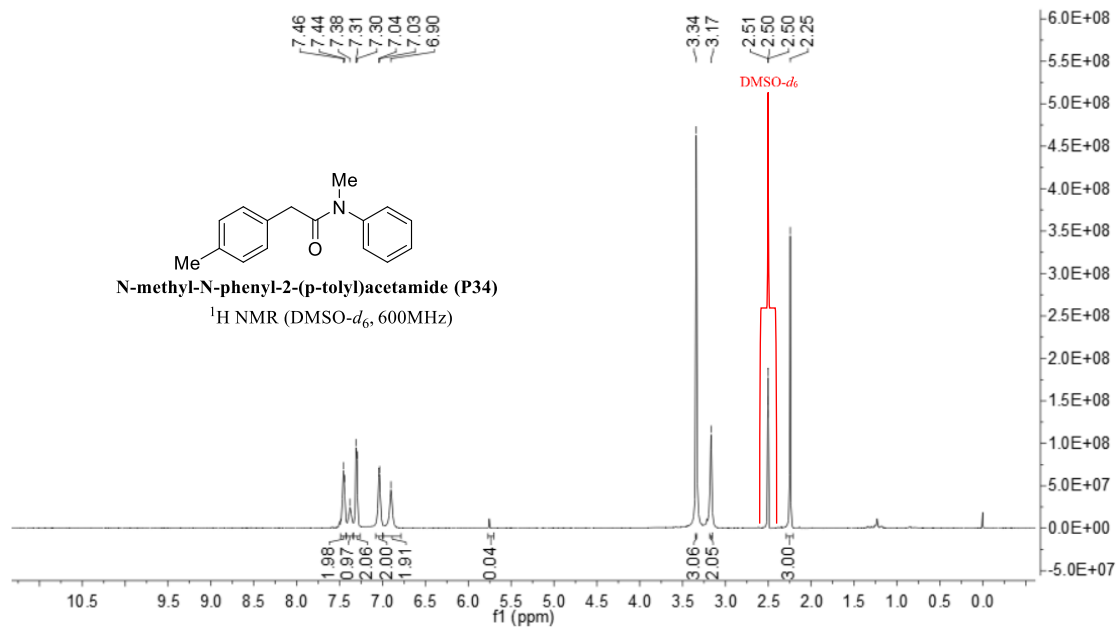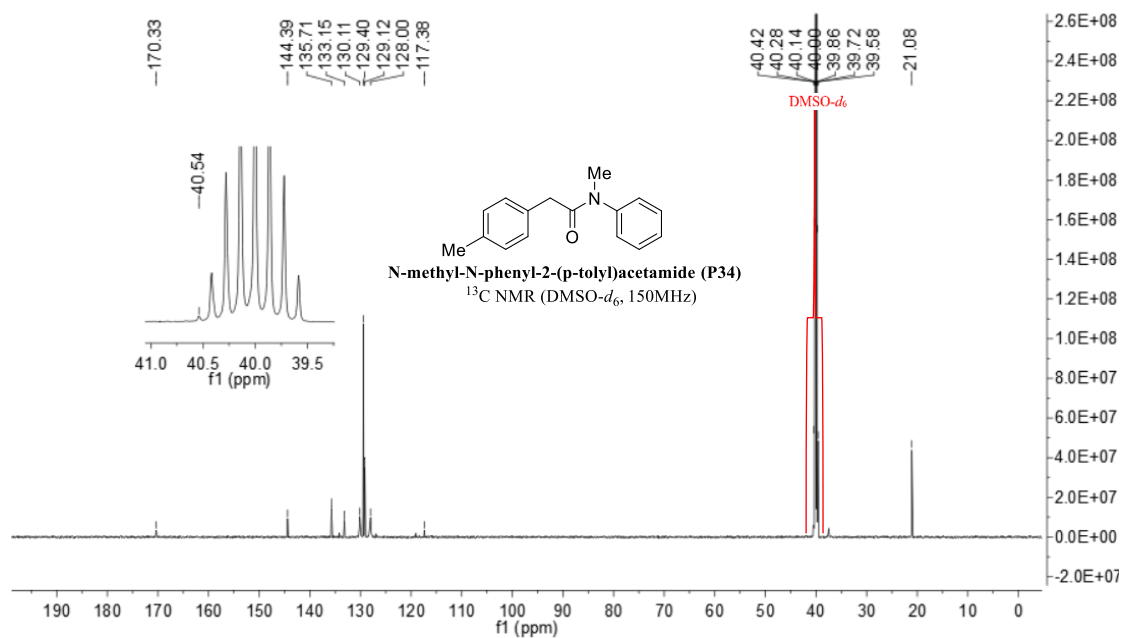

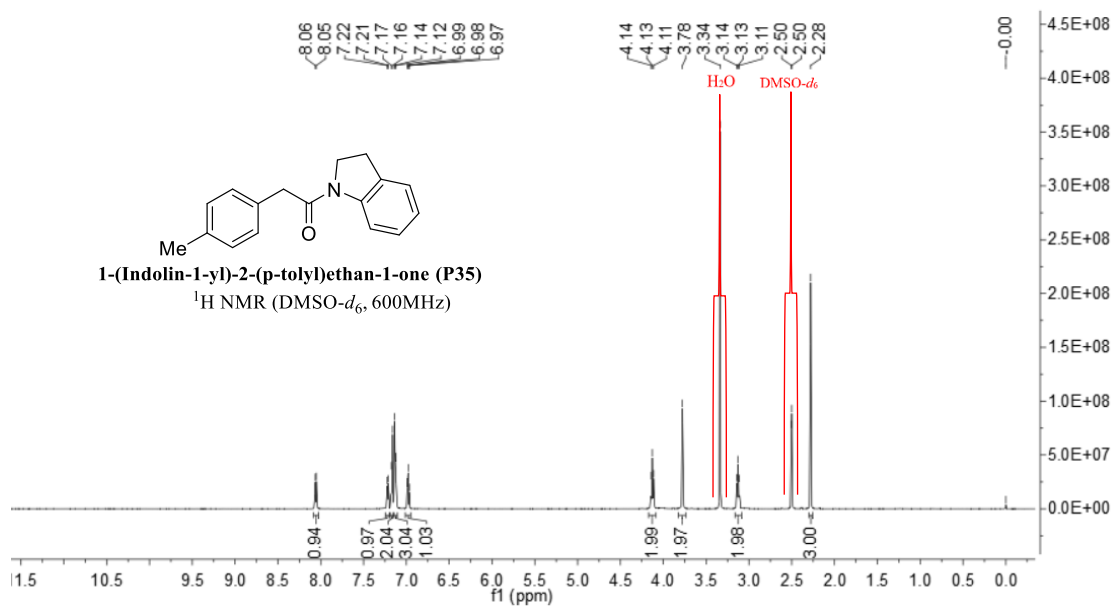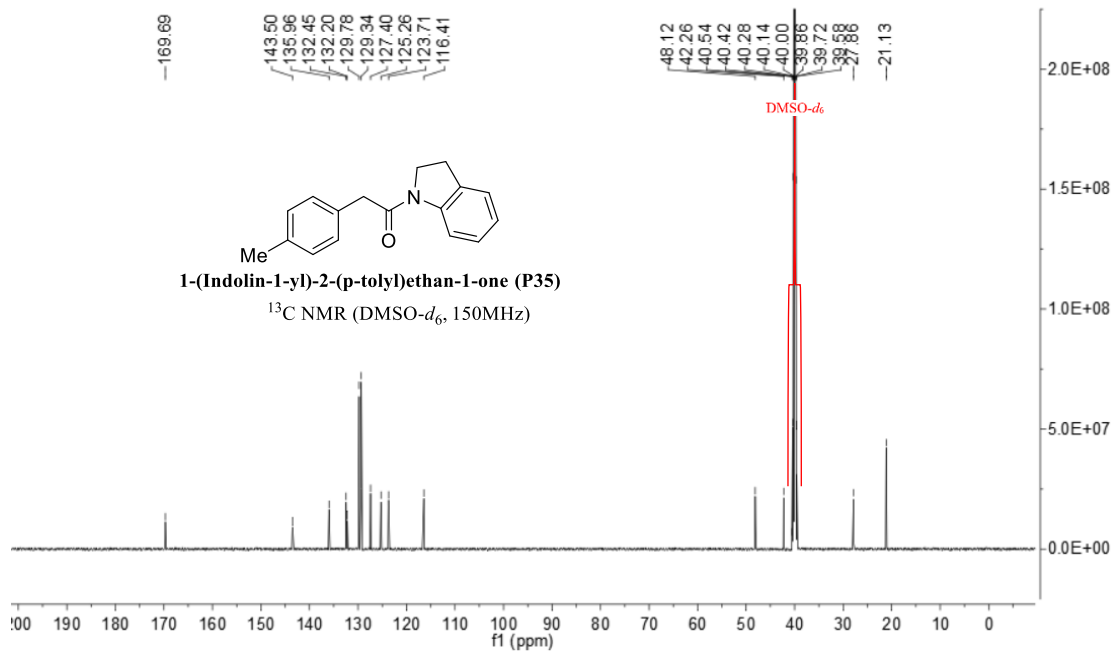

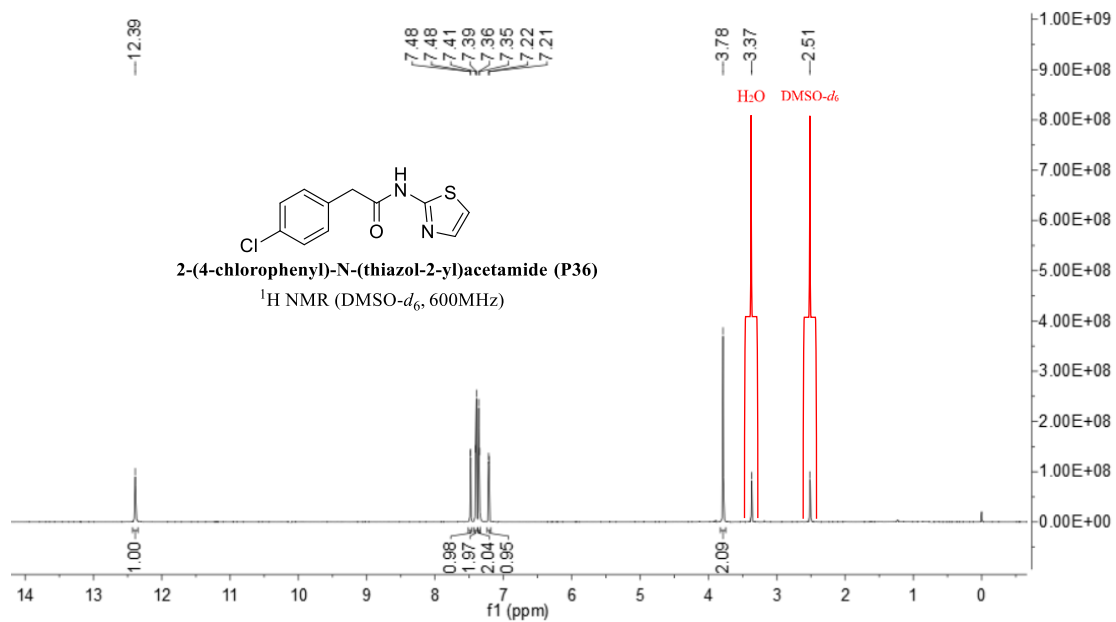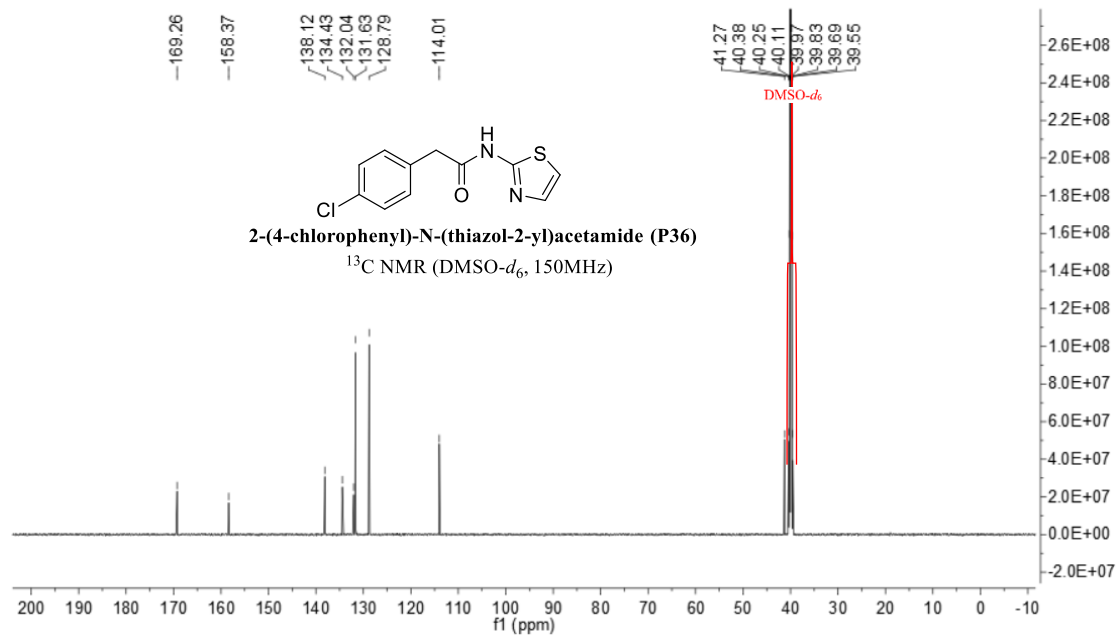



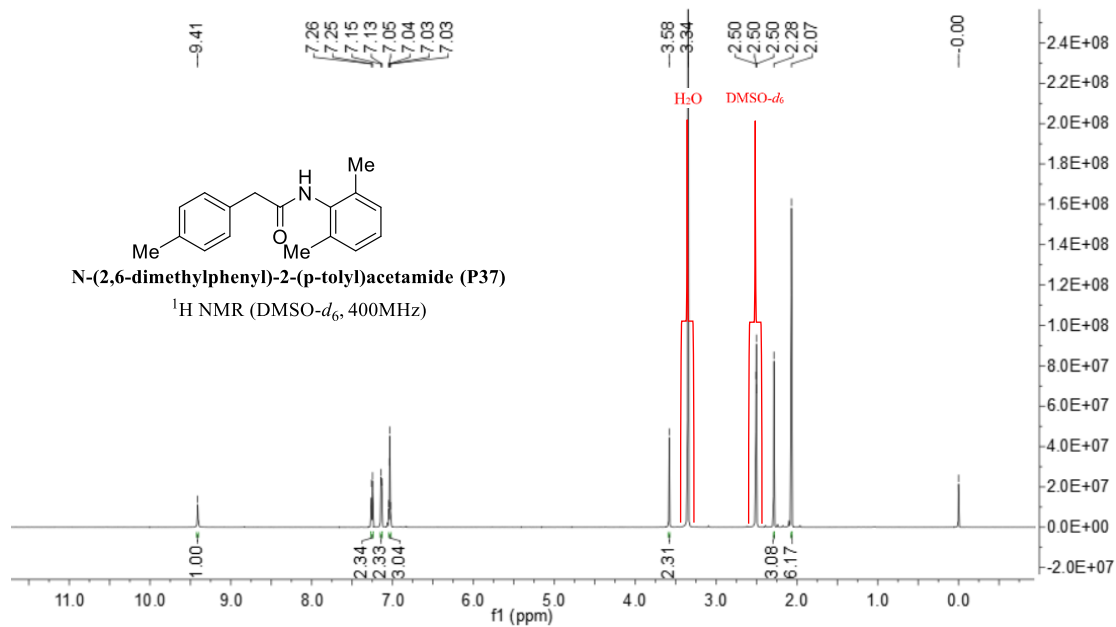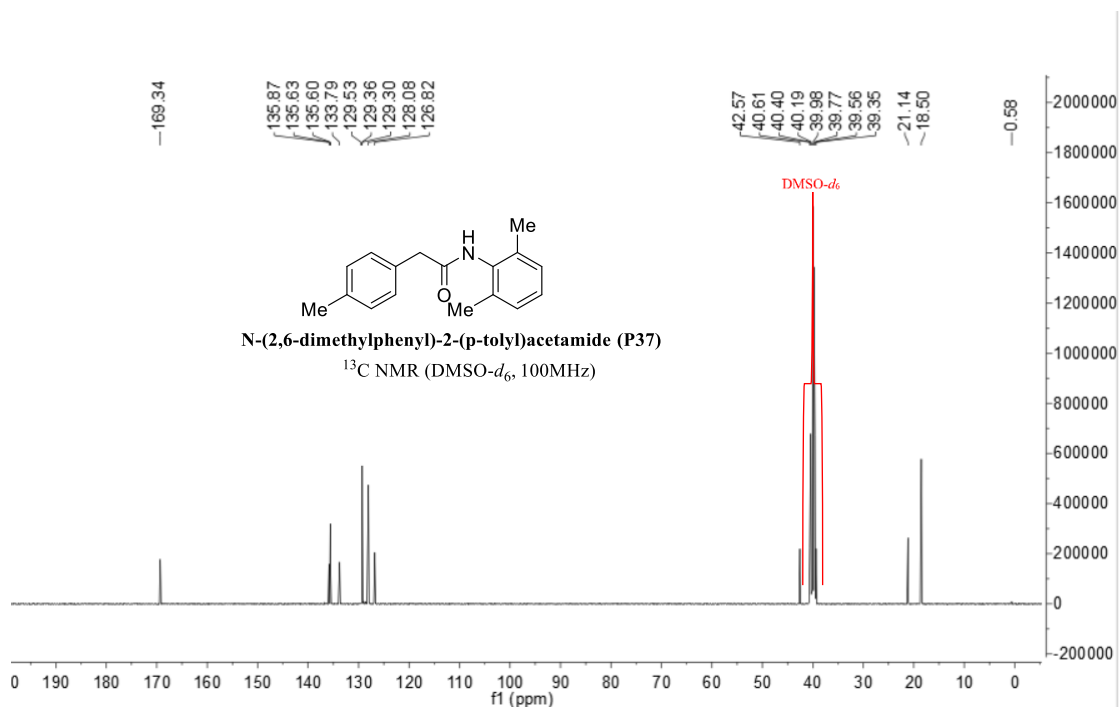

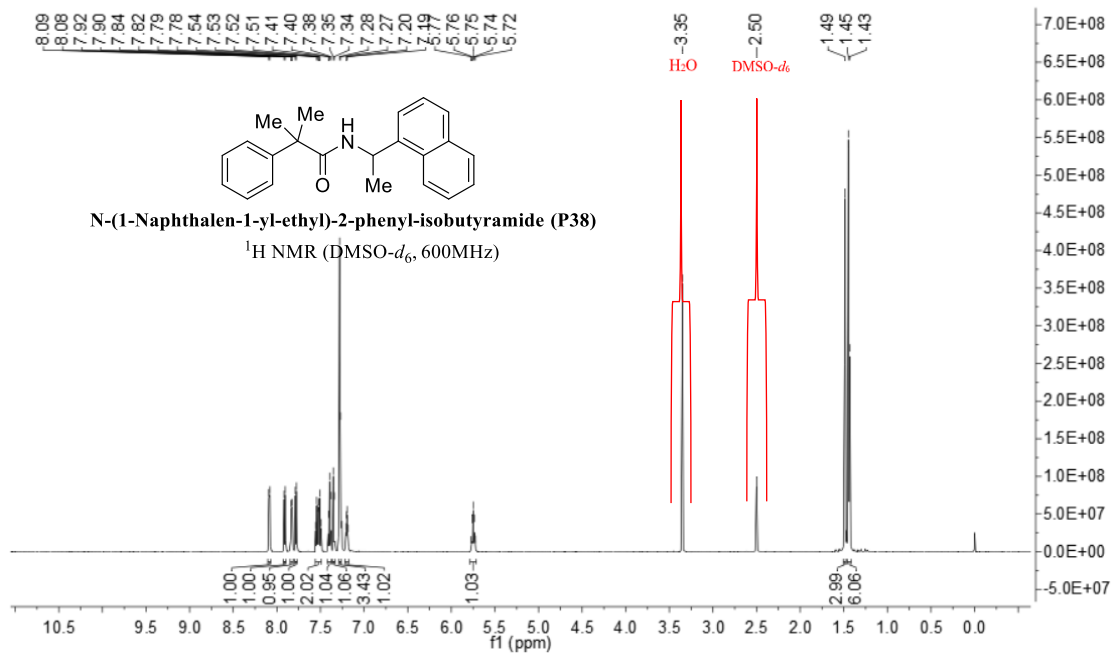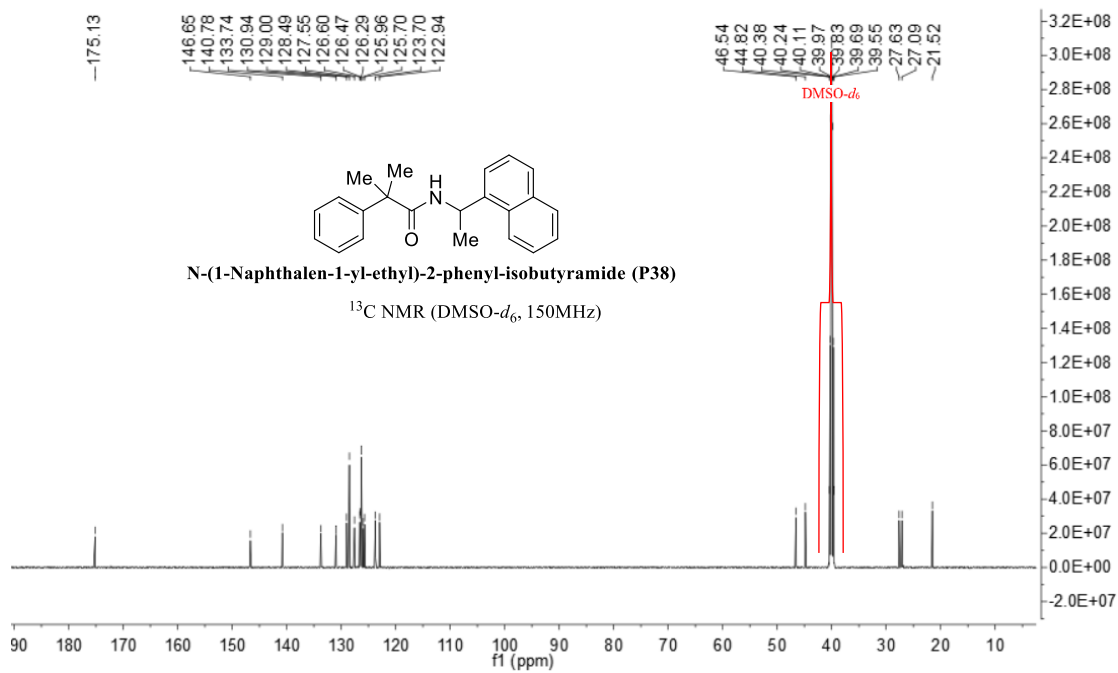

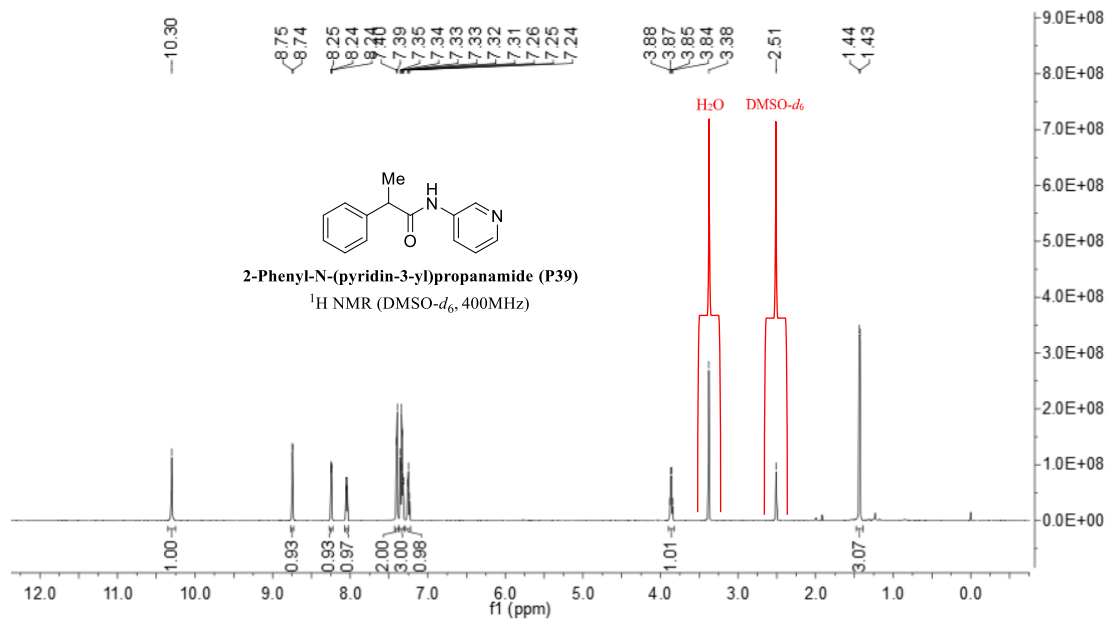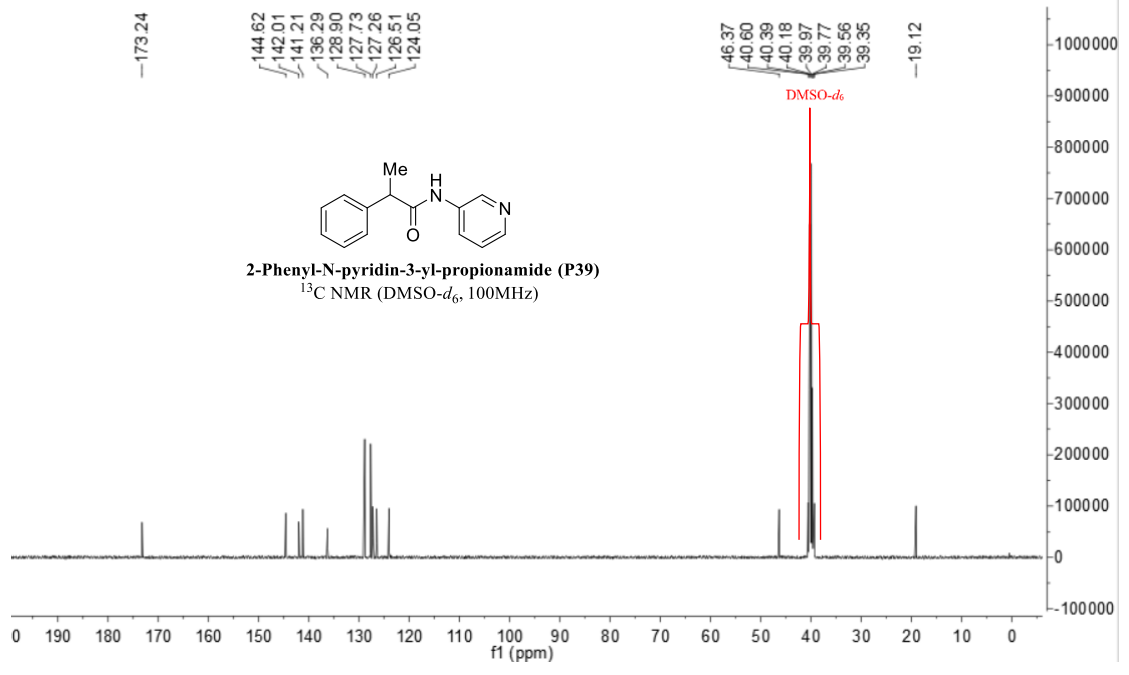

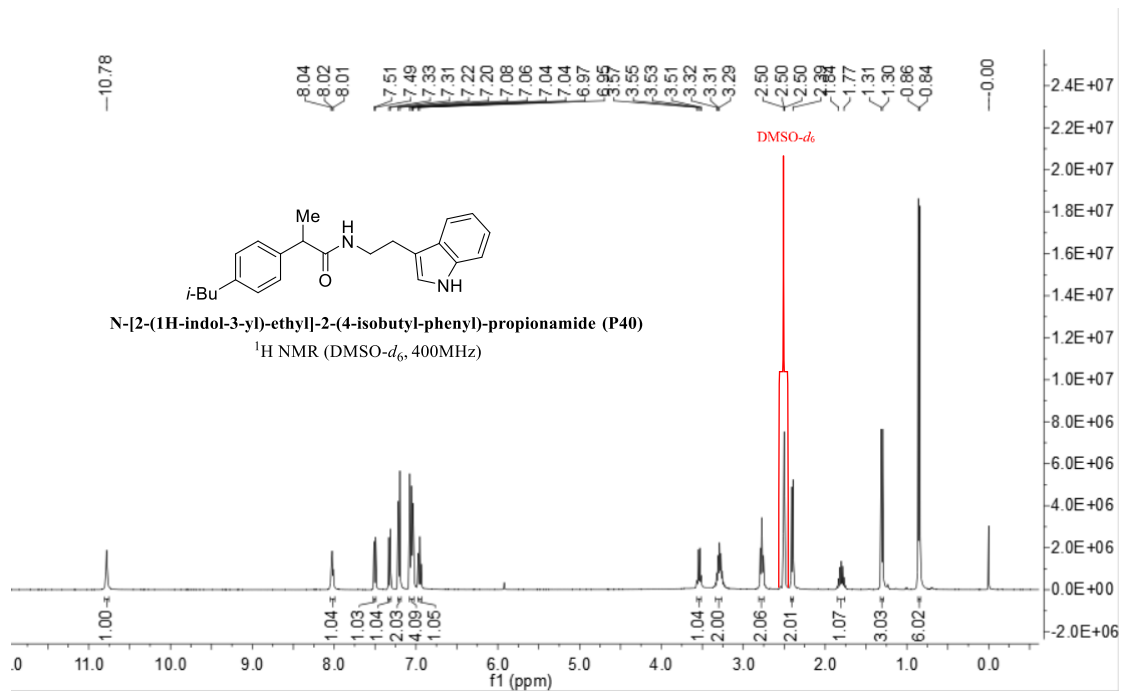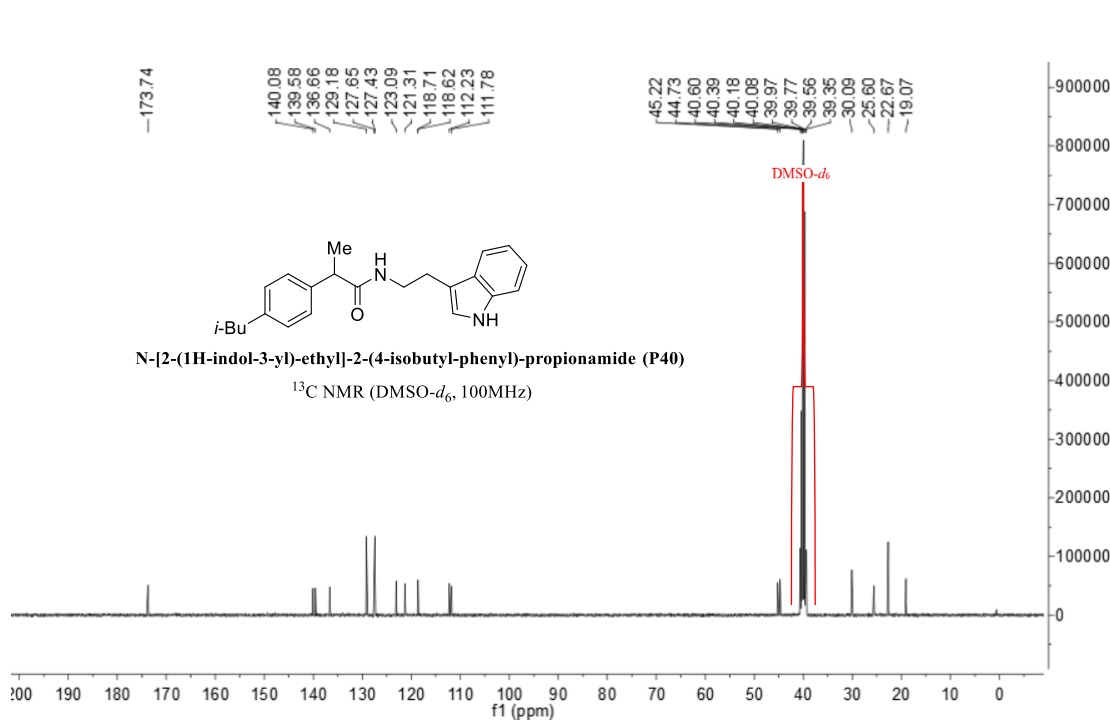

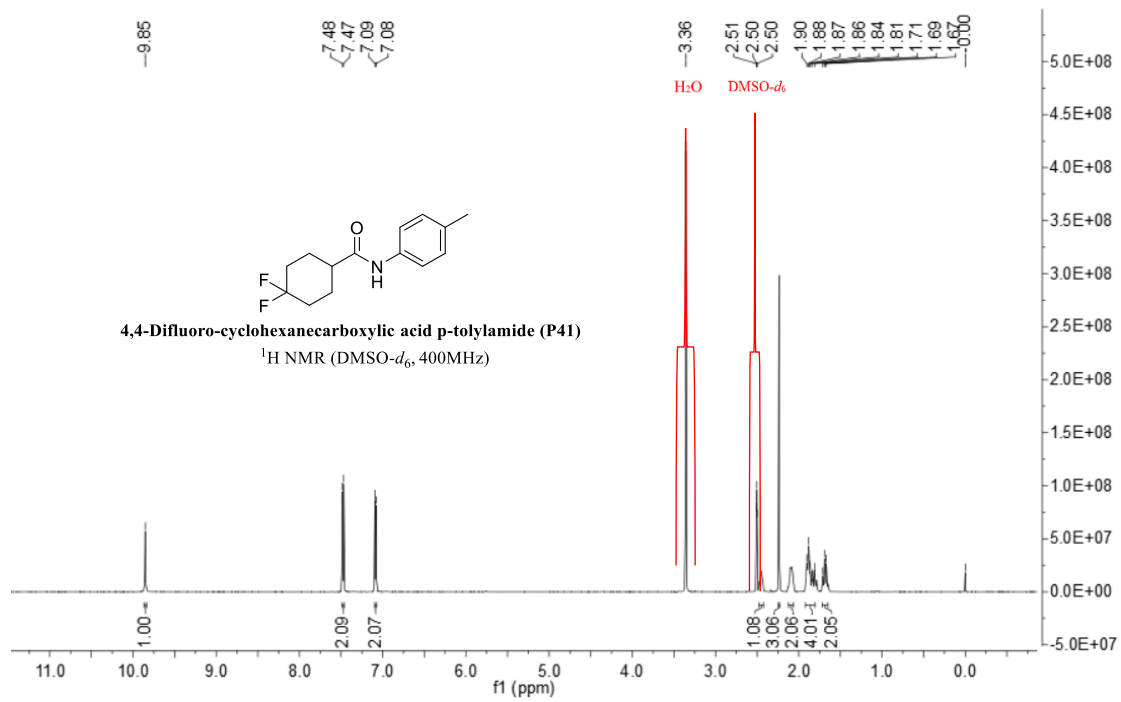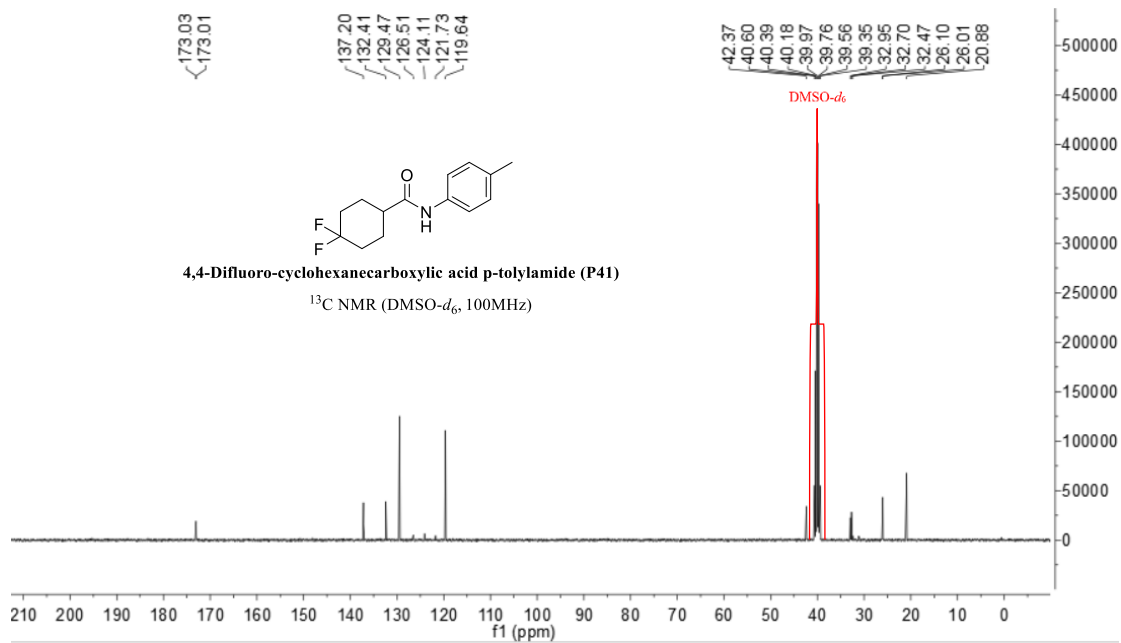

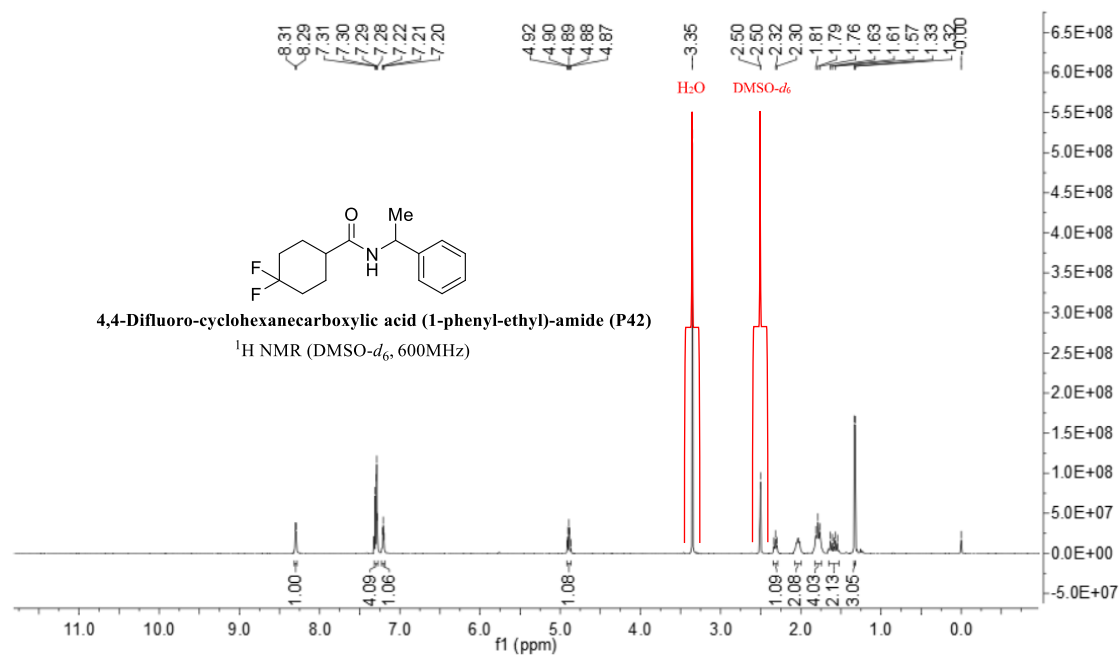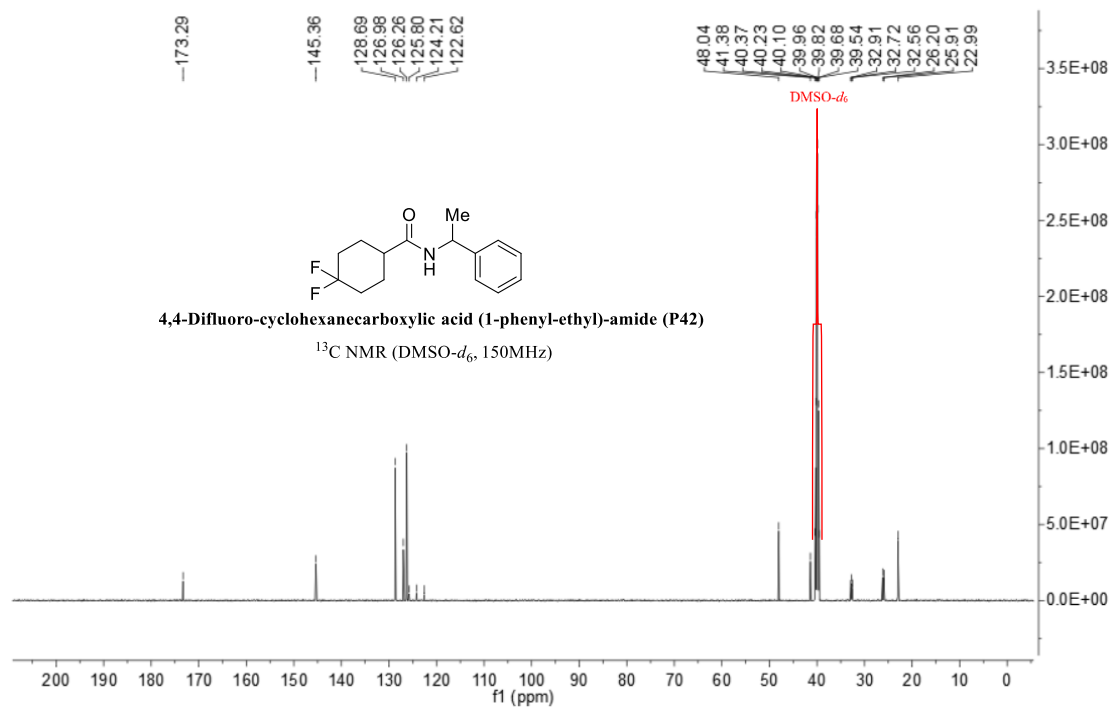

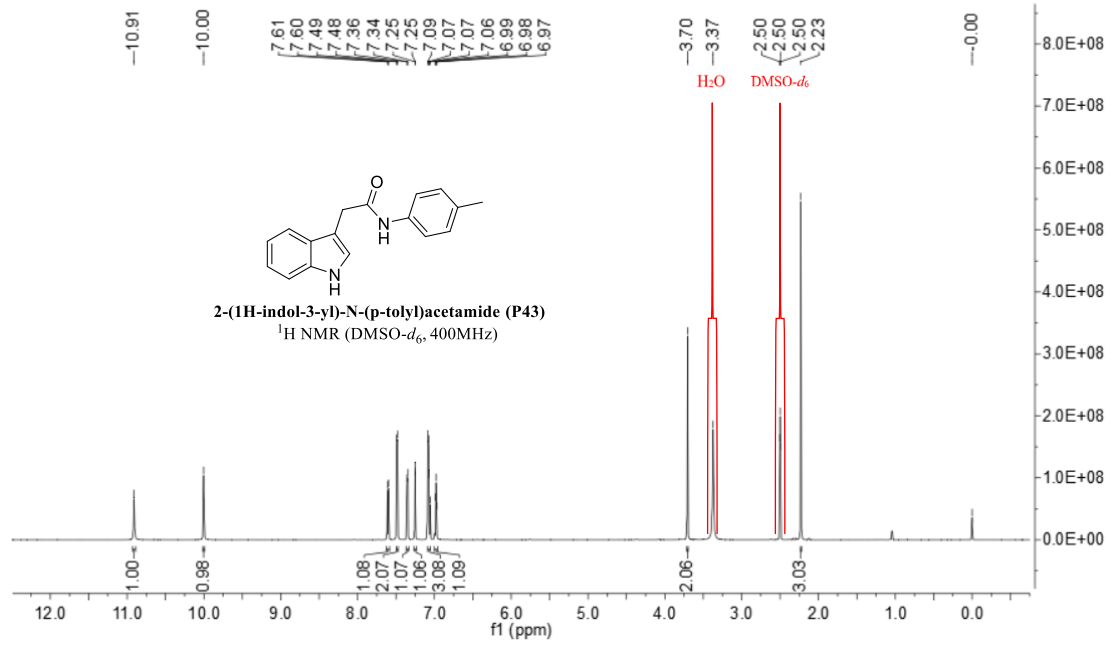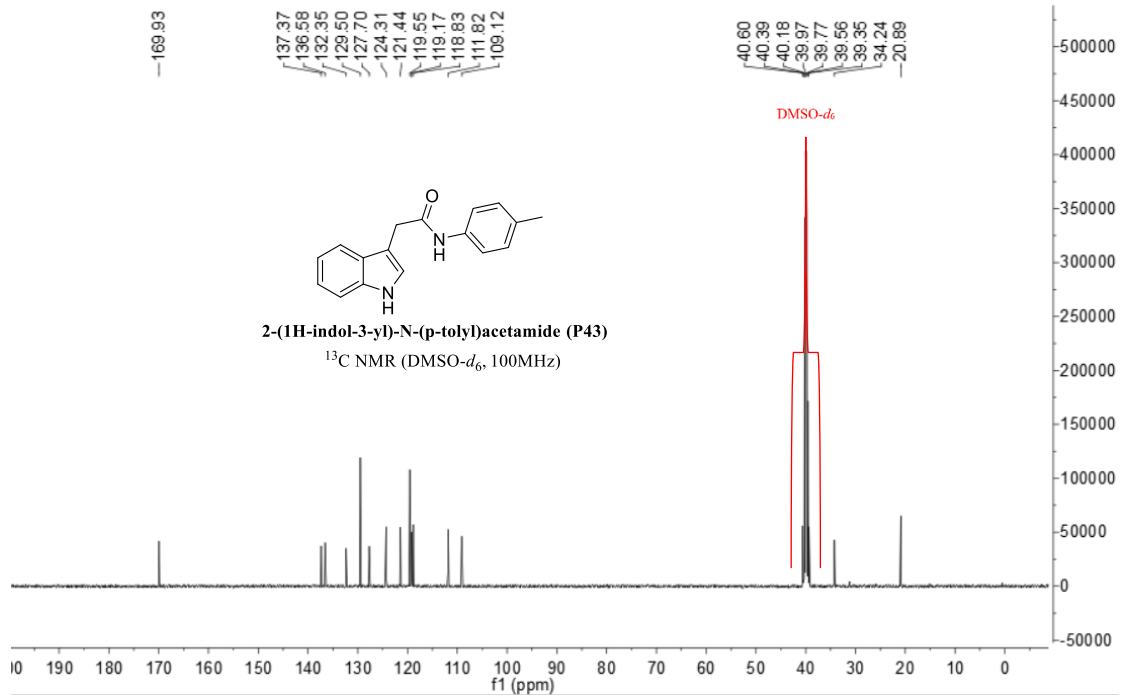

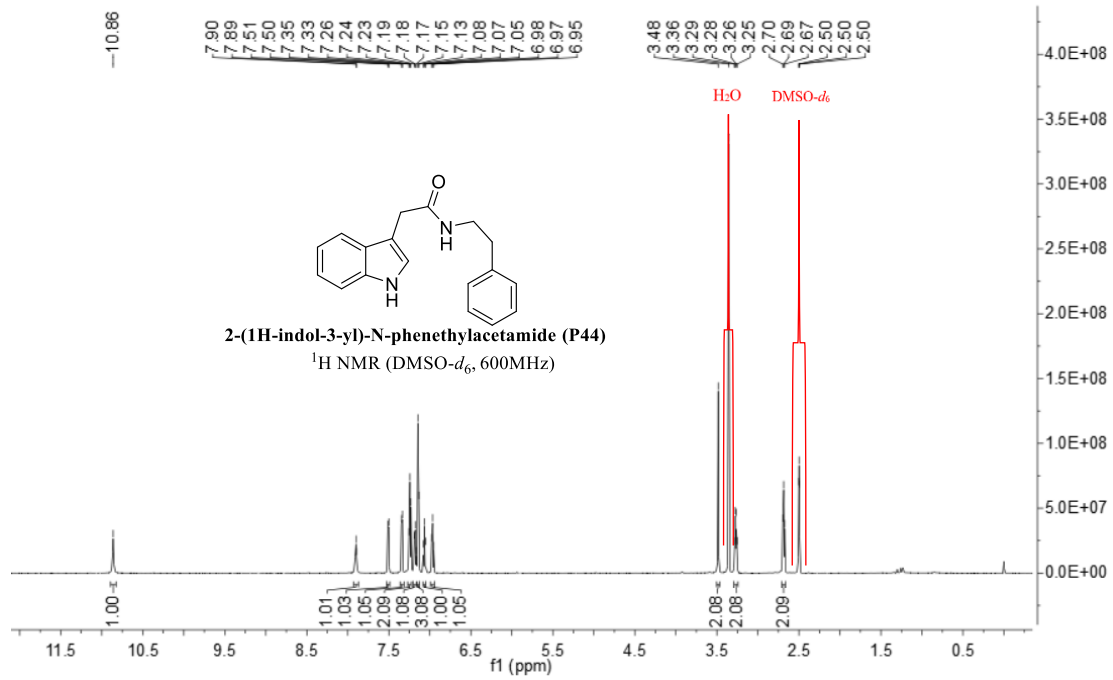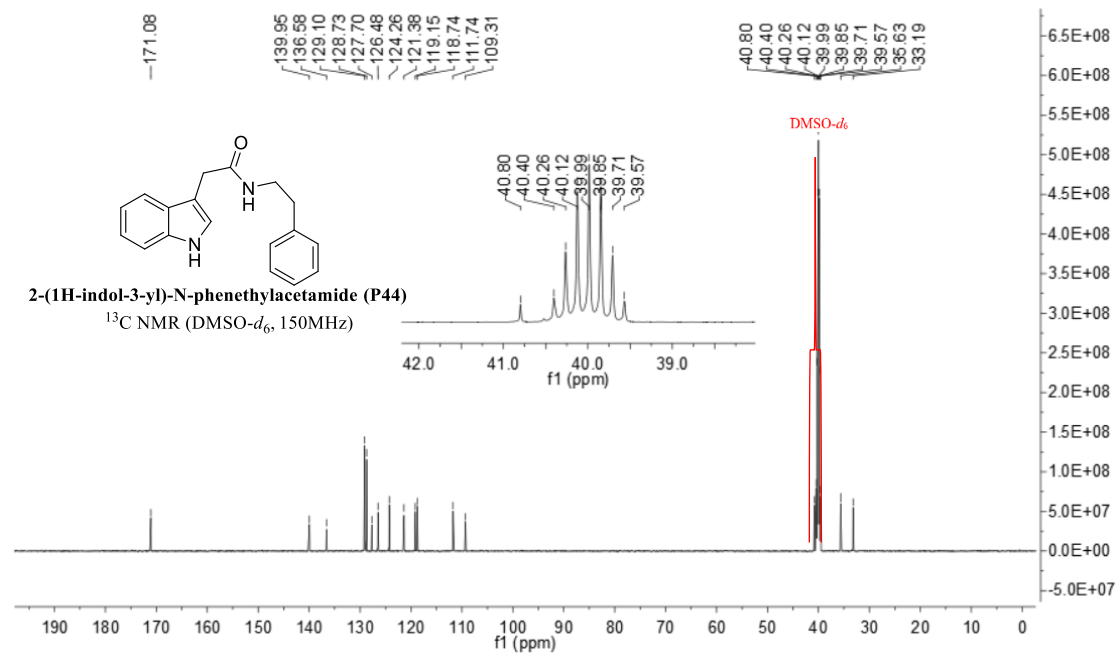



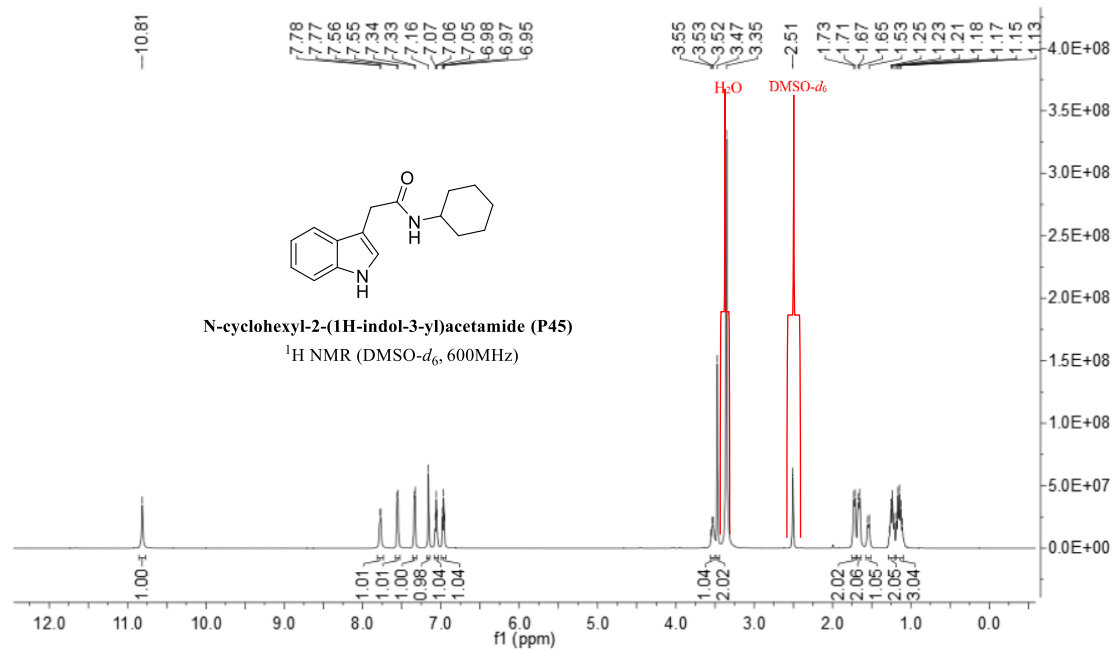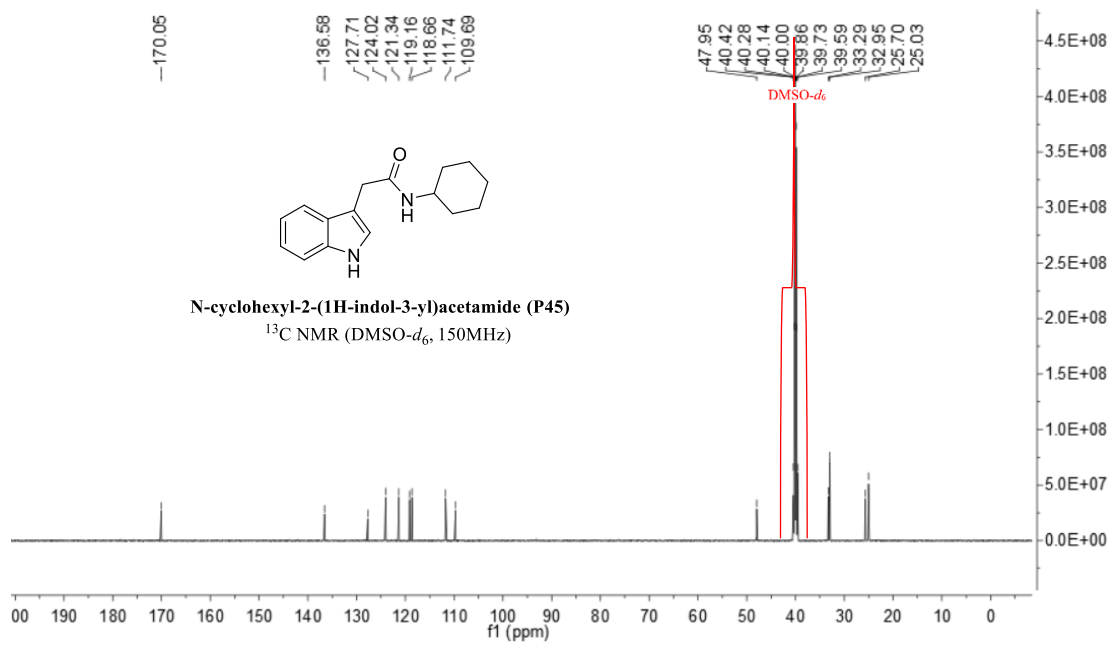

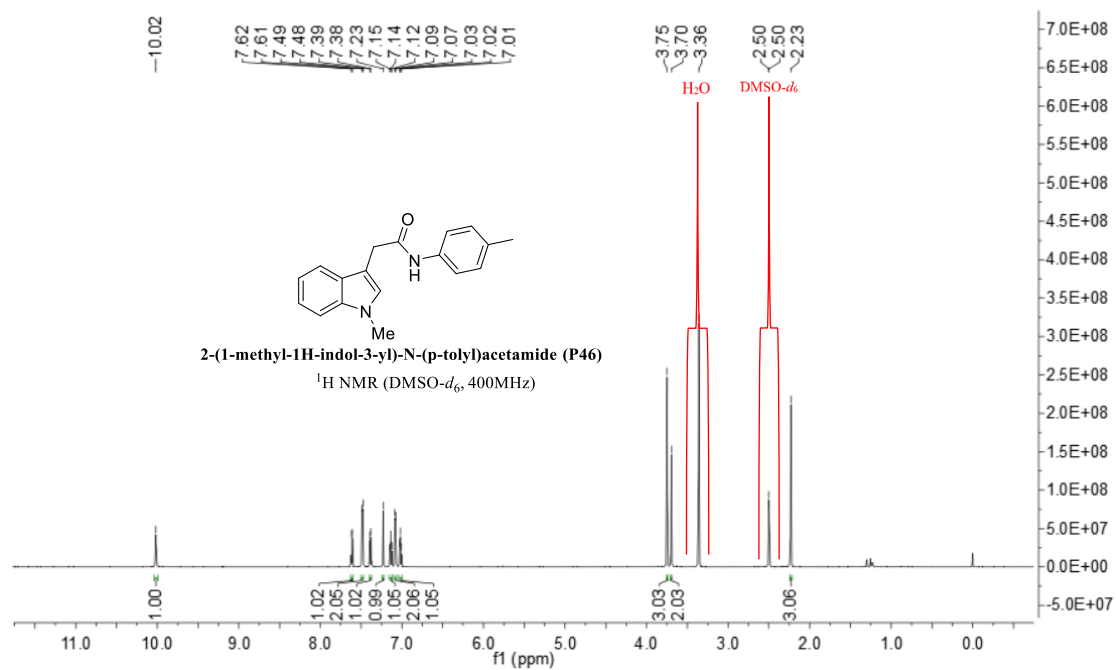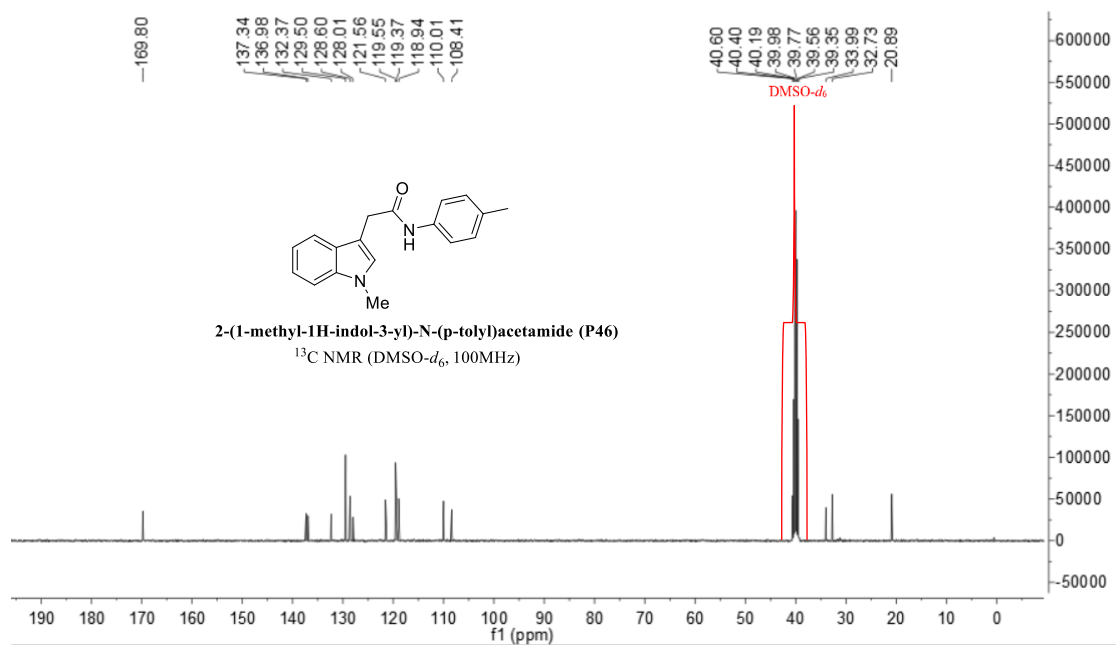

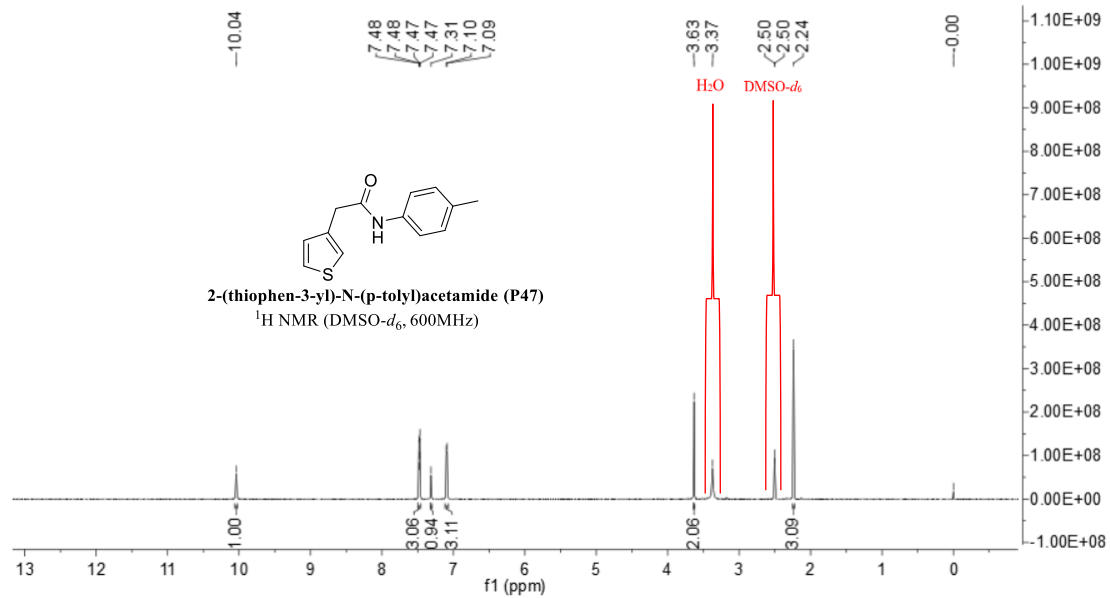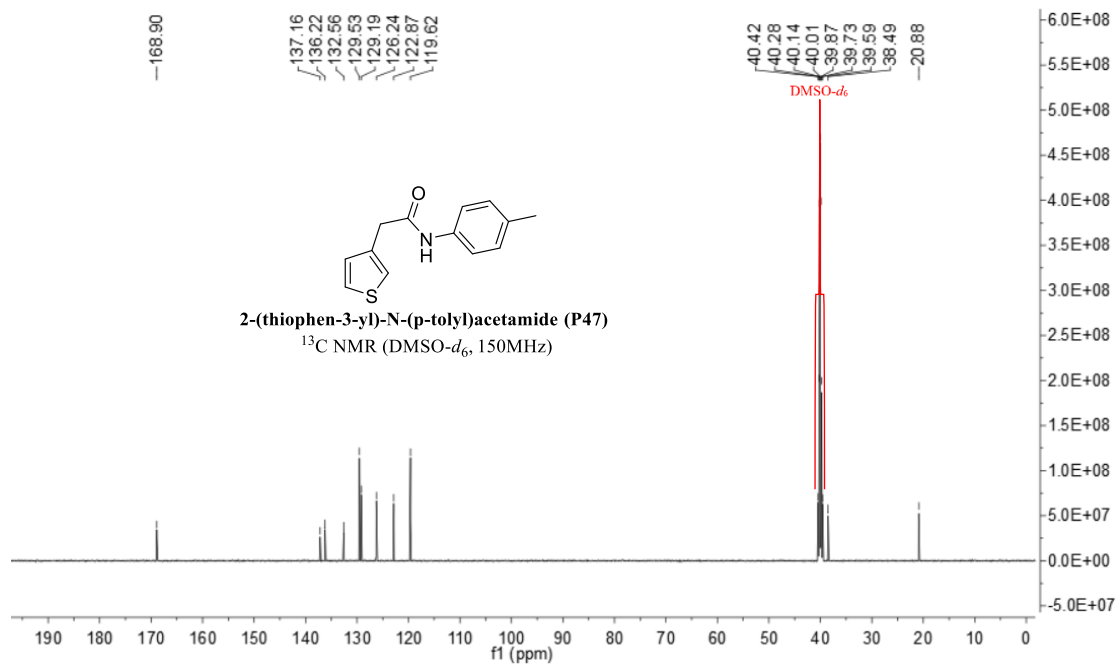

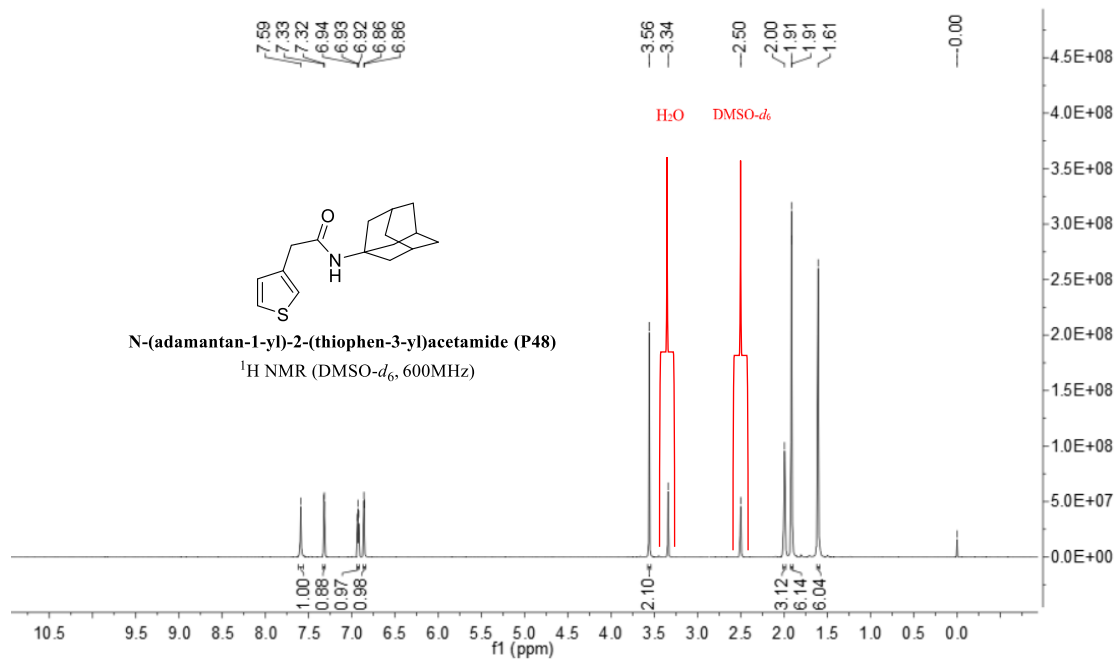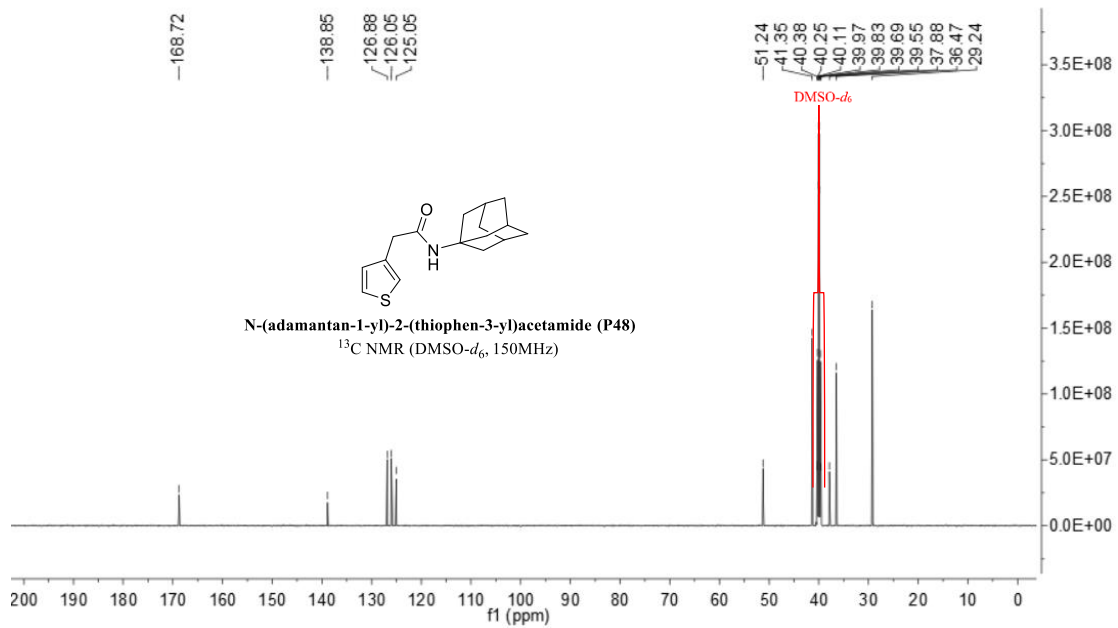

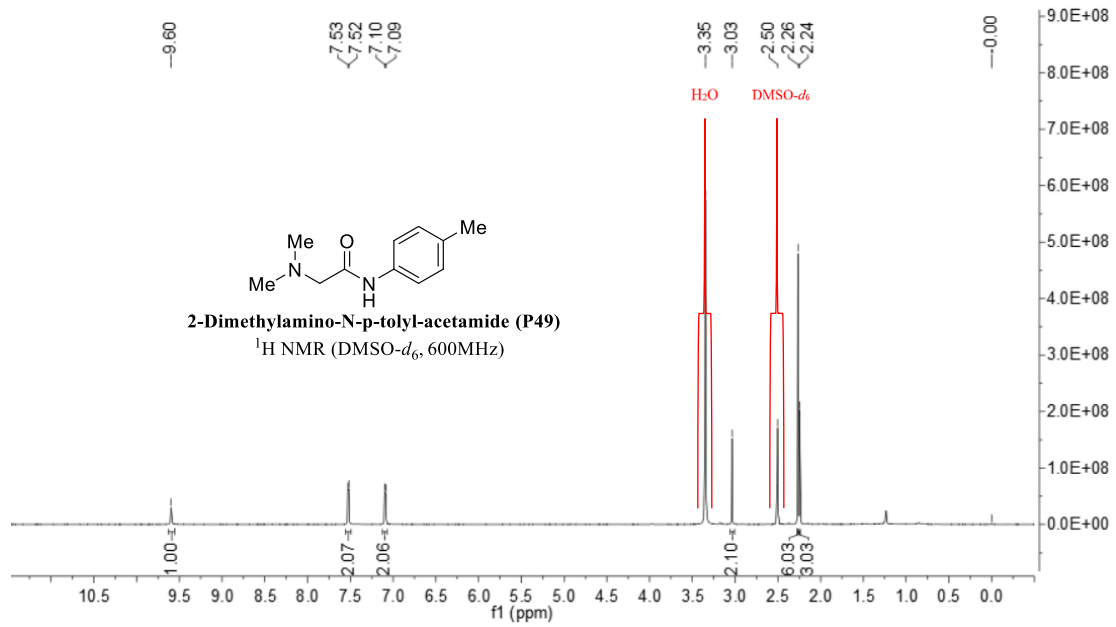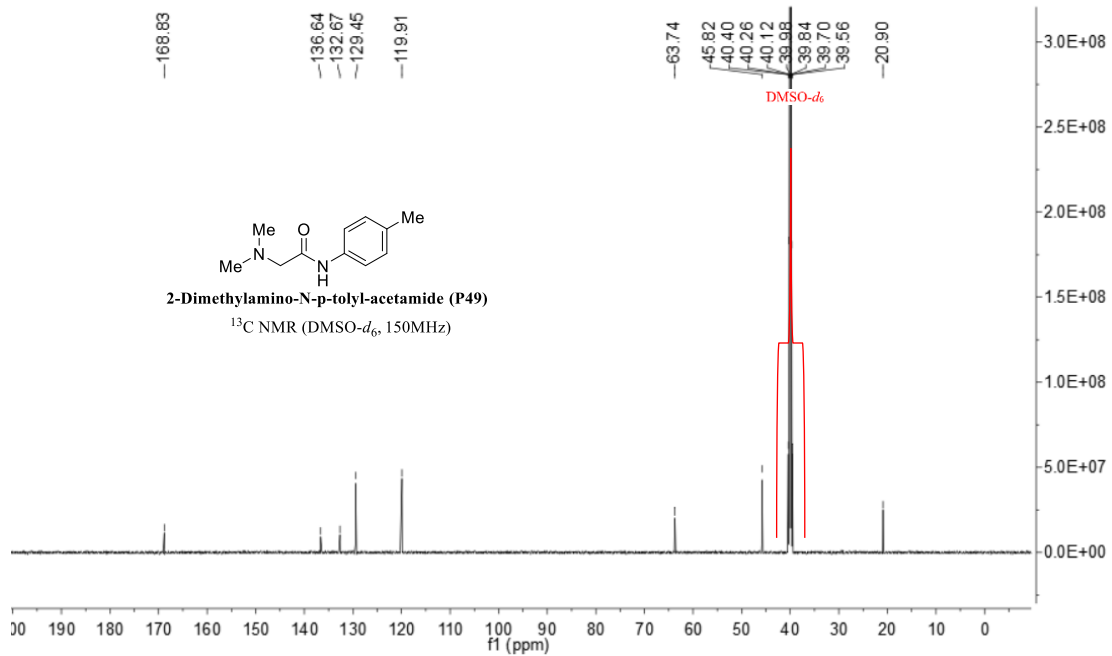

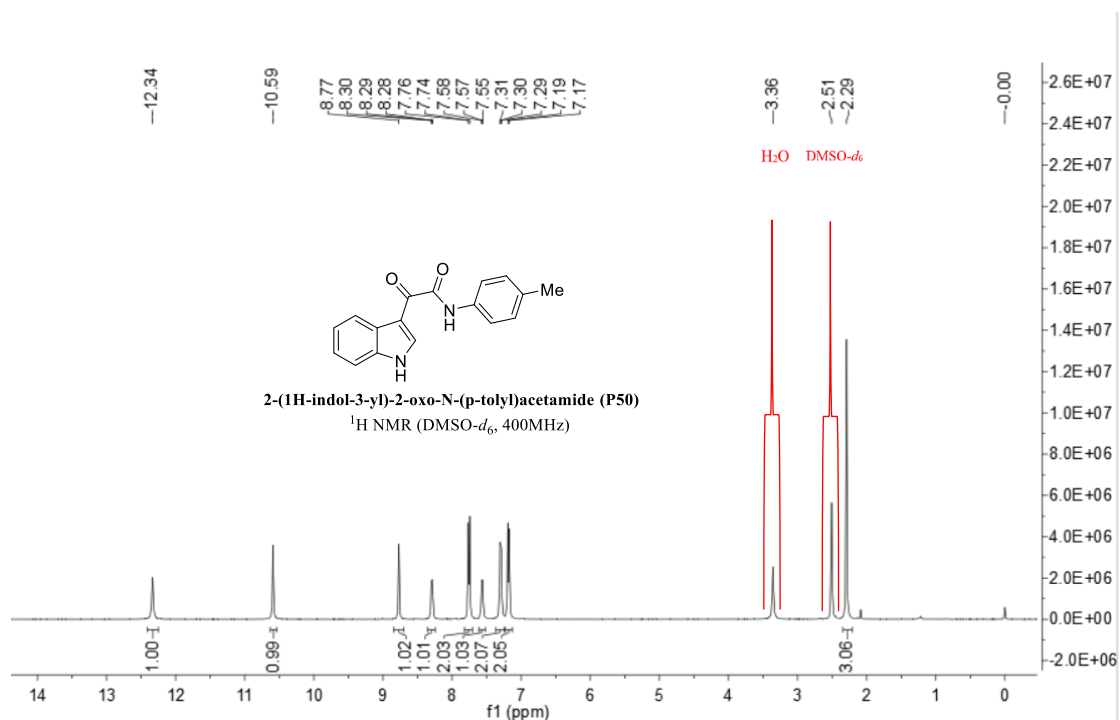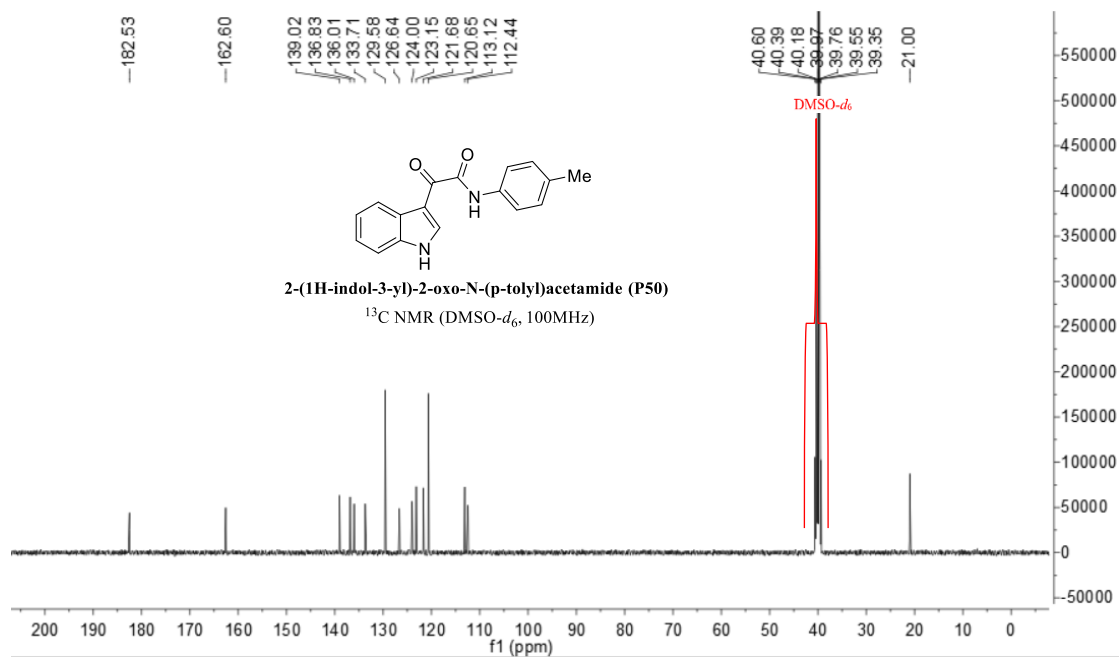

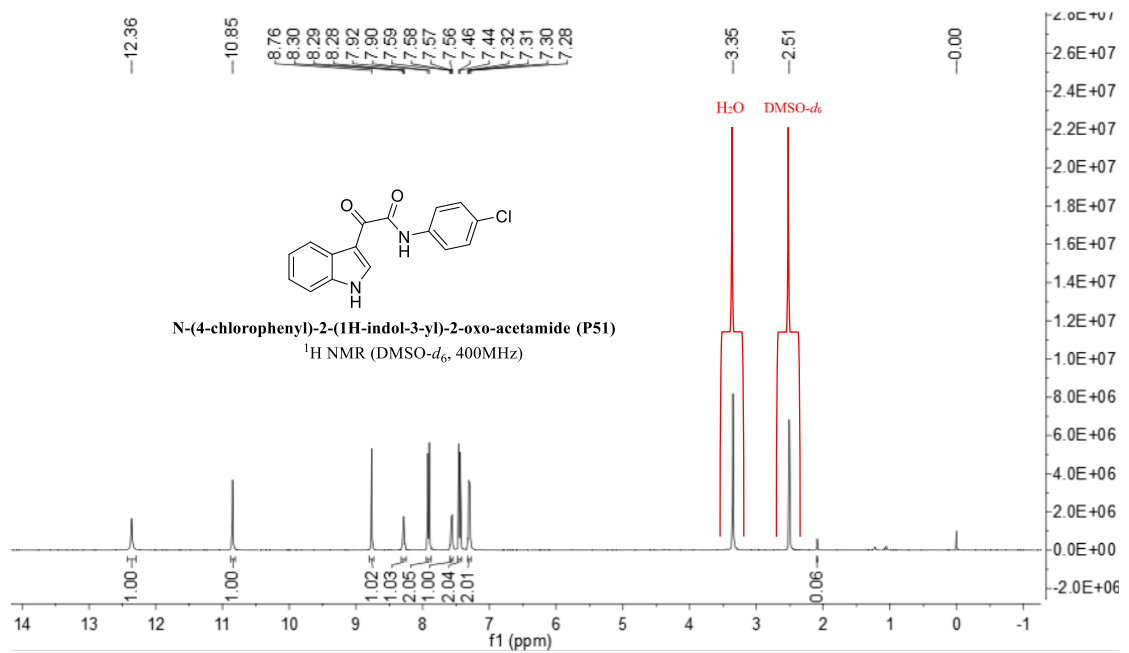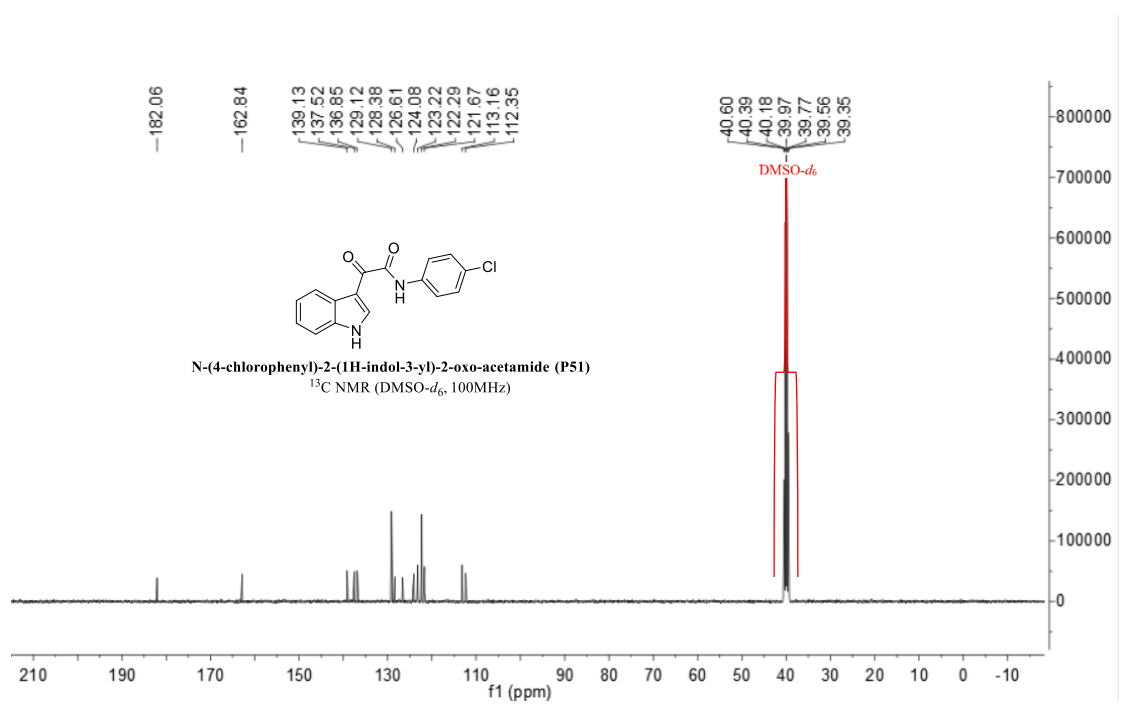

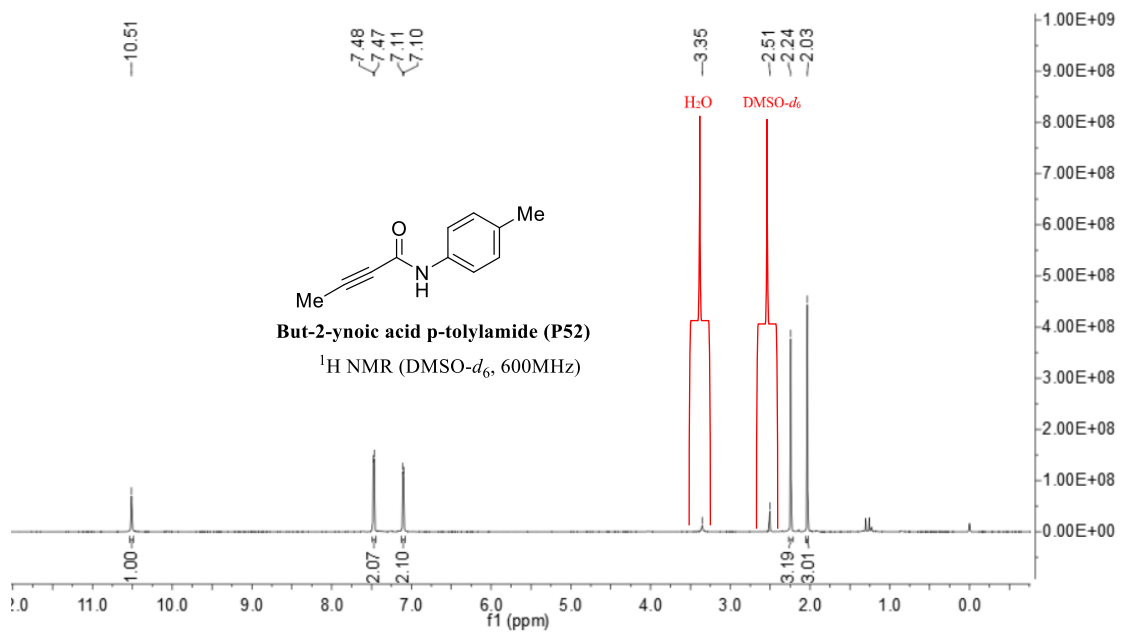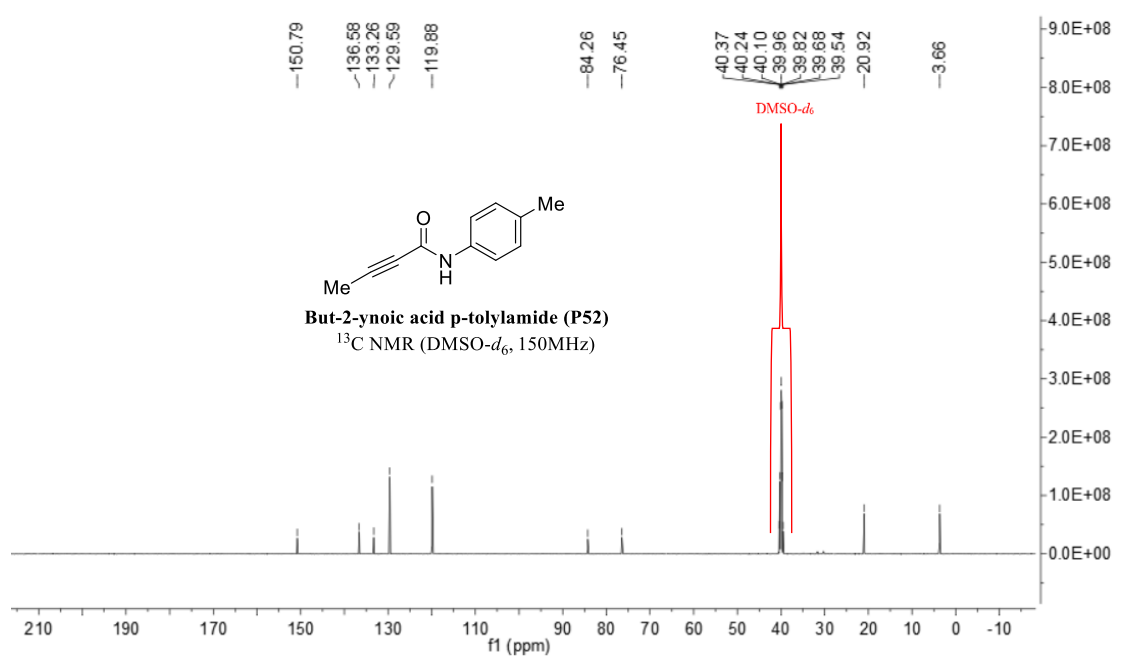



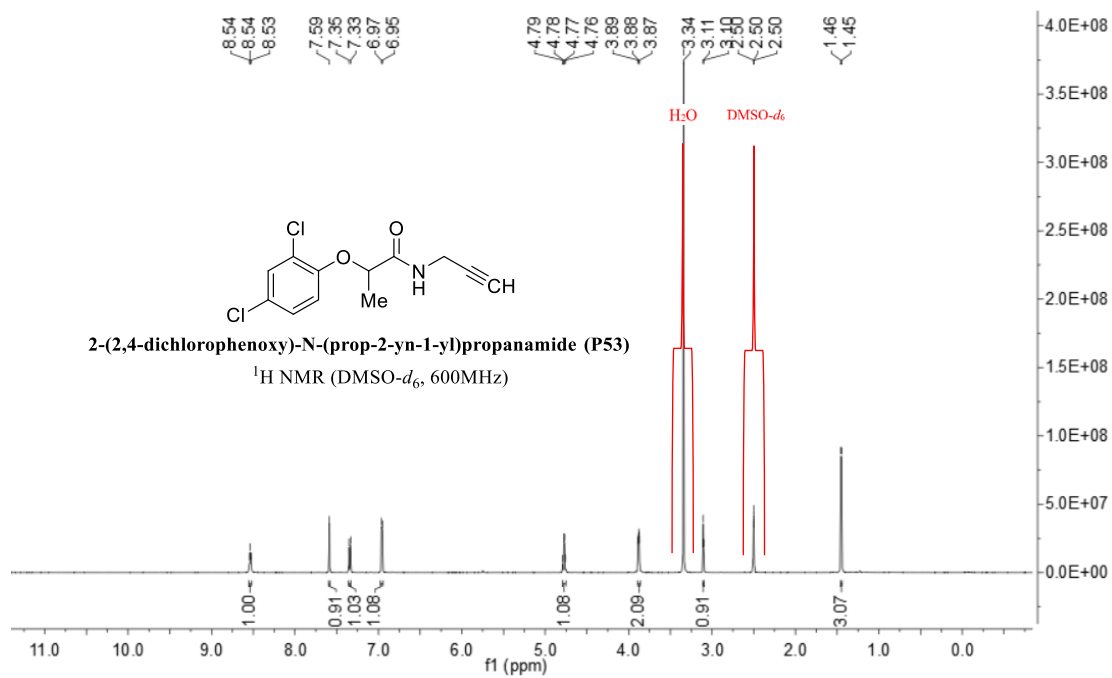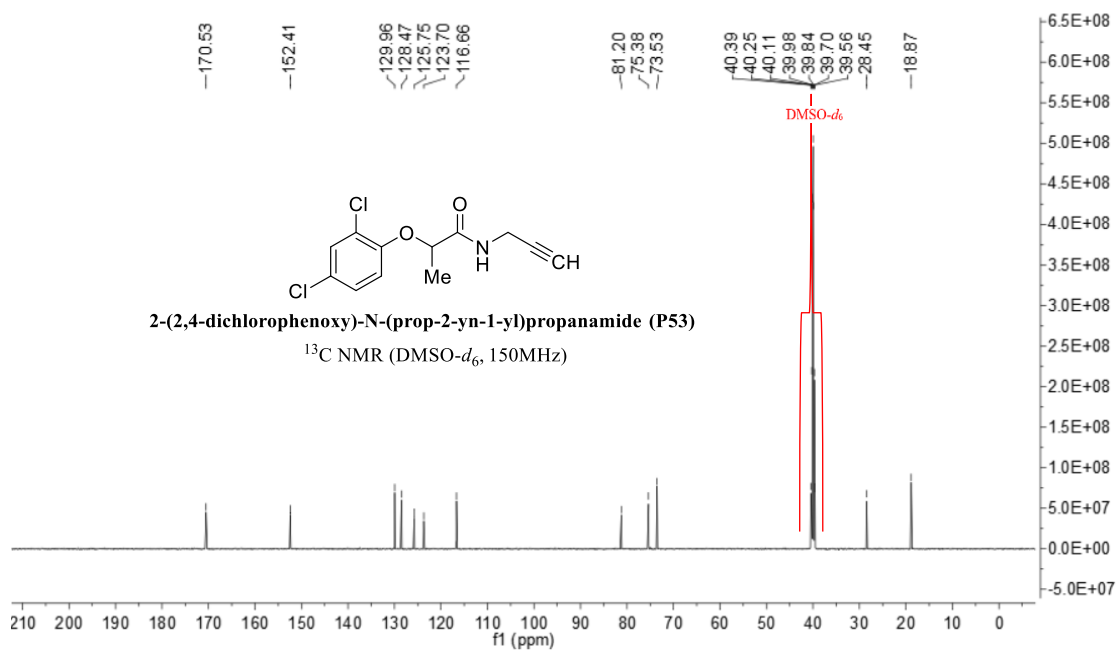

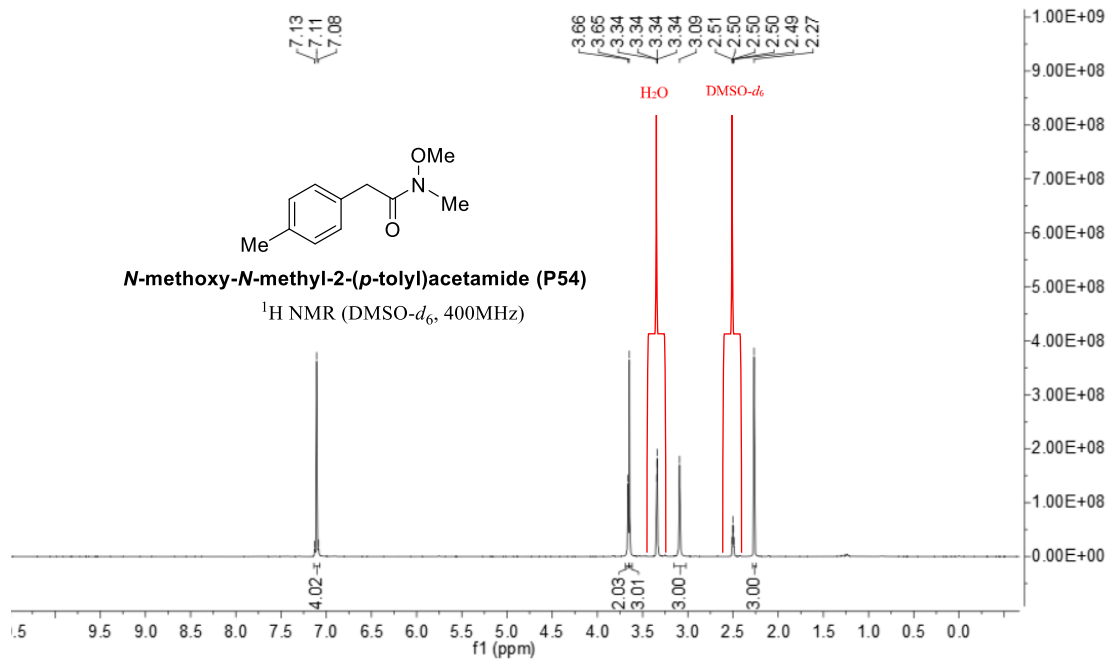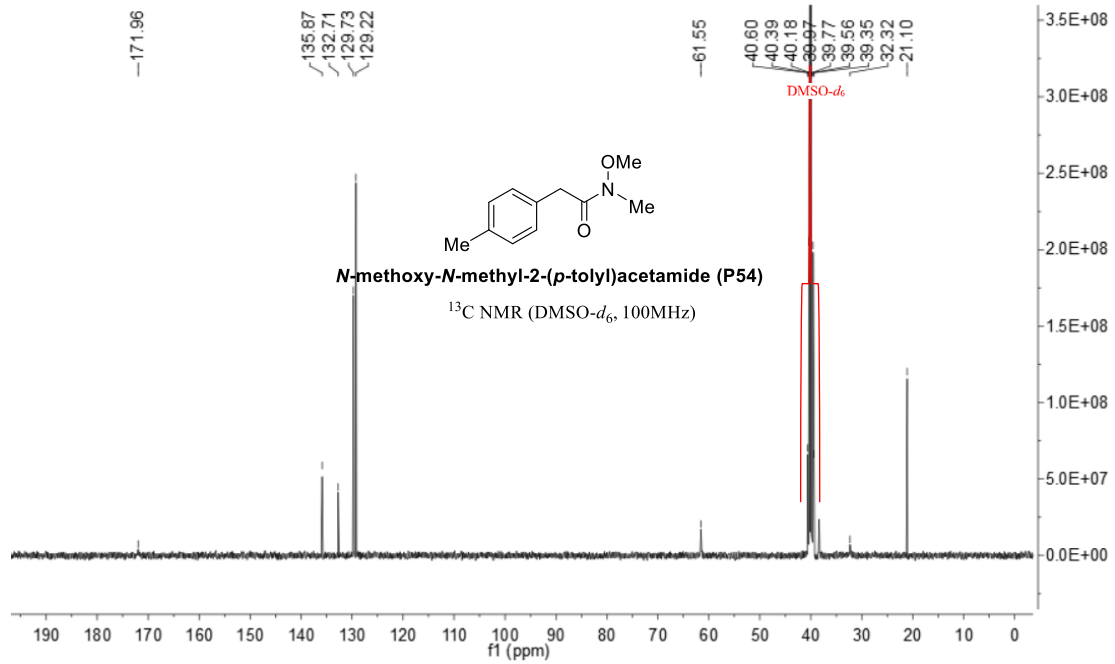

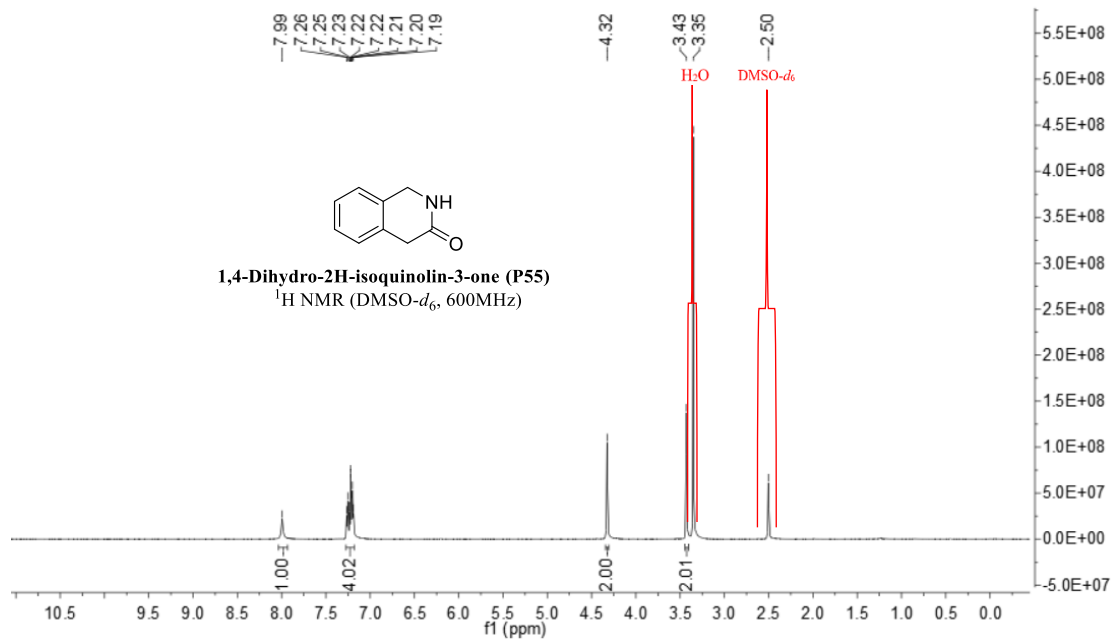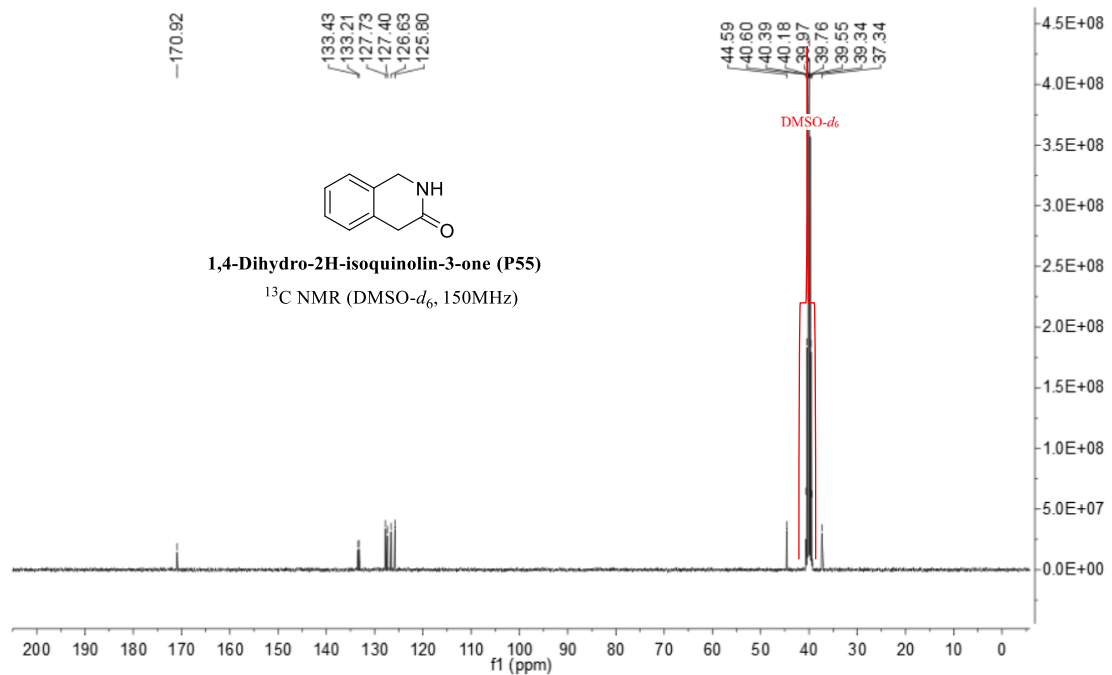

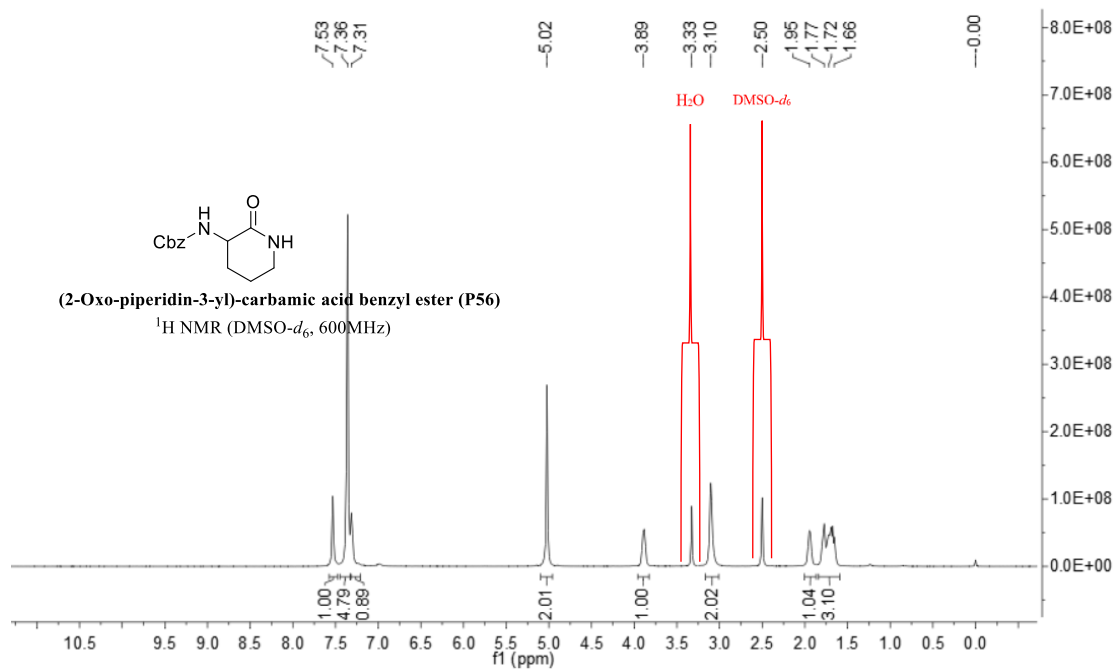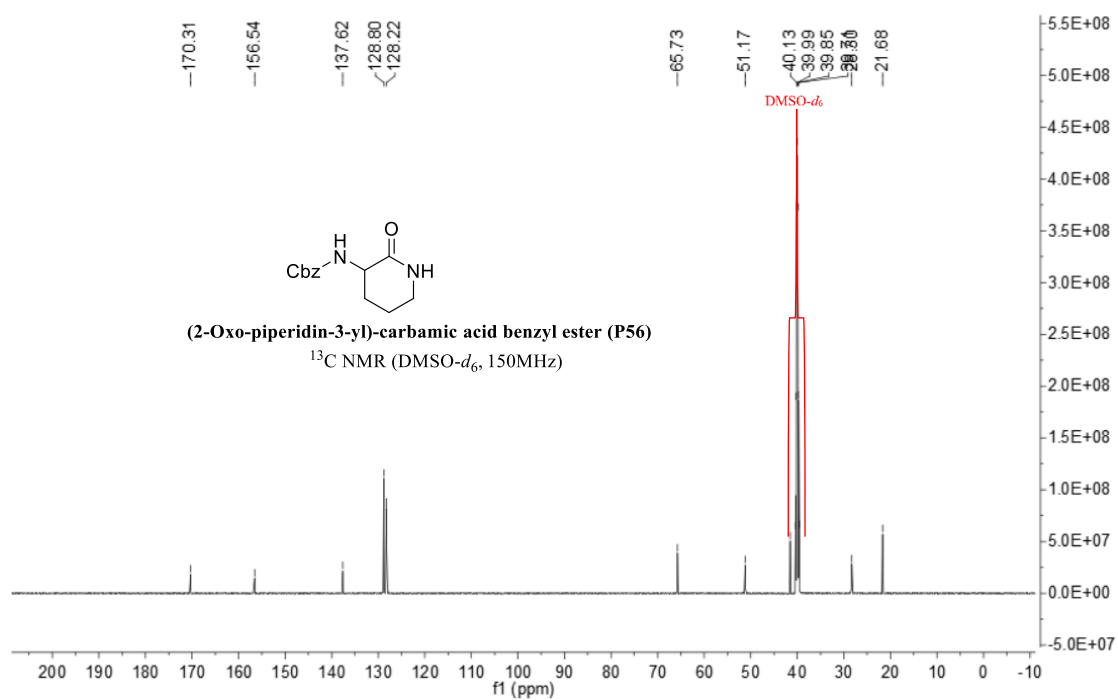

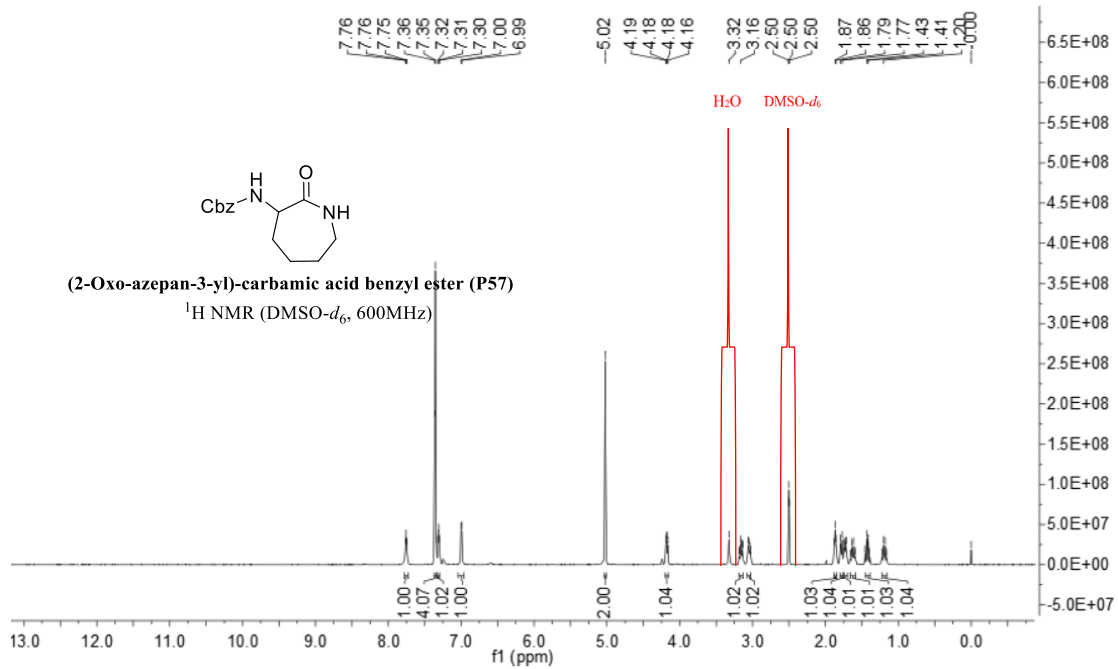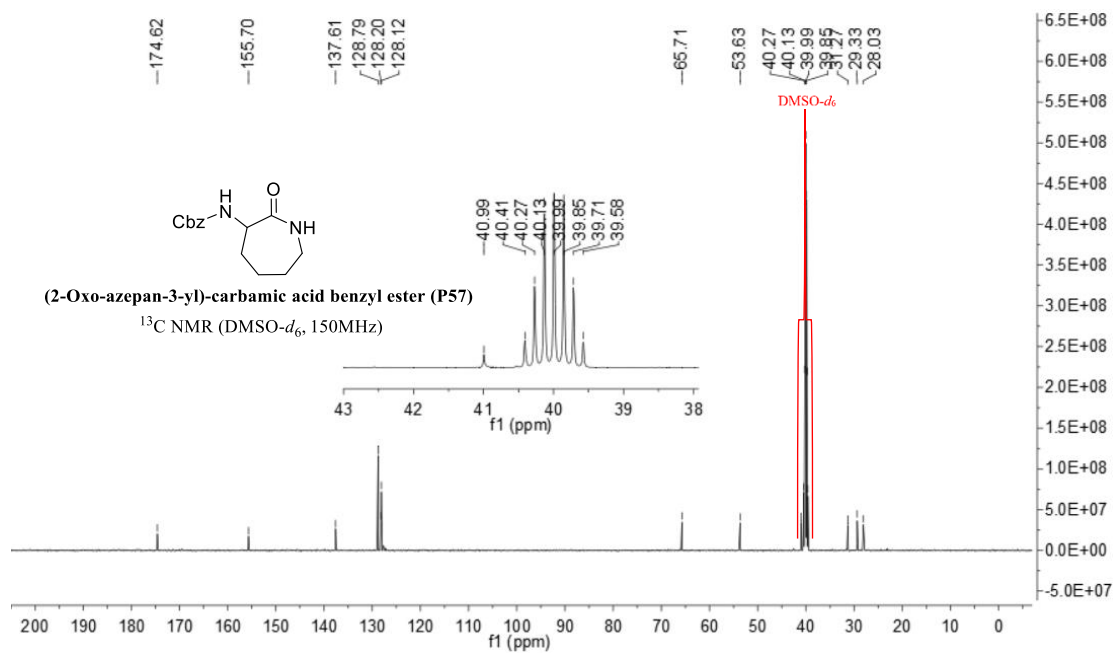

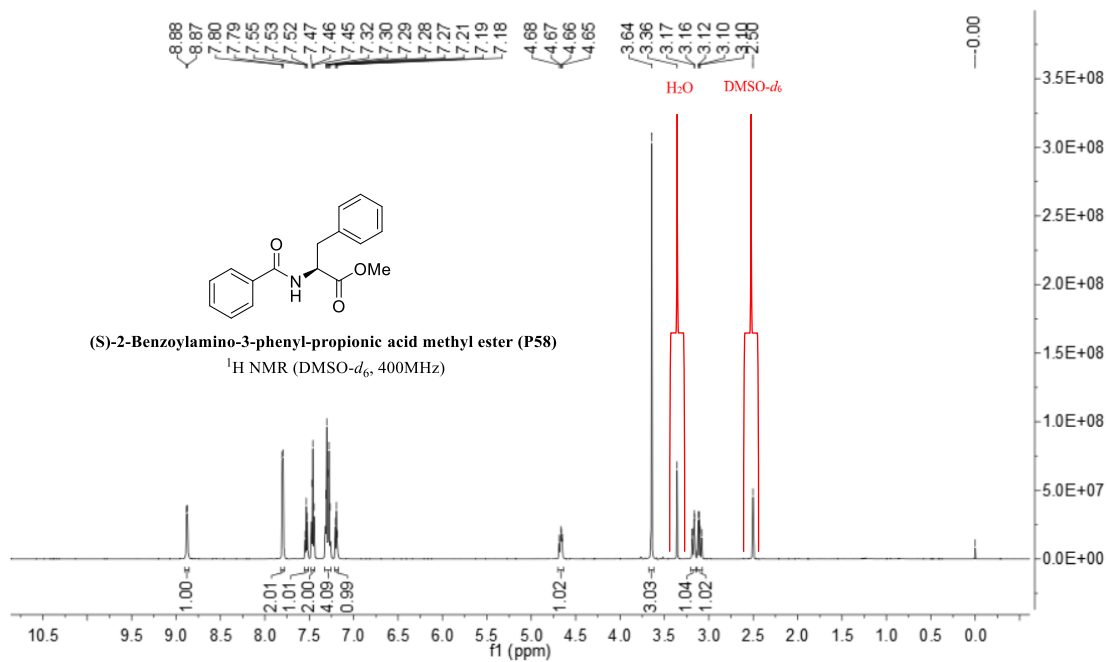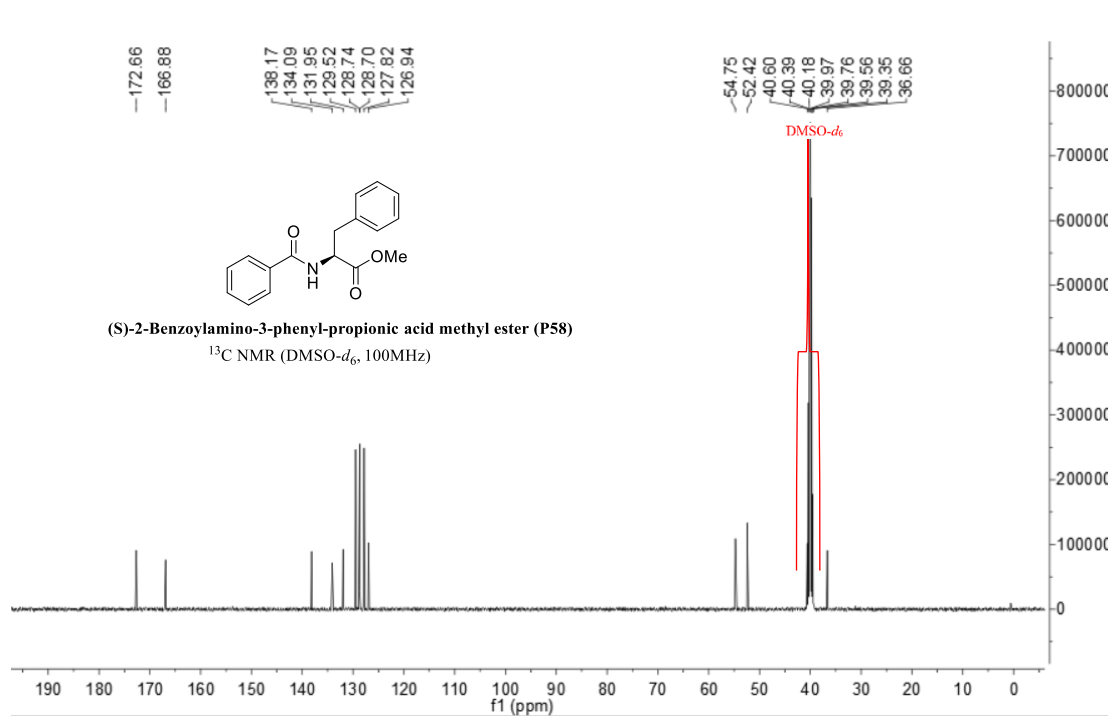

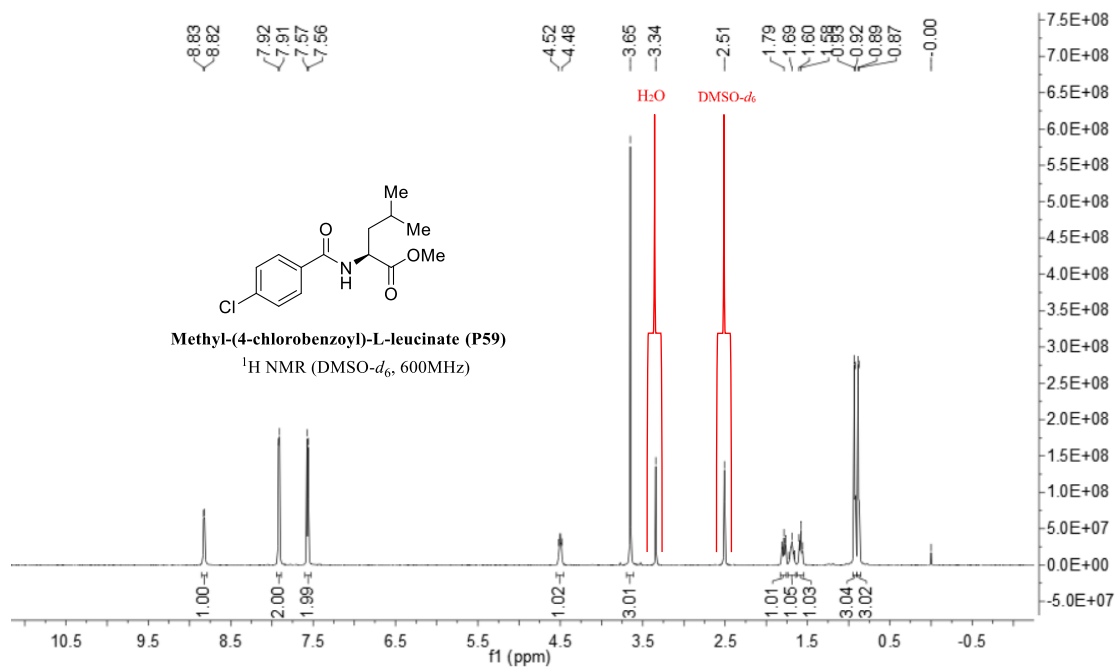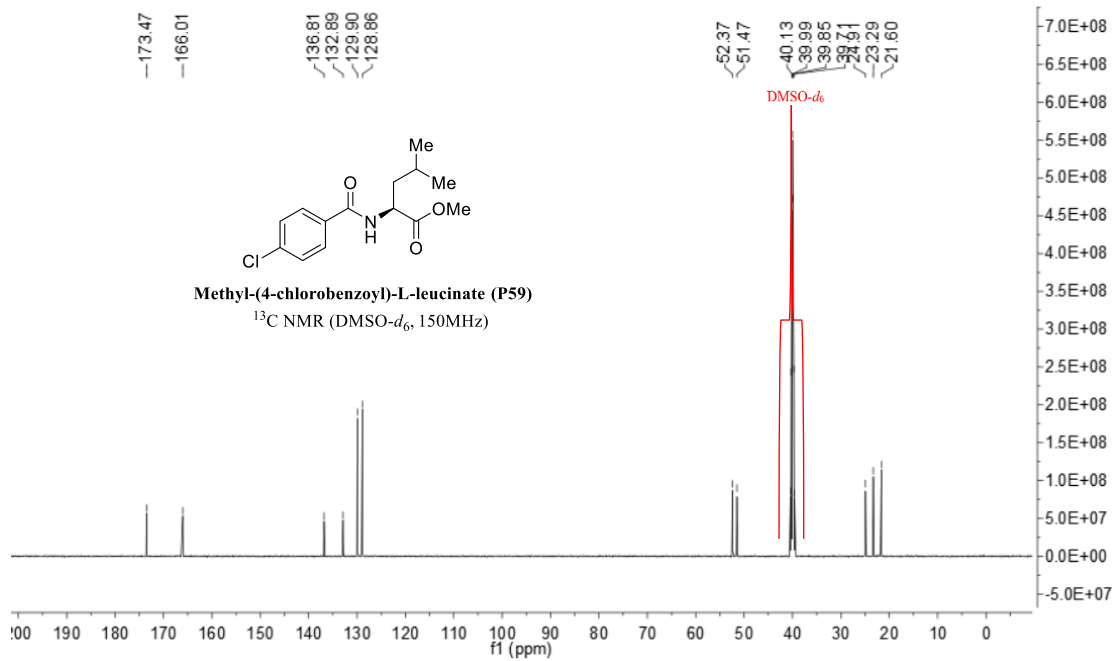

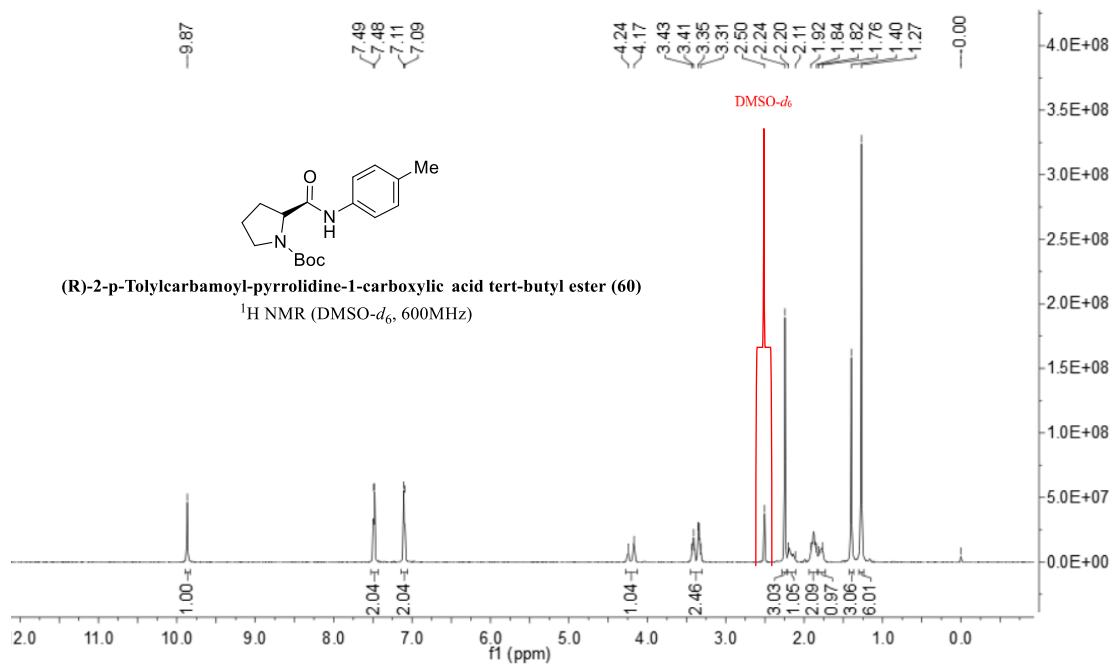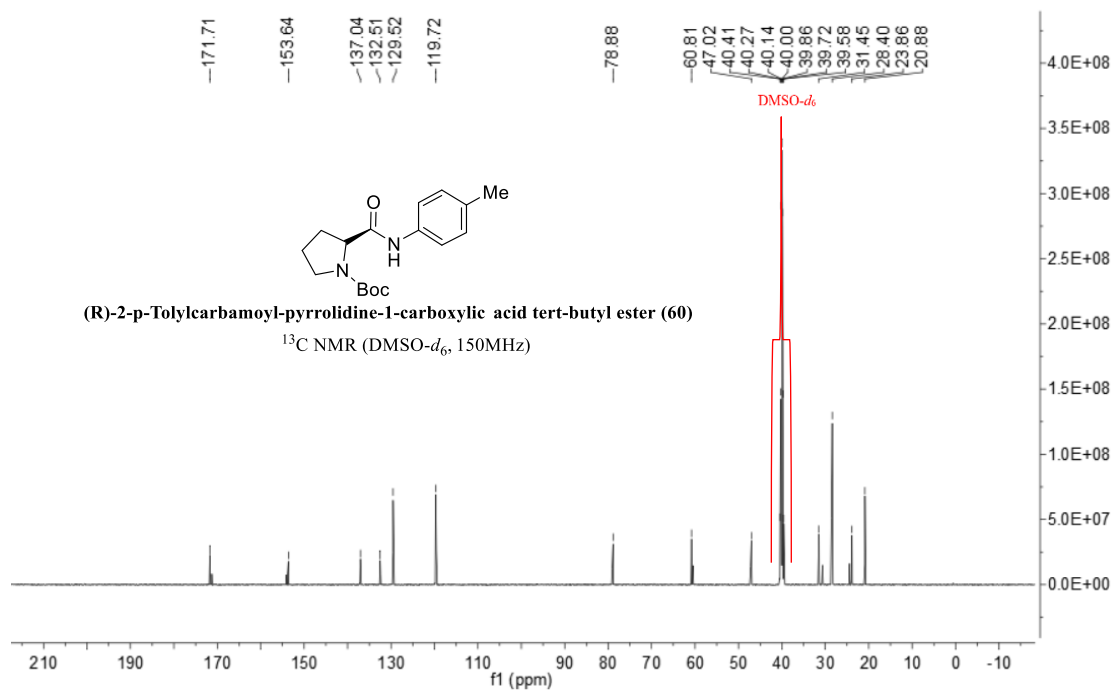



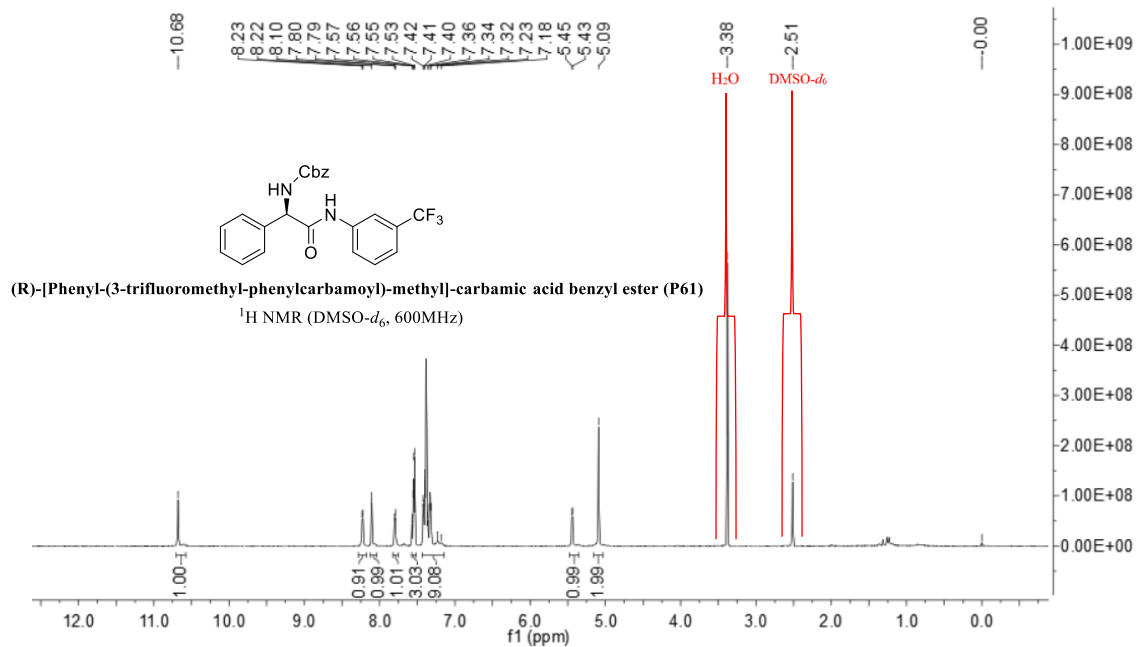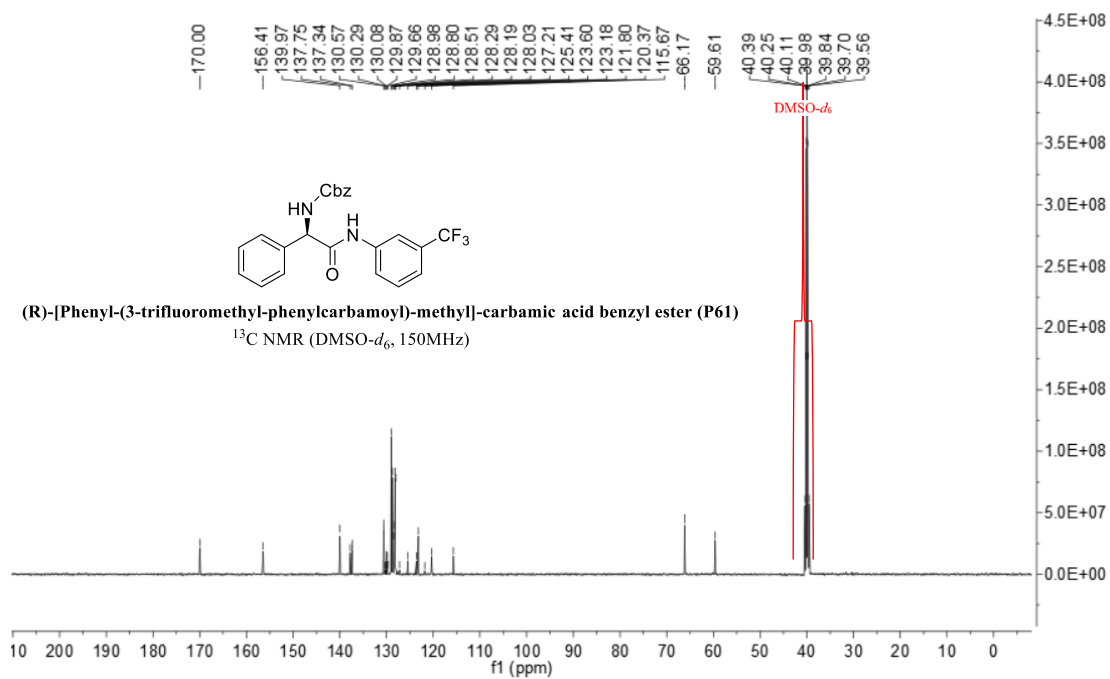

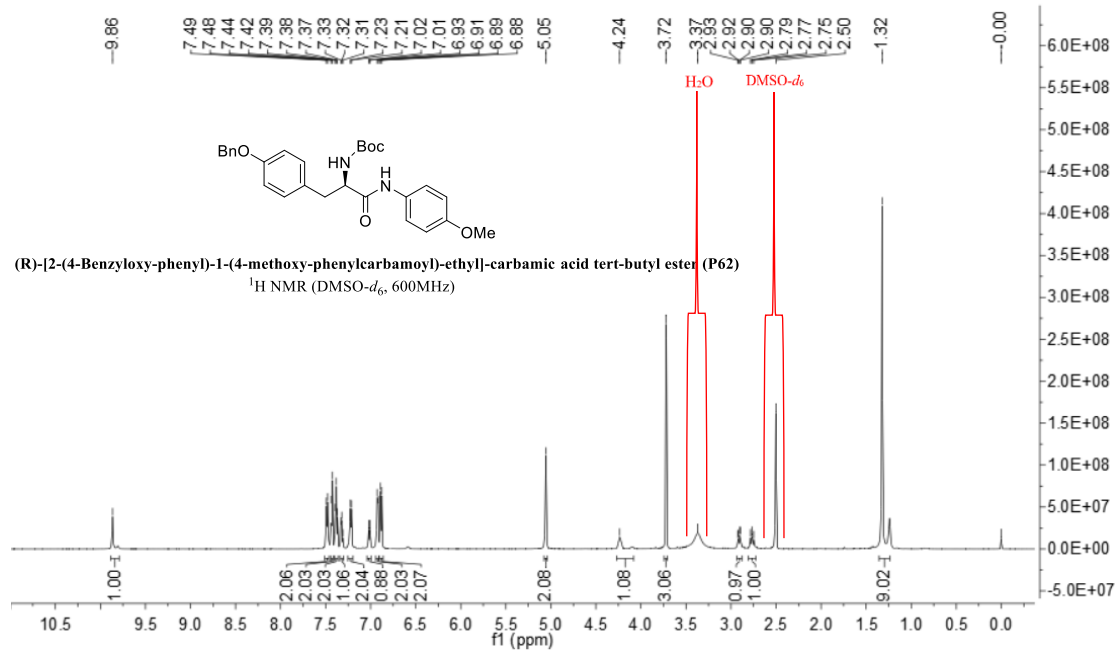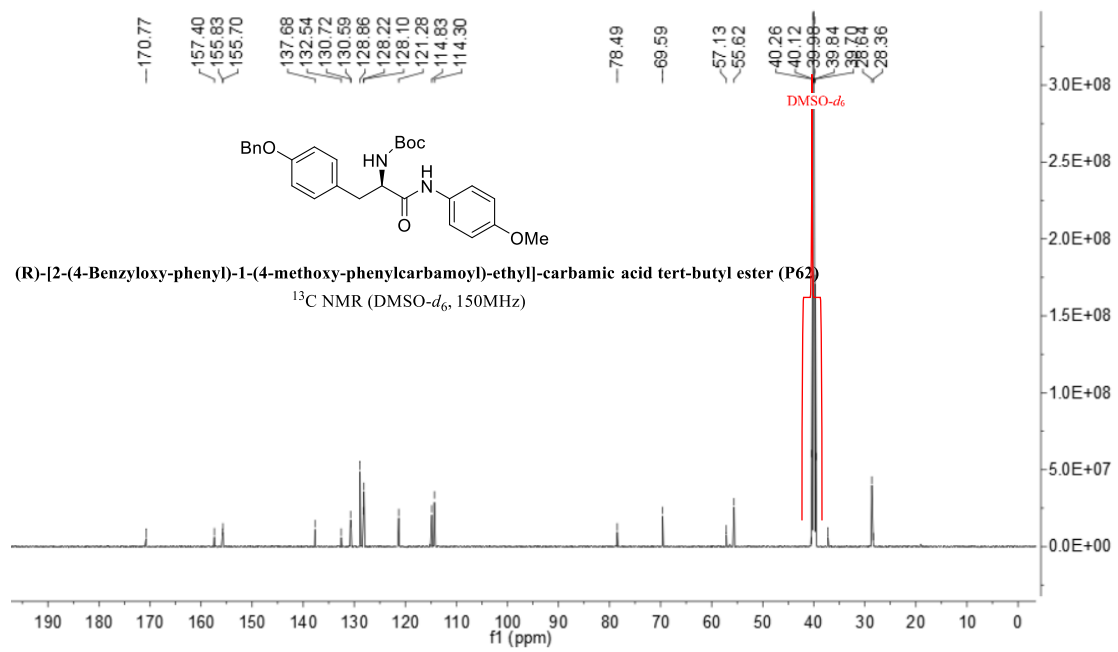

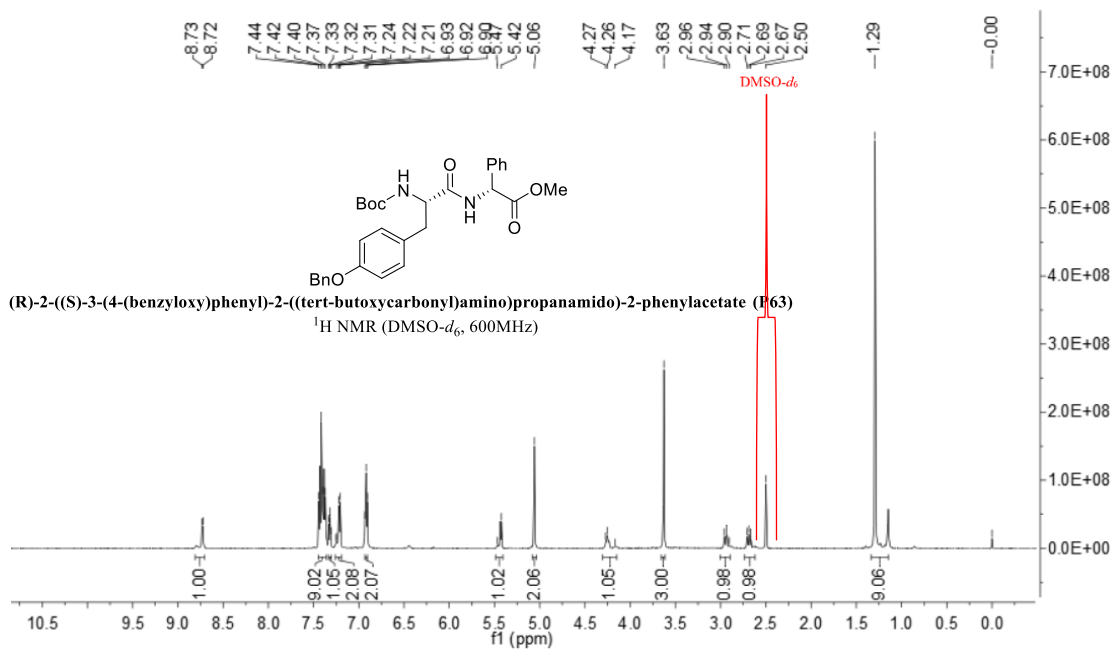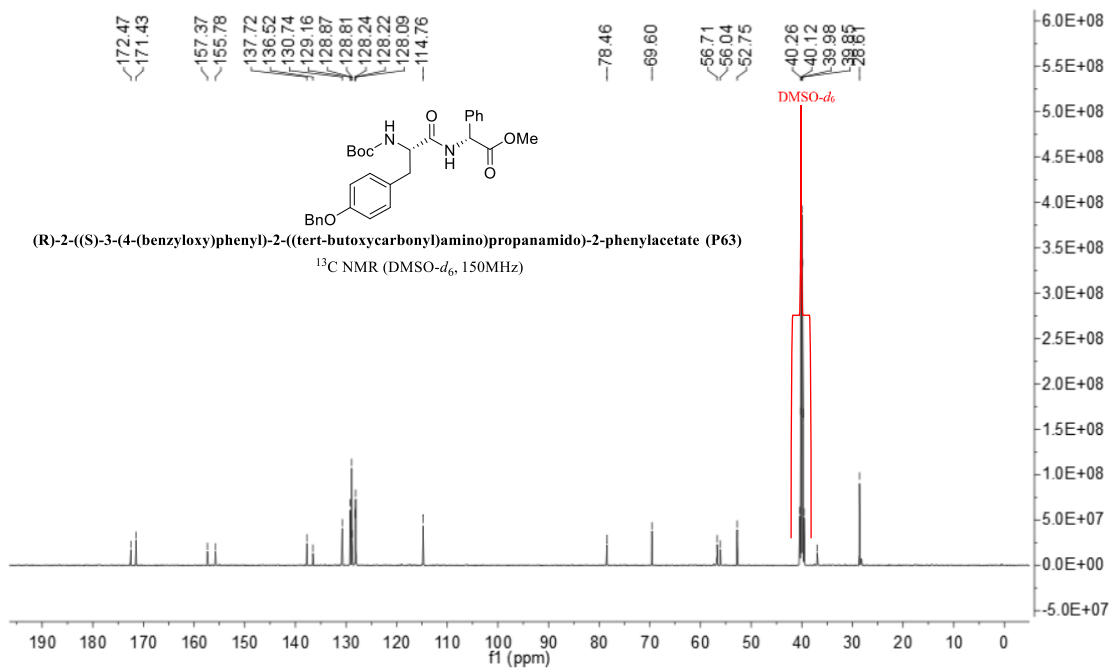

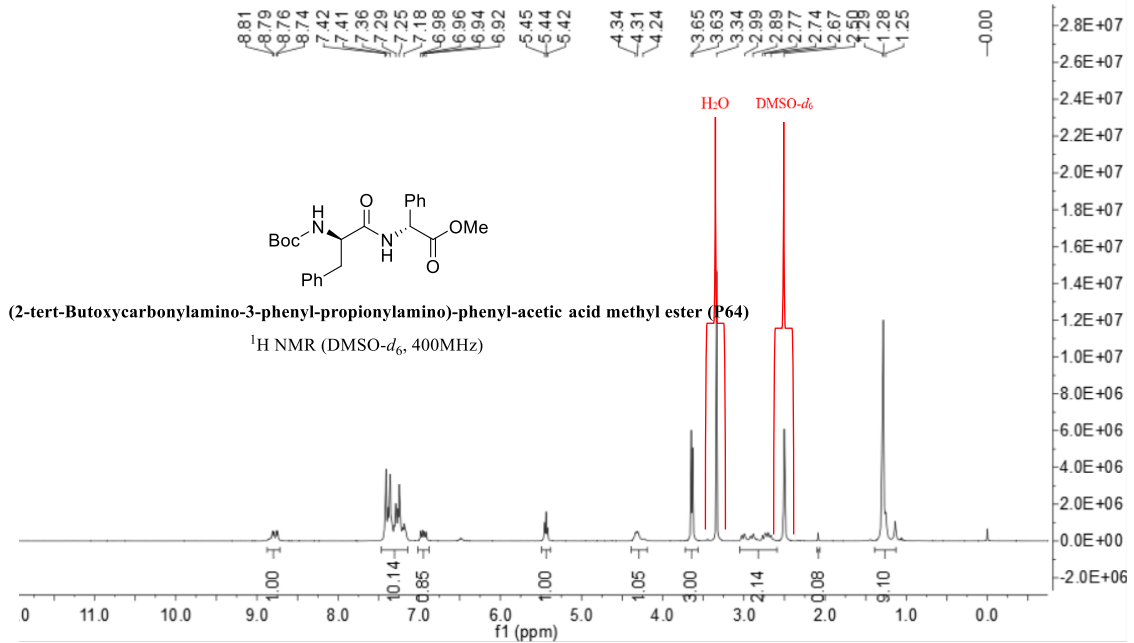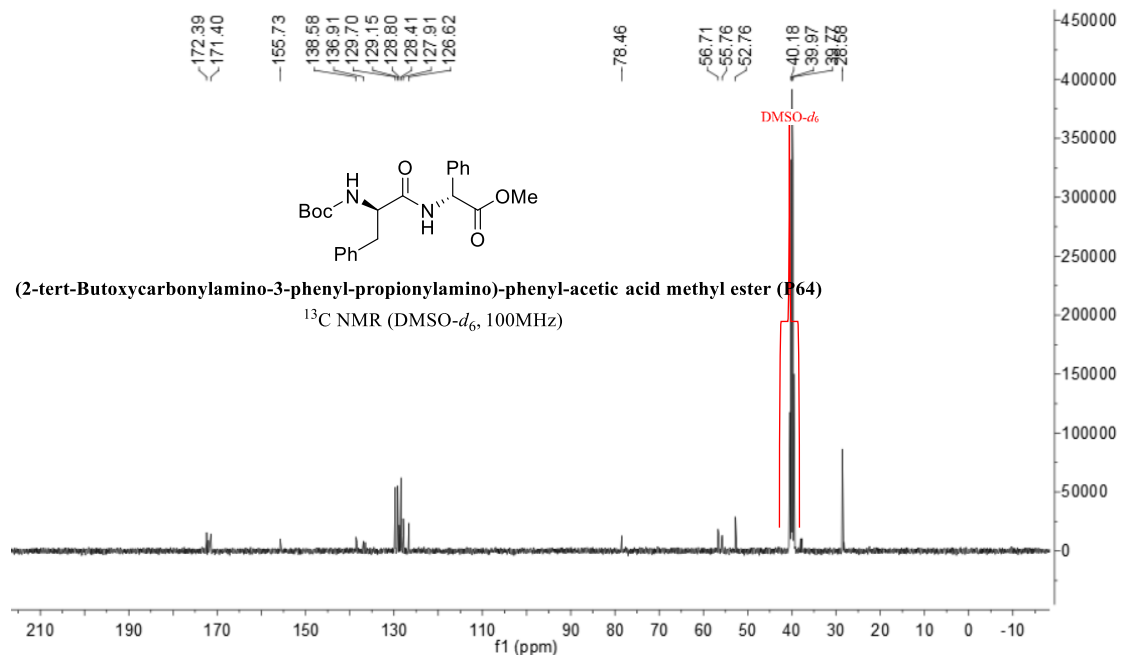

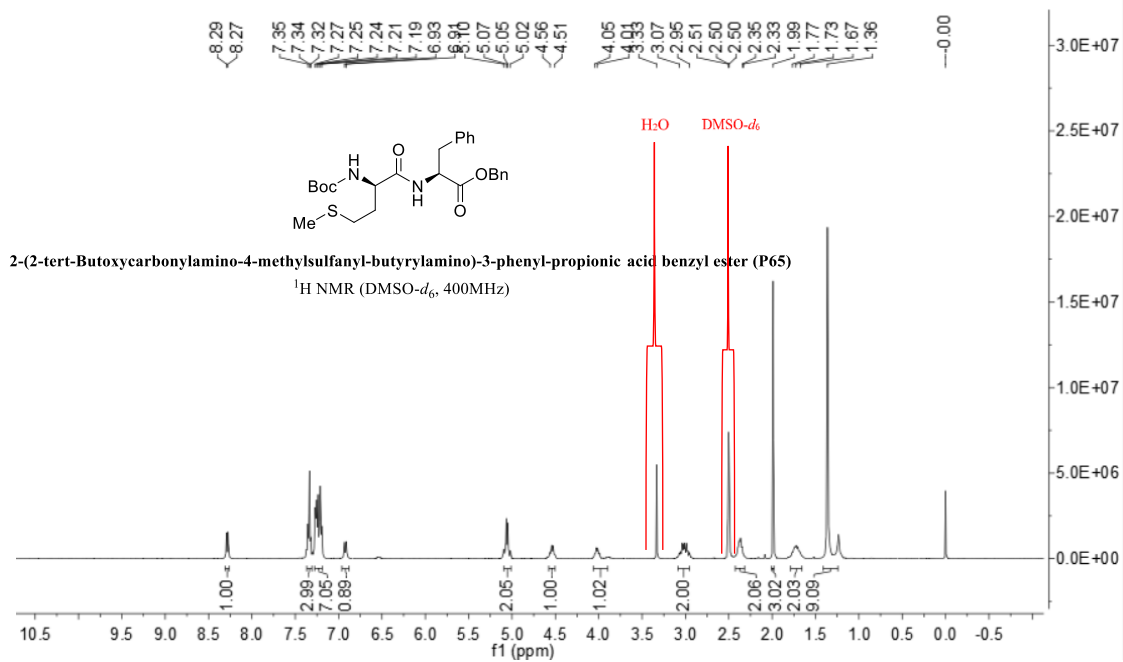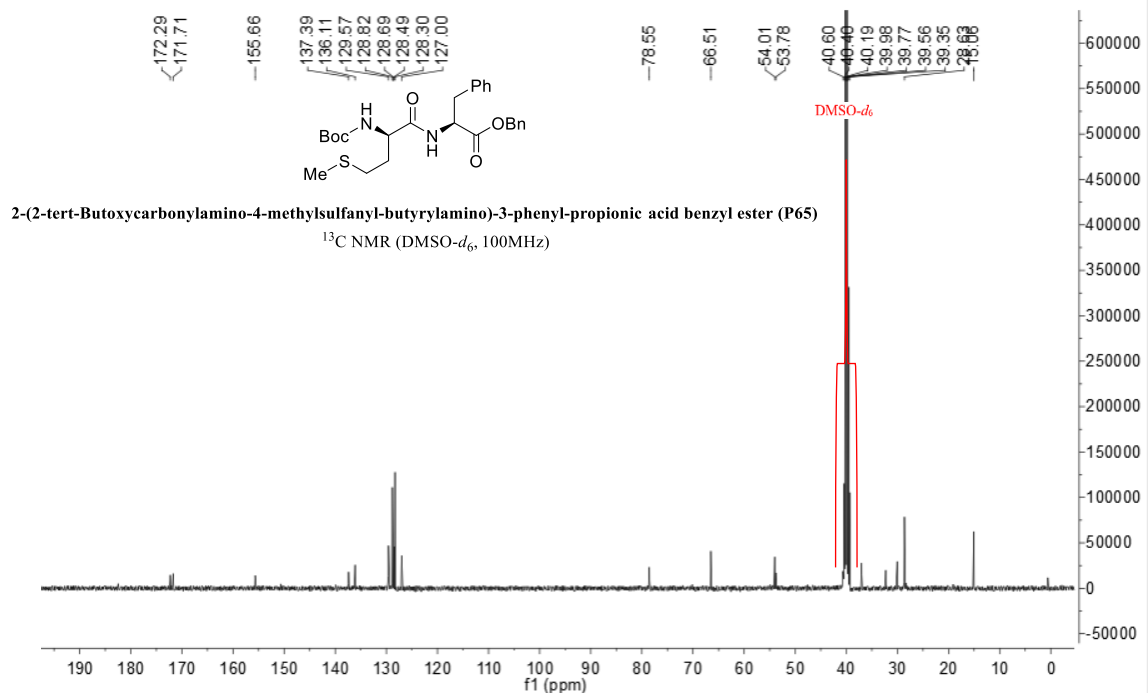

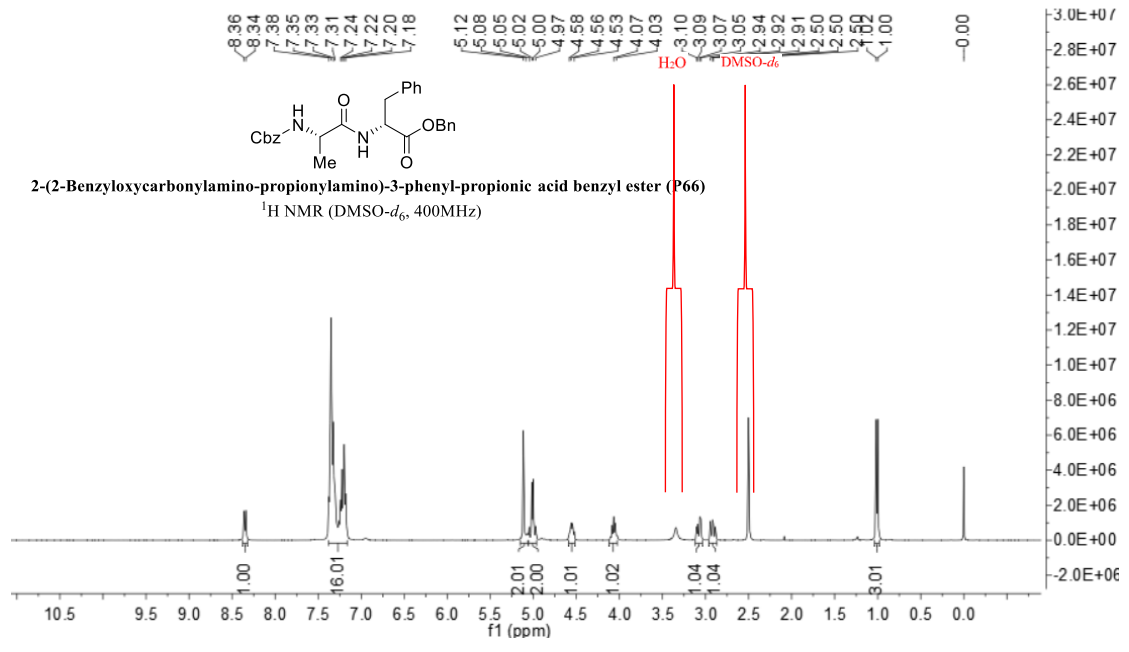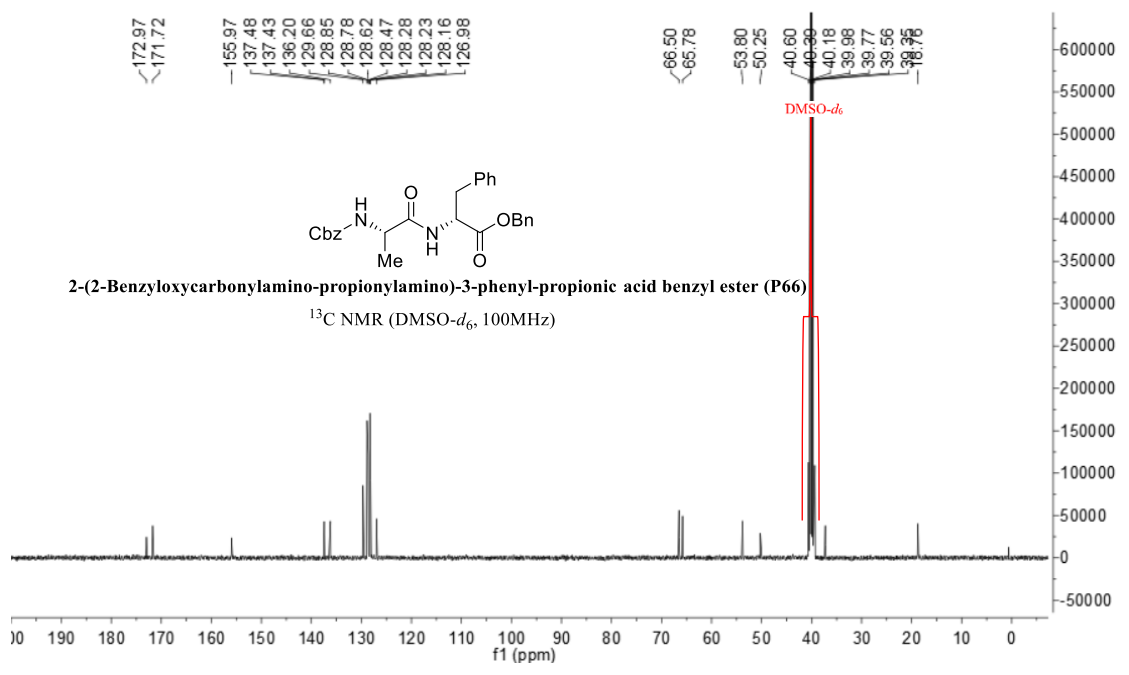

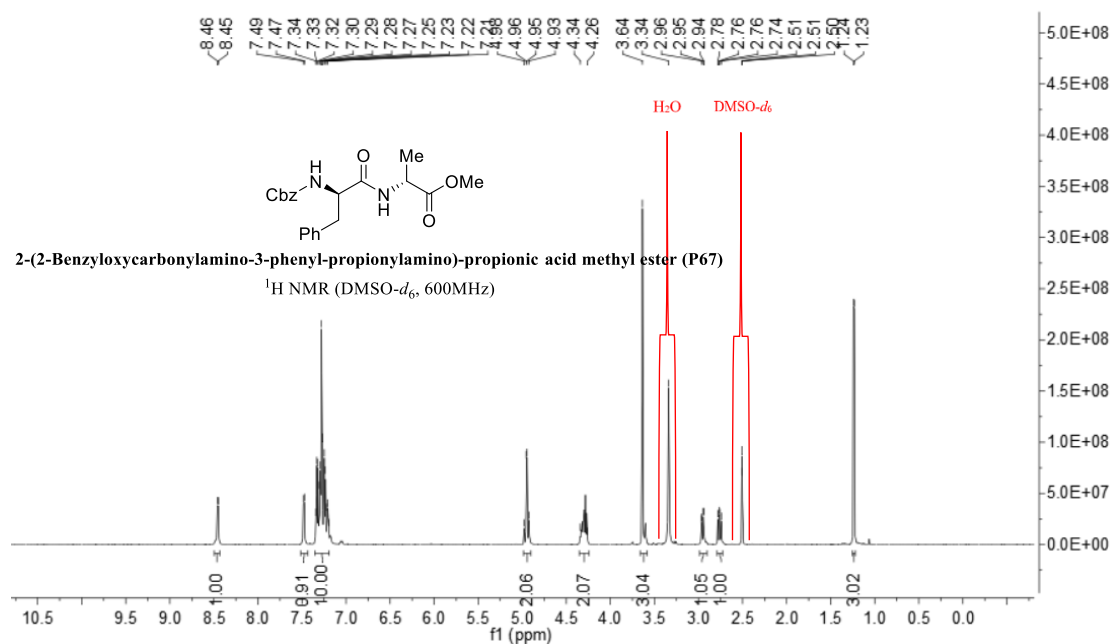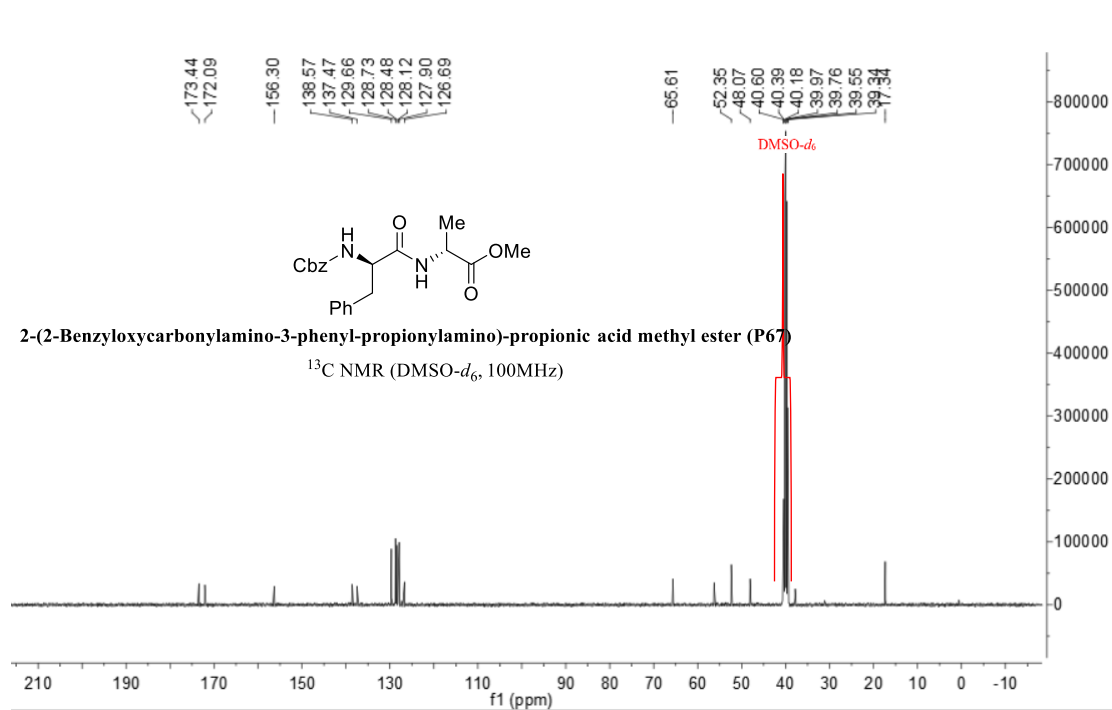

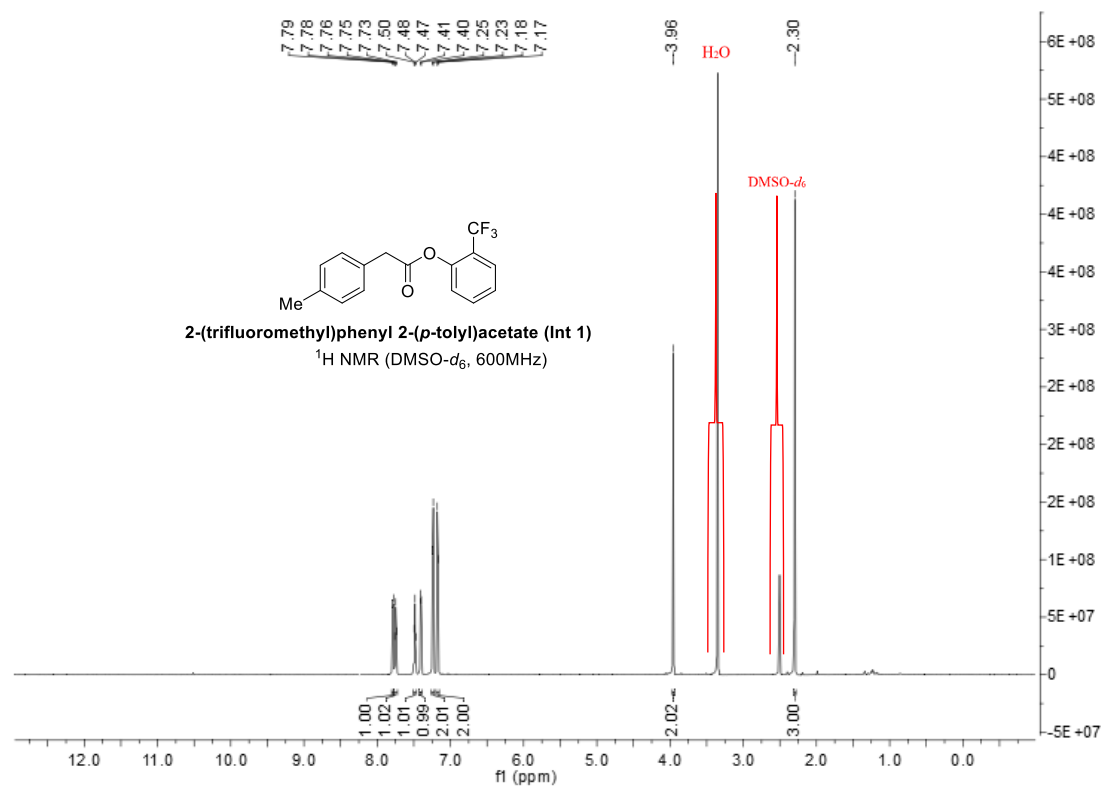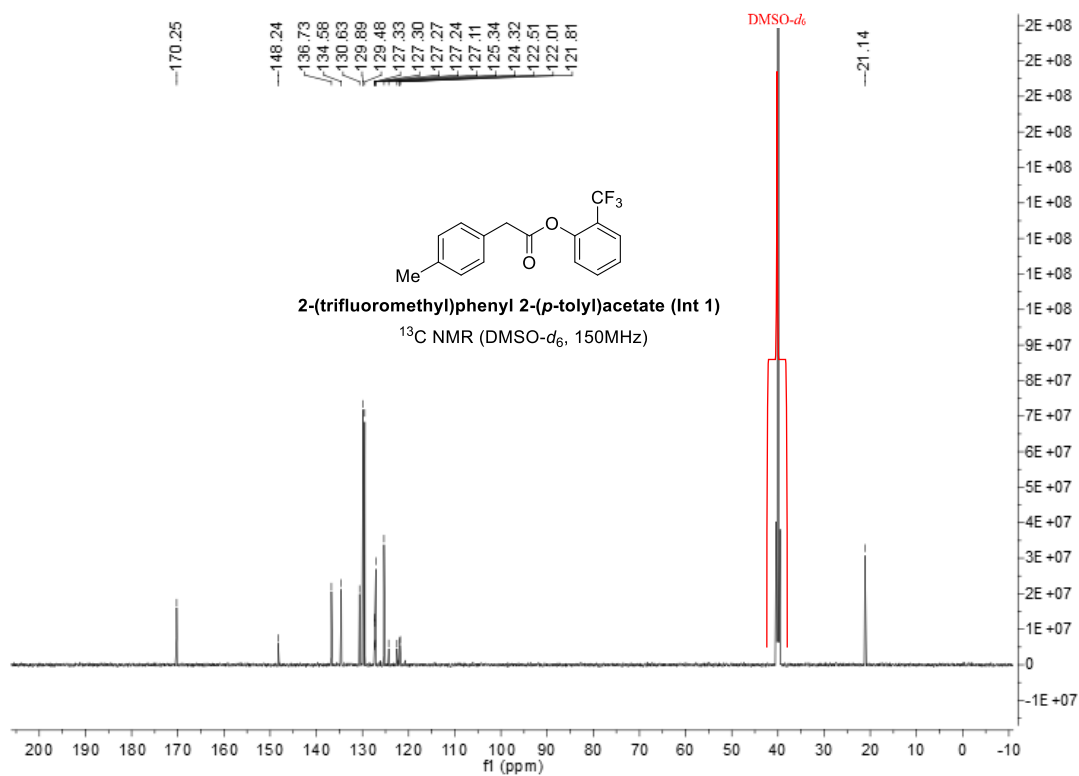



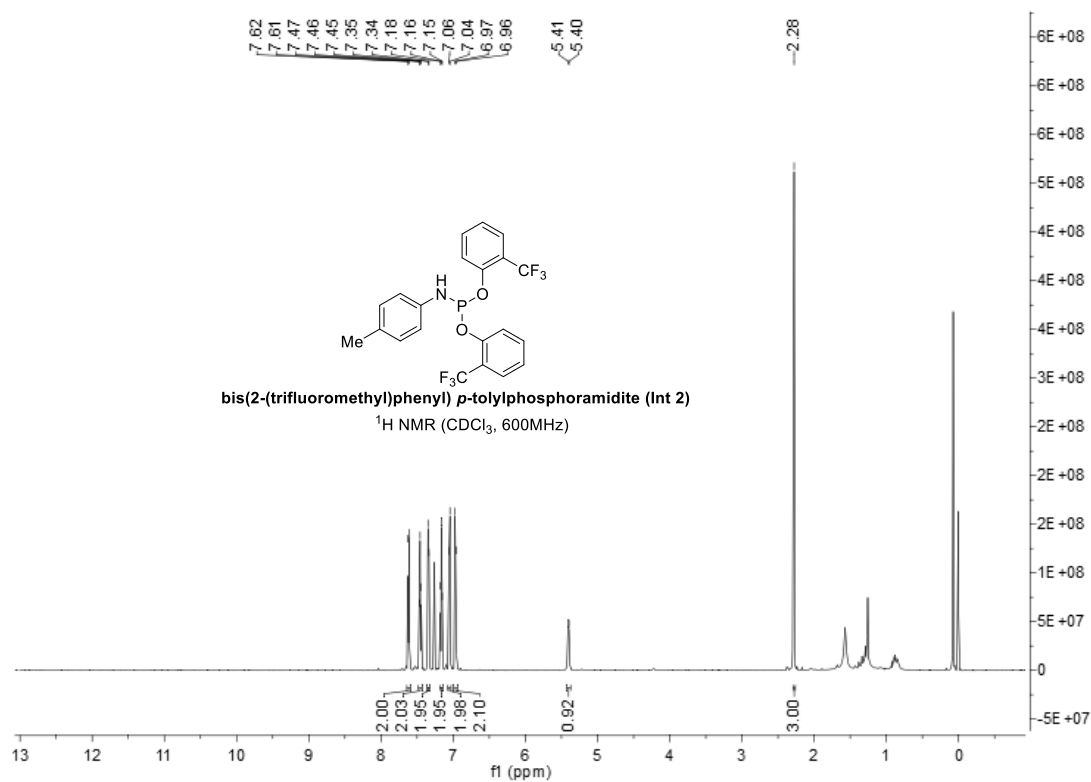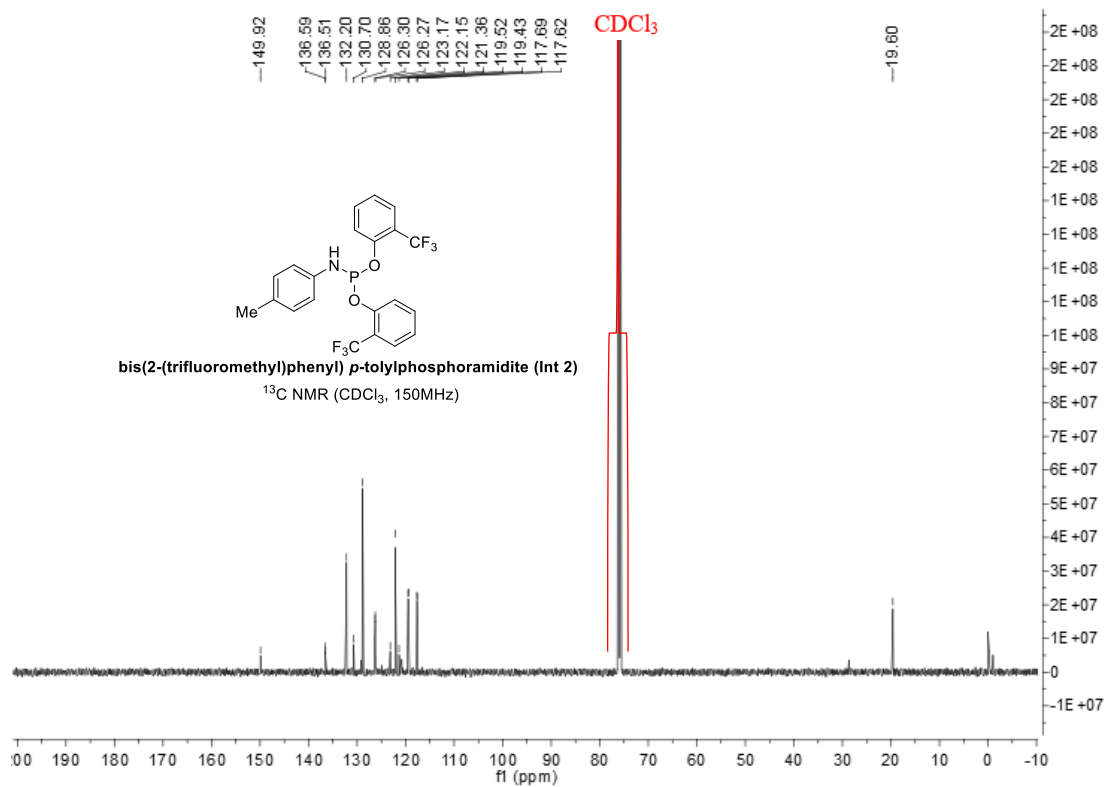

## 6. Chiral HPLC analysis

HPLC condition: Chiralcel OD-H column; hexanes: isopropanol = 85:15; flow rate = 1.0 ml/min; detection wavelength = 254 nm; column temperature: 30°C.

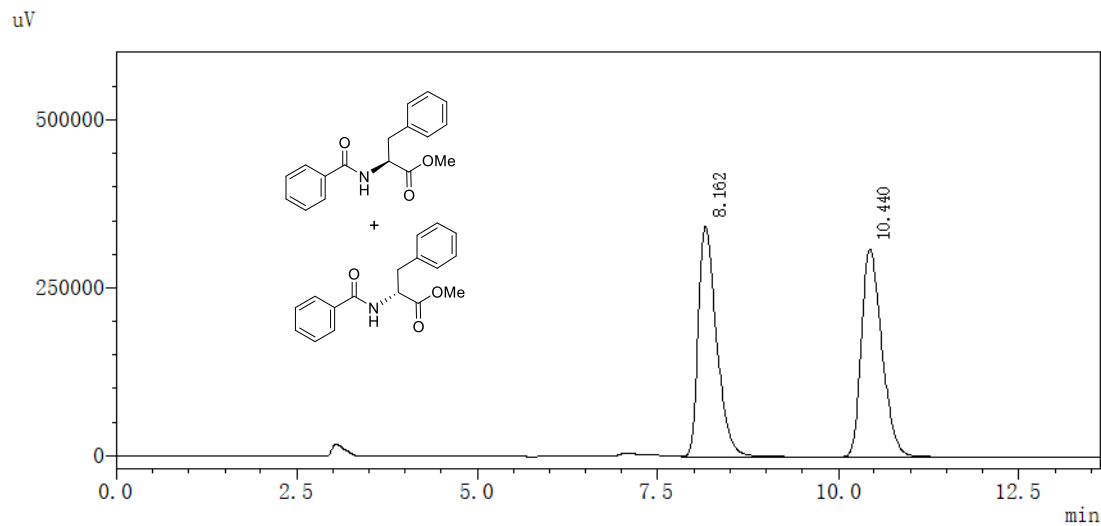

| Peak NO | Area(%) | Area    | RT(min) | Height(mAU) |
|---------|---------|---------|---------|-------------|
| 1       | 49.642  | 6087885 | 8.162   | 344471      |
| 2       | 50.358  | 6175731 | 10.440  | 309287      |

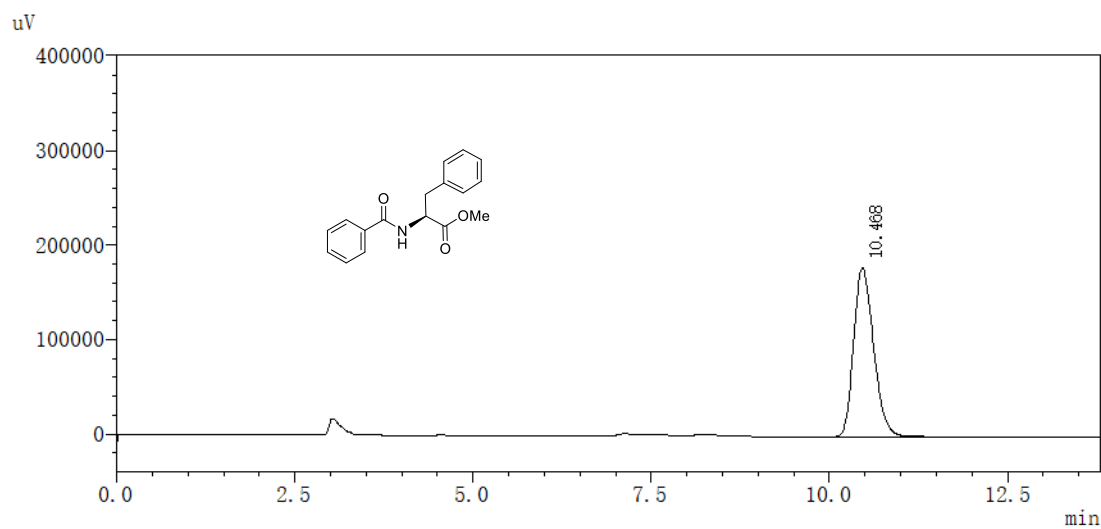

| Peak NO | Area(%) | Area    | RT(min) | Height(mAU) |
|---------|---------|---------|---------|-------------|
| 1       | 100.000 | 3513938 | 10.468  | 178537      |
| Total   | 100.000 | 3529386 |         | 179848      |

HPLC condition: Chiralcel OD-H column; hexanes: isopropanol= 85:15; flow rate= 1.0 ml/min;  
detection wavelength= 254 nm; column temperature: 30°C.

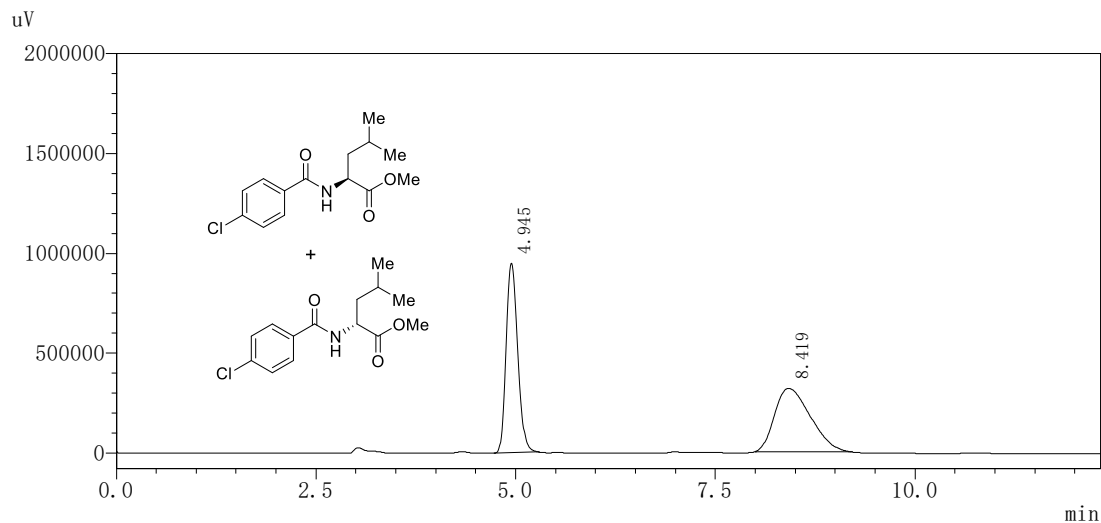

| Peak NO | Area(%) | Area    | RT(min) | Height(mAU) |
|---------|---------|---------|---------|-------------|
| 1       | 49.678  | 9746188 | 4.945   | 950072      |
| 2       | 50.322  | 9872510 | 8.419   | 316551      |

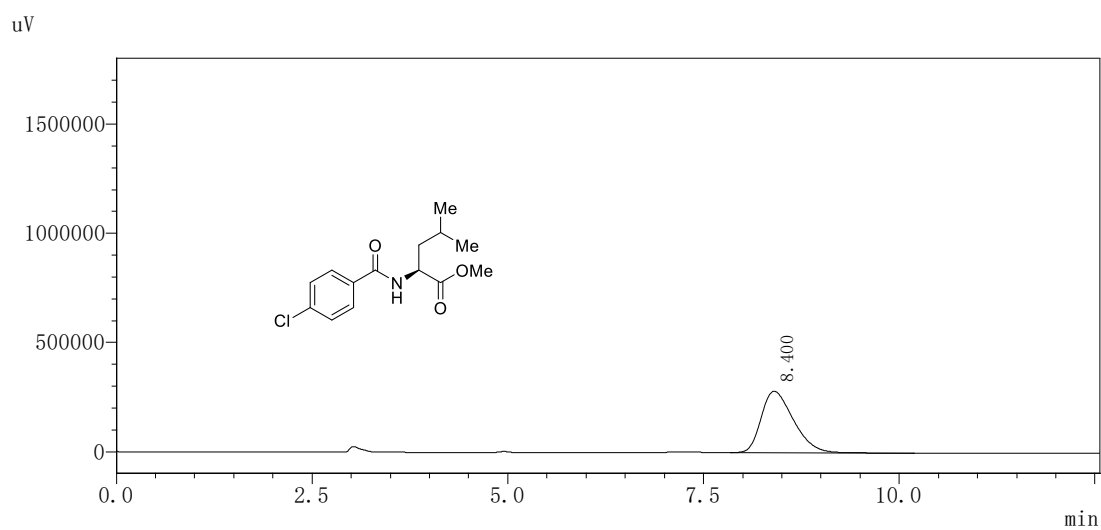

| Peak NO | Area(%) | Area    | RT(min) | Height(mAU) |
|---------|---------|---------|---------|-------------|
| 1       | 100.000 | 8222508 | 8.400   | 282816      |
| Total   | 100.000 | 8222508 |         | 282816      |

HPLC condition: Chiralcel IC column; hexanes: isopropanol= 85:15; flow rate= 1.0 ml/min; detection wavelength= 254 nm; column temperature: Room Temperature.

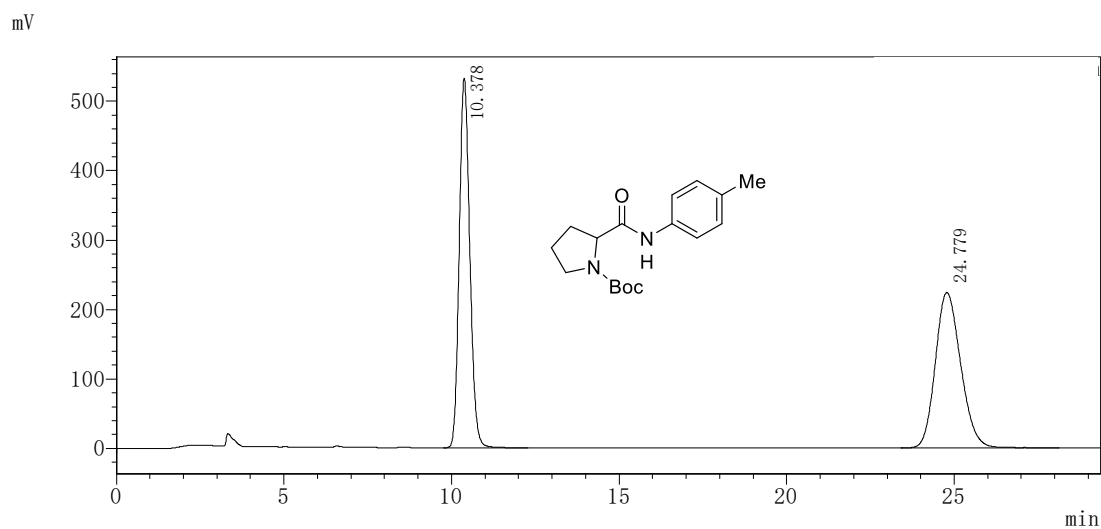

| Peak NO | Area(%) | Area     | RT(min) | Height(mAU) |
|---------|---------|----------|---------|-------------|
| 1       | 49.827  | 11660938 | 10.378  | 532368      |
| 2       | 50.173  | 11742121 | 24.779  | 223708      |

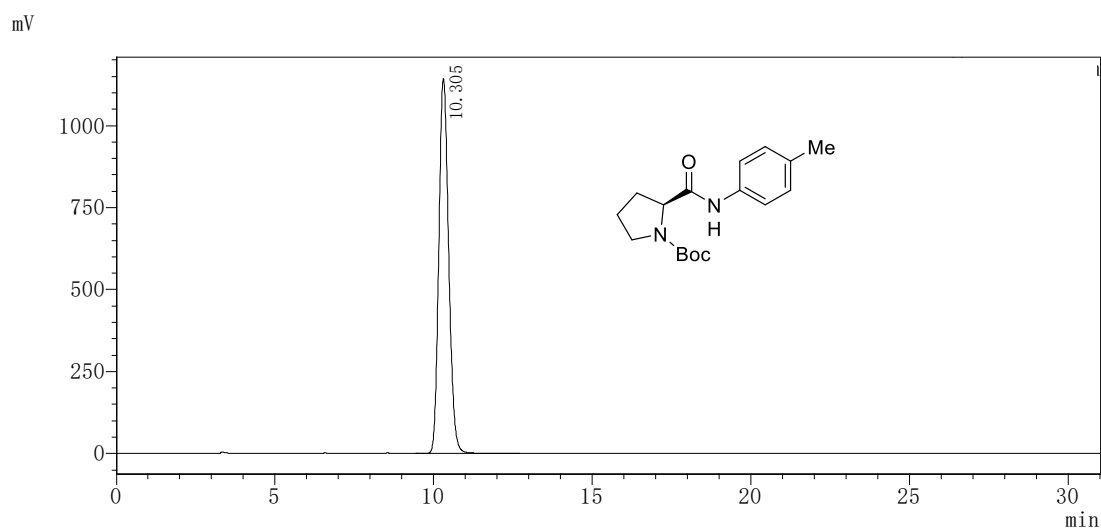

| Peak NO | Area(%) | Area     | RT(min) | Height(mAU) |
|---------|---------|----------|---------|-------------|
| 1       | 100.000 | 24711234 | 10.305  | 1143869     |
| Total   | 100.000 | 24711234 |         | 1143869     |

HPLC condition: IC column; hexanes: isopropanol= 85:15; flow rate= 1.0 ml/min; detection wavelength= 254 nm; column temperature: 30°C.

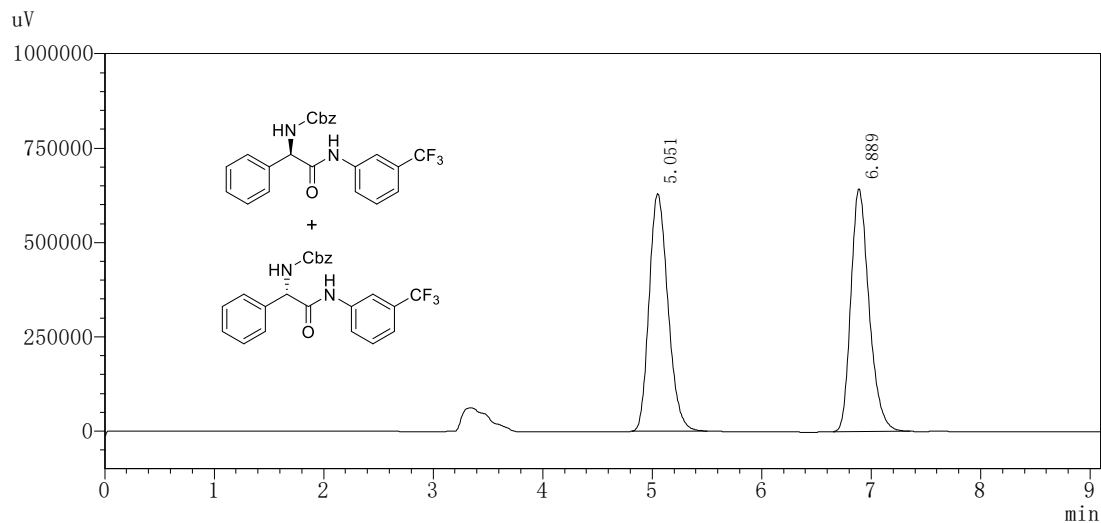

| Peak NO | Area(%) | Area    | RT(min) | Height(mAU) |
|---------|---------|---------|---------|-------------|
| 1       | 50.299  | 7517823 | 5.501   | 629083      |
| 2       | 49.701  | 7428321 | 6.889   | 642783      |

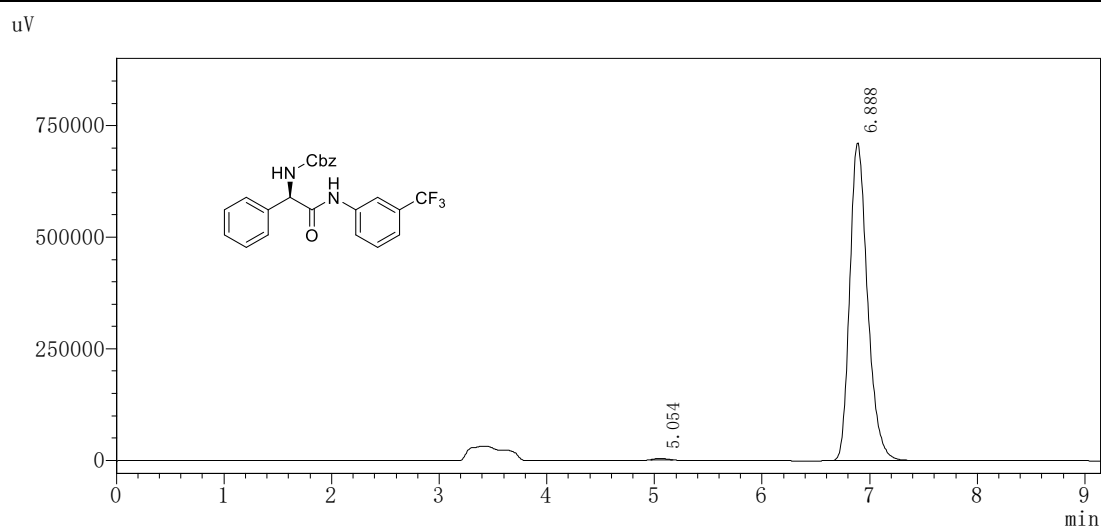

| Peak NO | Area(%) | Area    | RT(min) | Height(mAU) |
|---------|---------|---------|---------|-------------|
| 1       | 0.231   | 18809   | 5.504   | 2685        |
| 2       | 99.769  | 8136532 | 6.888   | 710629      |

HPLC condition: Chiralcel OD-H column; hexanes: isopropanol= 90:10; flow rate= 1.0 ml/min; detection wavelength= 254 nm; column temperature: 30°C.

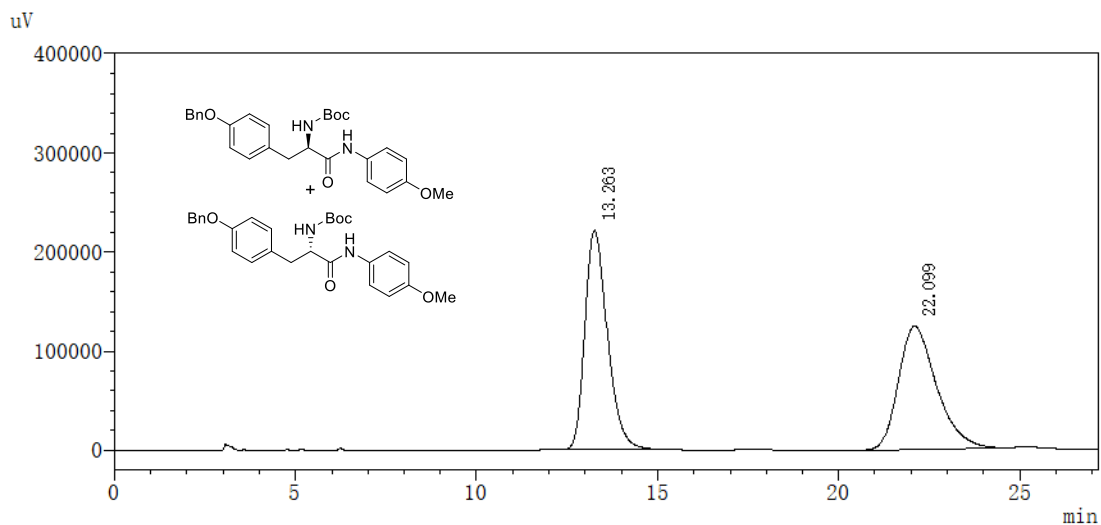

| Peak NO | Area(%) | Area    | RT(min) | Height(mAU) |
|---------|---------|---------|---------|-------------|
| 1       | 50.957  | 9453700 | 13.263  | 220333      |
| 2       | 49.043  | 9098572 | 22.099  | 123923      |

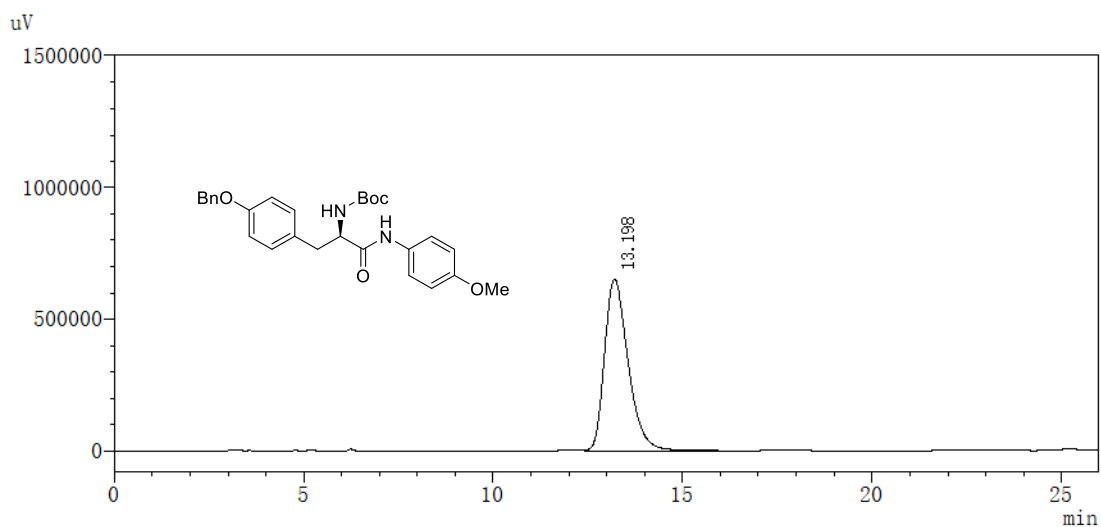

| Peak NO | Area(%) | Area     | RT(min) | Height(mAU) |
|---------|---------|----------|---------|-------------|
| 1       | 100.000 | 28331229 | 13.198  | 653877      |
| Total   | 100.000 | 28331229 |         | 653877      |

HPLC condition: IC column; hexanes: isopropanol= 85:15; flow rate= 1.0 ml/min; detection wavelength= 254 nm; column temperature: 30°C.

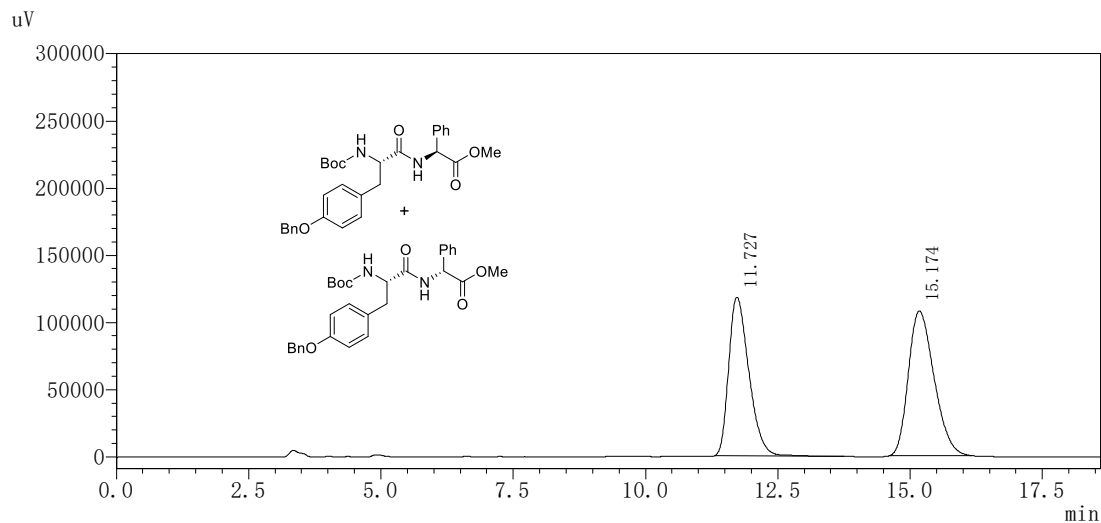

| Peak NO | Area(%) | Area    | RT(min) | Height(mAU) |
|---------|---------|---------|---------|-------------|
| 1       | 46.308  | 3131752 | 11.727  | 117951      |
| 2       | 53.692  | 3631061 | 15.174  | 107670      |

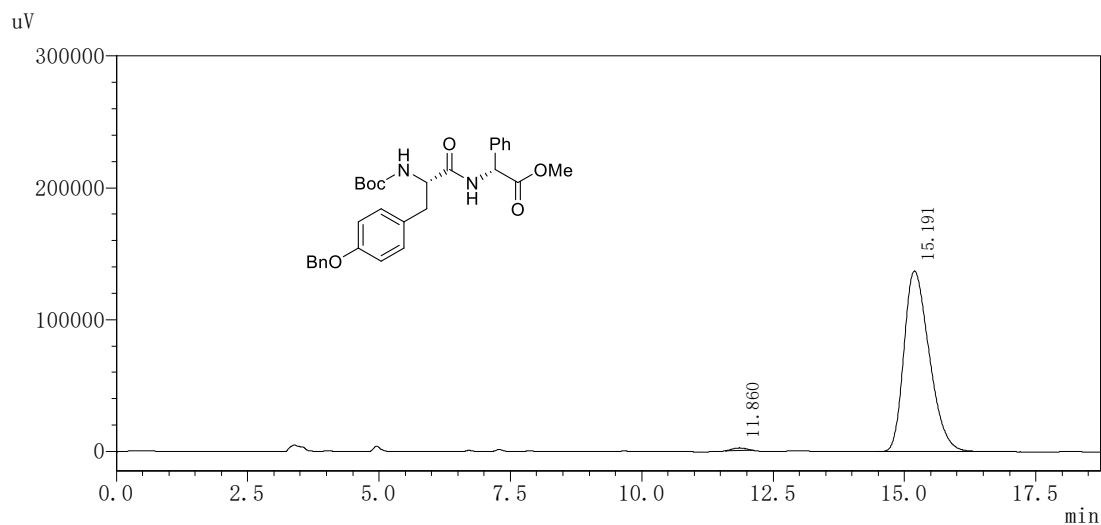

| Peak NO | Area(%) | Area    | RT(min) | Height(mAU) |
|---------|---------|---------|---------|-------------|
| 1       | 0.719   | 33406   | 11.860  | 1899        |
| 2       | 99.281  | 4615303 | 15.191  | 137179      |

HPLC condition: IC column; hexanes: isopropanal= 85:15; flow rate= 1.0 ml/min; detection wavelength= 254 nm; column temperature: 30°C.

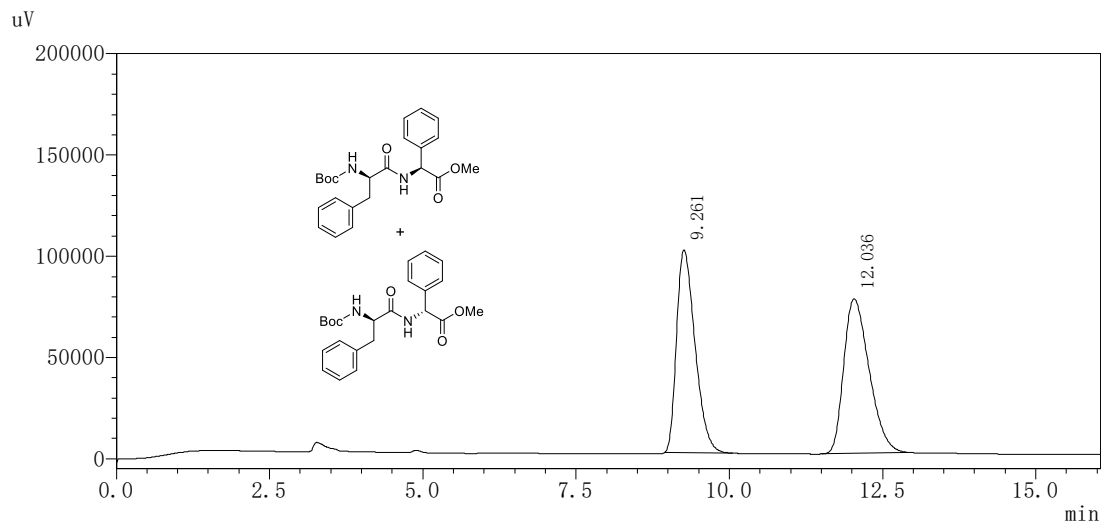

| Peak NO | Area(%) | Area    | RT(min) | Height(mAU) |
|---------|---------|---------|---------|-------------|
| 1       | 48.835  | 2098406 | 9.261   | 100039      |
| 2       | 51.165  | 2198561 | 12.036  | 76321       |

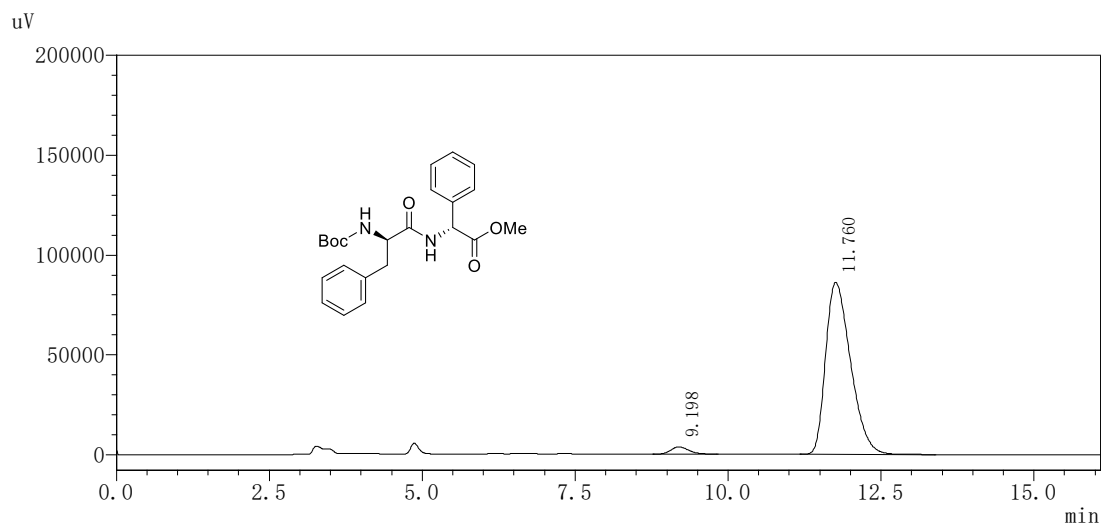

| Peak NO | Area(%) | Area    | RT(min) | Height(mAU) |
|---------|---------|---------|---------|-------------|
| 1       | 2.881   | 72611   | 9.198   | 3638        |
| 2       | 97.119  | 2447380 | 11.760  | 86135       |



HPLC condition: IC column; hexanes: isopropanal= 85:15; flow rate= 1.0 ml/min; detection wavelength= 254 nm; column temperature: 30°C.

uV

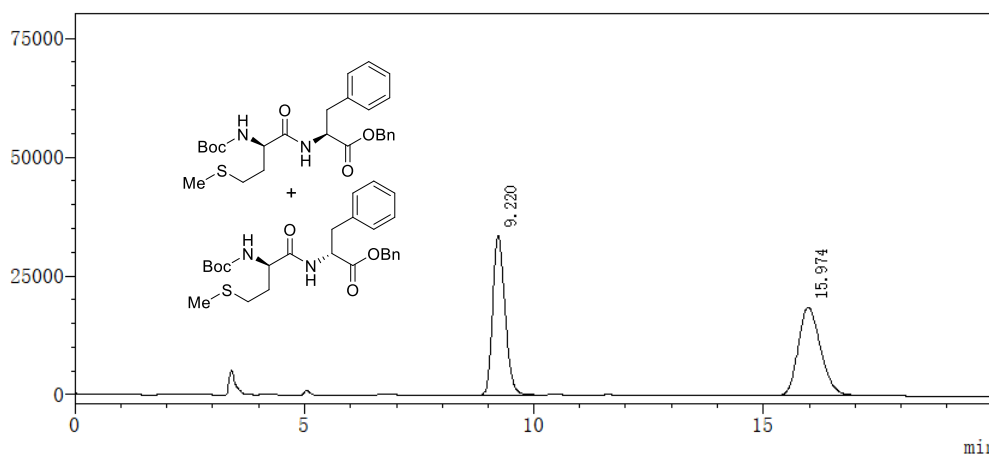

| Peak NO | Area(%) | Area   | RT(min) | Height(mAU) |
|---------|---------|--------|---------|-------------|
| 1       | 50.219  | 640207 | 9.220   | 33669       |
| 2       | 49.781  | 634628 | 15.974  | 18622       |

uV

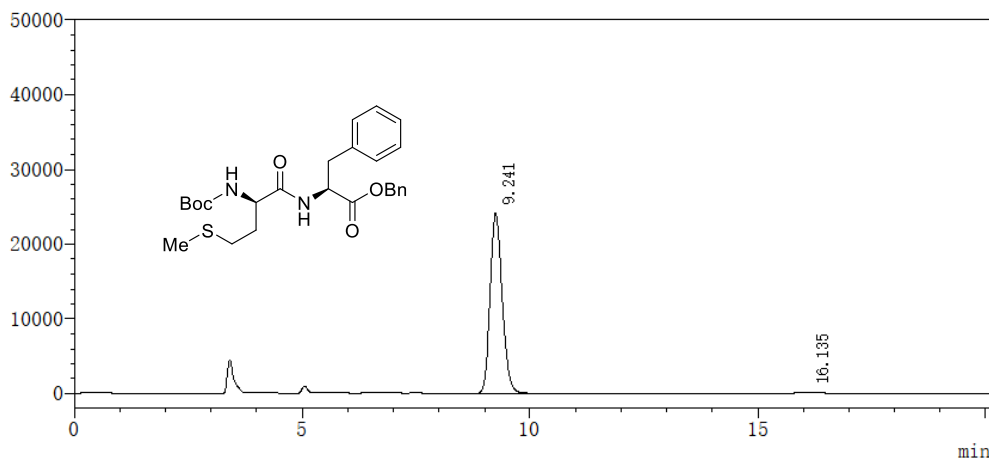

| Peak NO | Area(%) | Area   | RT(min) | Height(mAU) |
|---------|---------|--------|---------|-------------|
| 1       | 99.641  | 453639 | 9.241   | 24136       |
| 2       | 0.359   | 1634   | 16.135  | 83          |

HPLC condition: IC column; hexanes: isopropanal= 85:15; flow rate= 1.0 ml/min; detection wavelength= 254 nm; column temperature: 30°C.

uV

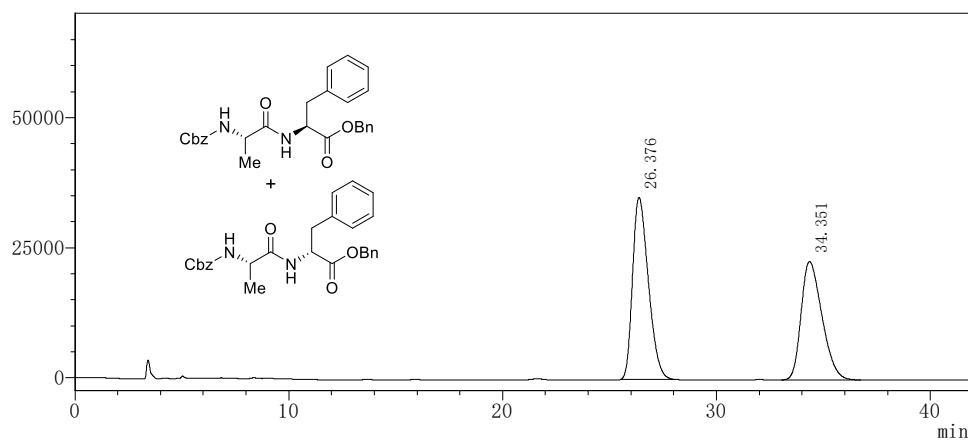

| Peak NO | Area(%) | Area    | RT(min) | Height(mAU) |
|---------|---------|---------|---------|-------------|
| 1       | 53.839  | 1796792 | 26.376  | 34984       |
| 2       | 46.161  | 1540575 | 34.351  | 22751       |

uV

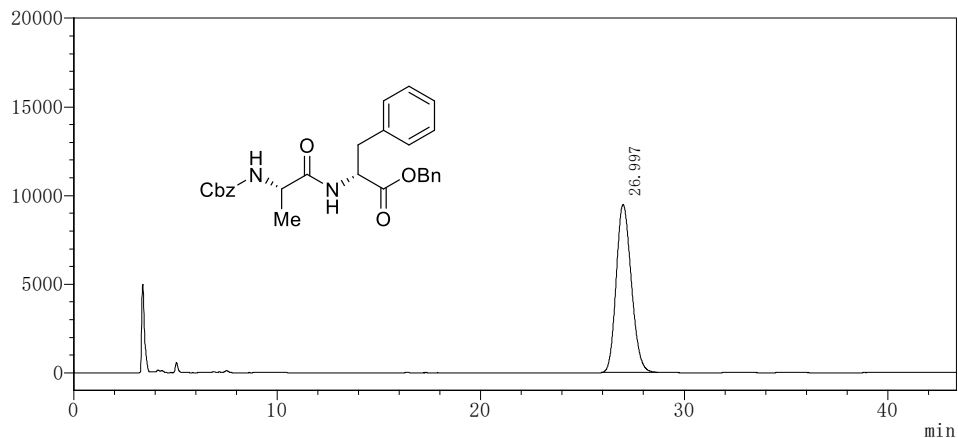

| Peak NO | Area(%) | Area   | RT(min) | Height(mAU) |
|---------|---------|--------|---------|-------------|
| 1       | 100.000 | 488867 | 26.997  | 9479        |
| Total   | 100.000 | 488867 |         | 9479        |

HPLC condition: IC column; hexanes: isopropanal= 85:15; flow rate= 1.0 ml/min; detection wavelength= 254 nm; column temperature: 30°C.

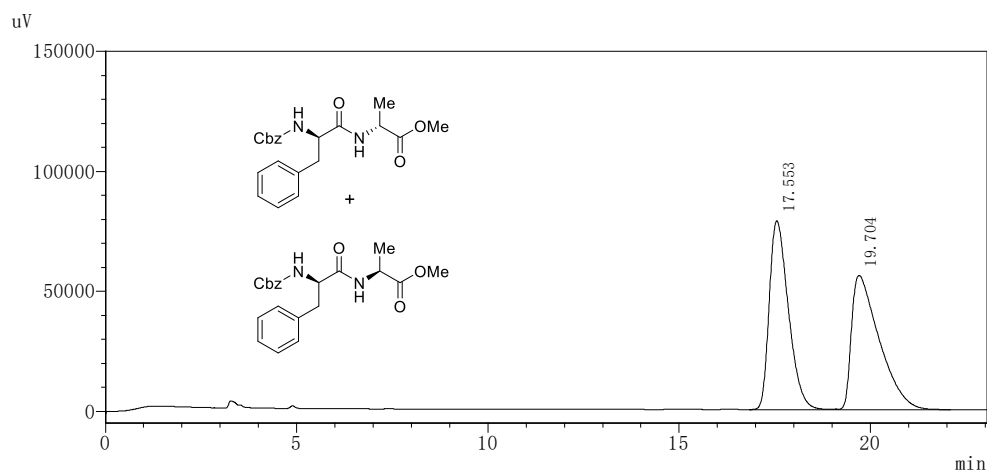

| Peak NO | Area(%) | Area    | RT(min) | Height(mAU) |
|---------|---------|---------|---------|-------------|
| 1       | 49.258  | 2737860 | 17.553  | 78664       |
| 2       | 50.742  | 2820400 | 19.704  | 55900       |

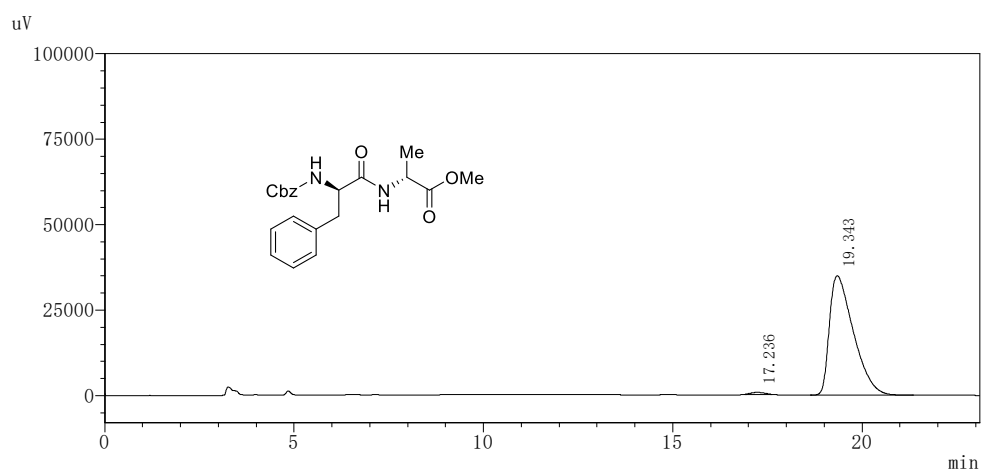

| Peak NO | Area(%) | Area    | RT(min) | Height(mAU) |
|---------|---------|---------|---------|-------------|
| 1       | 1.132   | 17528   | 17.236  | 650         |
| 2       | 98.868  | 1531363 | 19.343  | 34852       |
